# Supplementary material for: Domino Aza-Michael-SNAr-Heteroaromatization Route to C5-Substituted 1-Alkyl-1H-Indole-3-Carboxylic Esters
Source: MDPI journal article supplement (doi:10.3390/molecules27206998), 2022-10-18

# Domino aza-Michael Addition-S<sub>N</sub>Ar-Heteroaromatization Route to C5-Substituted 1-Alkyl-1*H*-indole-3-carboxylic Esters

Ebenezer Ametsetor, Spencer Farthing and Richard A. Bunce\*

Department of Chemistry, Oklahoma State University, Stillwater, OK 74078-3071, USA

\*Correspondence: rab@okstate.edu; Tel: +1-405-744-5952

## Supplementary Information

| Spectral Data                                                                                                                                 | Page |
|-----------------------------------------------------------------------------------------------------------------------------------------------|------|
| <sup>1</sup> H and <sup>13</sup> C NMR for methyl 2-(5-cyano-2-fluorophenyl)acetate ( <b>9</b> ) .....                                        | 3    |
| <sup>1</sup> H and <sup>13</sup> C NMR for methyl 2-(5-nitro-2-fluorophenyl)acrylate ( <b>7</b> ) .....                                       | 4    |
| <sup>1</sup> H and <sup>13</sup> C NMR for methyl 2-(5-cyano-2-fluorophenyl)acrylate ( <b>10</b> ) .....                                      | 5    |
| <sup>1</sup> H and <sup>13</sup> C NMR for methyl 2-(5-carbomethoxy-2-fluorophenyl)acrylate ( <b>13</b> ) .....                               | 6    |
| <sup>1</sup> H and <sup>13</sup> C NMR for methyl 1-hexyl-5-nitro-1 <i>H</i> -indole-3-carboxylate ( <b>17a</b> ) .....                       | 7    |
| <sup>1</sup> H and <sup>13</sup> C NMR for methyl 1-isobutyl-5-nitro-1 <i>H</i> -indole-3-carboxylate ( <b>17b</b> ) .....                    | 8    |
| <sup>1</sup> H and <sup>13</sup> C NMR for methyl 1-allyl-5-nitro-1 <i>H</i> -indole-3-carboxylate ( <b>17c</b> ) .....                       | 9    |
| <sup>1</sup> H and <sup>13</sup> C NMR for methyl 1-cyclopropyl-5-nitro-1 <i>H</i> -indole-3-carboxylate ( <b>17d</b> ) .....                 | 10   |
| <sup>1</sup> H and <sup>13</sup> C NMR for methyl 1-cyclohexyl-5-nitro-1 <i>H</i> -indole-3-carboxylate ( <b>17e</b> ) .....                  | 11   |
| <sup>1</sup> H and <sup>13</sup> C NMR for methyl 1-( <i>tert</i> -butyl)-5-nitro-1 <i>H</i> -indole-3-carboxylate ( <b>17f</b> ) .....       | 12   |
| <sup>1</sup> H and <sup>13</sup> C NMR for methyl 5-nitro-1-phenethyl-1 <i>H</i> -indole-3-carboxylate ( <b>17g</b> ) .....                   | 13   |
| <sup>1</sup> H and <sup>13</sup> C NMR for methyl 1-benzyl-5-nitro-1 <i>H</i> -indole-3-carboxylate ( <b>17h</b> ) .....                      | 14   |
| <sup>1</sup> H and <sup>13</sup> C NMR for methyl 1-(4-methylbenzyl)-5-nitro-1 <i>H</i> -indole-3-carboxylate ( <b>17i</b> ) .....            | 15   |
| <sup>1</sup> H and <sup>13</sup> C NMR for methyl 1-(3-methoxybenzyl)-5-nitro-1 <i>H</i> -indole-3-carboxylate ( <b>17j</b> ) .....           | 16   |
| <sup>1</sup> H and <sup>13</sup> C NMR for methyl 1-(4-methoxybenzyl)-5-nitro-1 <i>H</i> -indole-3-carboxylate ( <b>17k</b> ) .....           | 17   |
| <sup>1</sup> H and <sup>13</sup> C NMR for methyl 1-(4-chlorobenzyl)-5-nitro-1 <i>H</i> -indole-3-carboxylate ( <b>17l</b> ) .....            | 18   |
| <sup>1</sup> H and <sup>13</sup> C NMR for methyl 5-nitro-1-((4-trifluoromethyl)benzyl)-1 <i>H</i> -indole-3-carboxylate ( <b>17m</b> ) ..... | 19   |
| <sup>1</sup> H and <sup>13</sup> C NMR for methyl 5-nitro-1-(3-nitrobenzyl)-1 <i>H</i> -indole-3-carboxylate ( <b>17n</b> ) .....             | 20   |
| <sup>1</sup> H and <sup>13</sup> C NMR for methyl 1-amino-5-nitro-1 <i>H</i> -indole-3-carboxylate ( <b>17o</b> ) .....                       | 21   |
| <br>                                                                                                                                          |      |
| <sup>1</sup> H and <sup>13</sup> C NMR for methyl 5-cyano-1-hexyl-1 <i>H</i> -indole-3-carboxylate ( <b>18a</b> ) .....                       | 22   |
| <sup>1</sup> H and <sup>13</sup> C NMR for methyl 5-cyano-1-isobutyl-1 <i>H</i> -indole-3-carboxylate ( <b>18b</b> ) .....                    | 23   |
| <sup>1</sup> H and <sup>13</sup> C NMR for methyl 5-cyano-1-cyclopropyl-1 <i>H</i> -indole-3-carboxylate ( <b>18d</b> ) .....                 | 24   |
| <sup>1</sup> H and <sup>13</sup> C NMR for methyl 5-cyano-1-cyclohexyl-1 <i>H</i> -indole-3-carboxylate ( <b>18e</b> ) .....                  | 25   |
| <sup>1</sup> H and <sup>13</sup> C NMR for methyl 5-cyano-1-phenethyl-1 <i>H</i> -indole-3-carboxylate ( <b>18g</b> ) .....                   | 26   |
| <sup>1</sup> H and <sup>13</sup> C NMR for methyl 5-cyano-1-benzyl-1 <i>H</i> -indole-3-carboxylate ( <b>18h</b> ) .....                      | 27   |
| <sup>1</sup> H and <sup>13</sup> C NMR for methyl 5-cyano-1-(4-methylbenzyl)-1 <i>H</i> -indole-3-carboxylate ( <b>18i</b> ) .....            | 28   |
| <sup>1</sup> H and <sup>13</sup> C NMR for methyl 5-cyano-1-(3-methoxybenzyl)-1 <i>H</i> -indole-3-carboxylate ( <b>18j</b> ) .....           | 29   |
| <sup>1</sup> H and <sup>13</sup> C NMR for methyl 5-cyano-1-(4-methoxybenzyl)-1 <i>H</i> -indole-3-carboxylate ( <b>18k</b> ) .....           | 30   |
| <sup>1</sup> H and <sup>13</sup> C NMR for methyl 5-cyano-1-(4-chlorobenzyl)-1 <i>H</i> -indole-3-carboxylate ( <b>18l</b> ) .....            | 31   |
| <sup>1</sup> H and <sup>13</sup> C NMR for methyl 5-cyano-1-(3-nitrobenzyl)-1 <i>H</i> -indole-3-carboxylate ( <b>18n</b> ) .....             | 32   |

|                                                                                                                                   |    |
|-----------------------------------------------------------------------------------------------------------------------------------|----|
| <sup>1</sup> H and <sup>13</sup> C NMR for dimethyl 1-hexyl-1 <i>H</i> -indole-3,5-dicarboxylate ( <b>19a</b> ) .....             | 33 |
| <sup>1</sup> H and <sup>13</sup> C NMR for dimethyl 1-isobutyl-1 <i>H</i> -indole-3,5-dicarboxylate ( <b>19b</b> ) .....          | 34 |
| <sup>1</sup> H and <sup>13</sup> C NMR for dimethyl 1-allyl-1 <i>H</i> -indole-3,5-dicarboxylate ( <b>19c</b> ) .....             | 35 |
| <sup>1</sup> H and <sup>13</sup> C NMR for dimethyl 1-cyclopropyl-1 <i>H</i> -indole-3,5-dicarboxylate ( <b>19d</b> ) .....       | 36 |
| <sup>1</sup> H and <sup>13</sup> C NMR for dimethyl 1-cyclohexyl-1 <i>H</i> -indole-3,5-dicarboxylate ( <b>19e</b> ) .....        | 37 |
| <sup>1</sup> H and <sup>13</sup> C NMR for dimethyl 1-phenethyl-1 <i>H</i> -indole-3,5-dicarboxylate ( <b>19g</b> ) .....         | 38 |
| <sup>1</sup> H and <sup>13</sup> C NMR for dimethyl 1-benzyl-1 <i>H</i> -indole-3,5-dicarboxylate ( <b>19h</b> ) .....            | 39 |
| <sup>1</sup> H and <sup>13</sup> C NMR for dimethyl 1-(4-methylbenzyl)-1 <i>H</i> -indole-3,5-dicarboxylate ( <b>19i</b> ) .....  | 40 |
| <sup>1</sup> H and <sup>13</sup> C NMR for dimethyl 1-(3-methoxybenzyl)-1 <i>H</i> -indole-3,5-dicarboxylate ( <b>19j</b> ) ..... | 41 |
| <sup>1</sup> H and <sup>13</sup> C NMR for dimethyl 1-(4-methoxybenzyl)-1 <i>H</i> -indole-3,5-dicarboxylate ( <b>19k</b> ) ..... | 42 |
| <sup>1</sup> H and <sup>13</sup> C NMR for dimethyl 1-(4-chlorobenzyl)-1 <i>H</i> -indole-3,5-dicarboxylate ( <b>19l</b> ) .....  | 43 |
| <sup>1</sup> H and <sup>13</sup> C NMR for dimethyl 1-(3-nitrobenzyl)-1 <i>H</i> -indole-3,5-dicarboxylate ( <b>19n</b> ) .....   | 44 |

<sup>1</sup>H for methyl 2-(5-cyano-2-fluorophenyl)acetate (9)

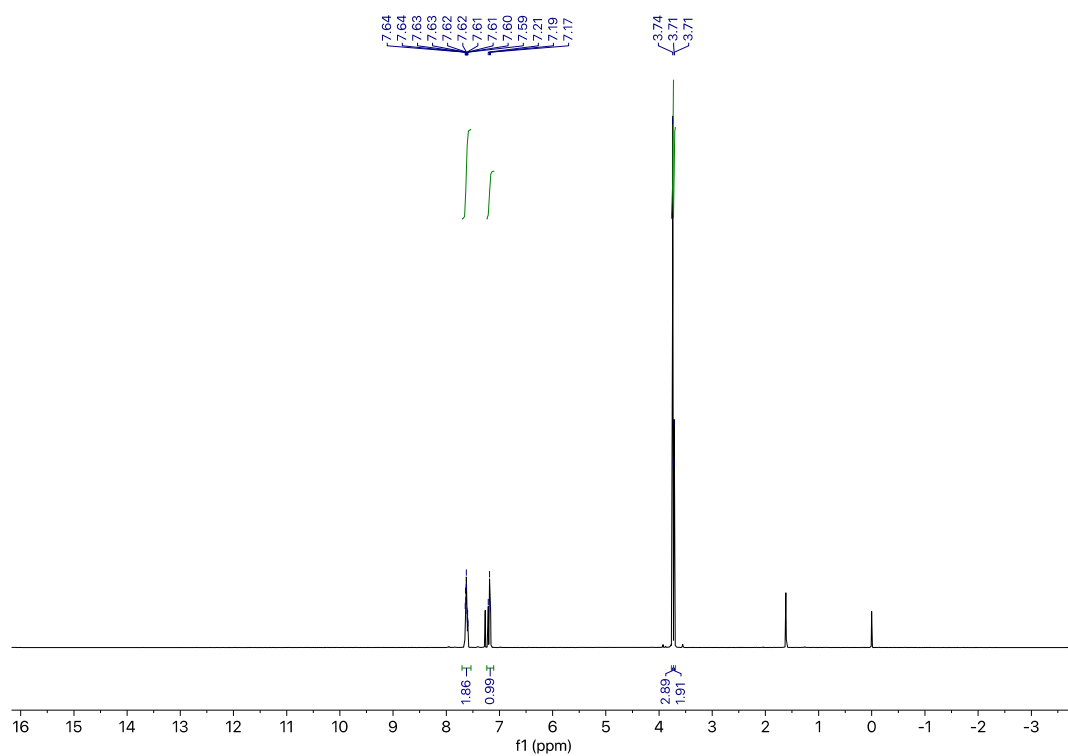

<sup>13</sup>C for methyl 2-(5-cyano-2-fluorophenyl)acetate (9)

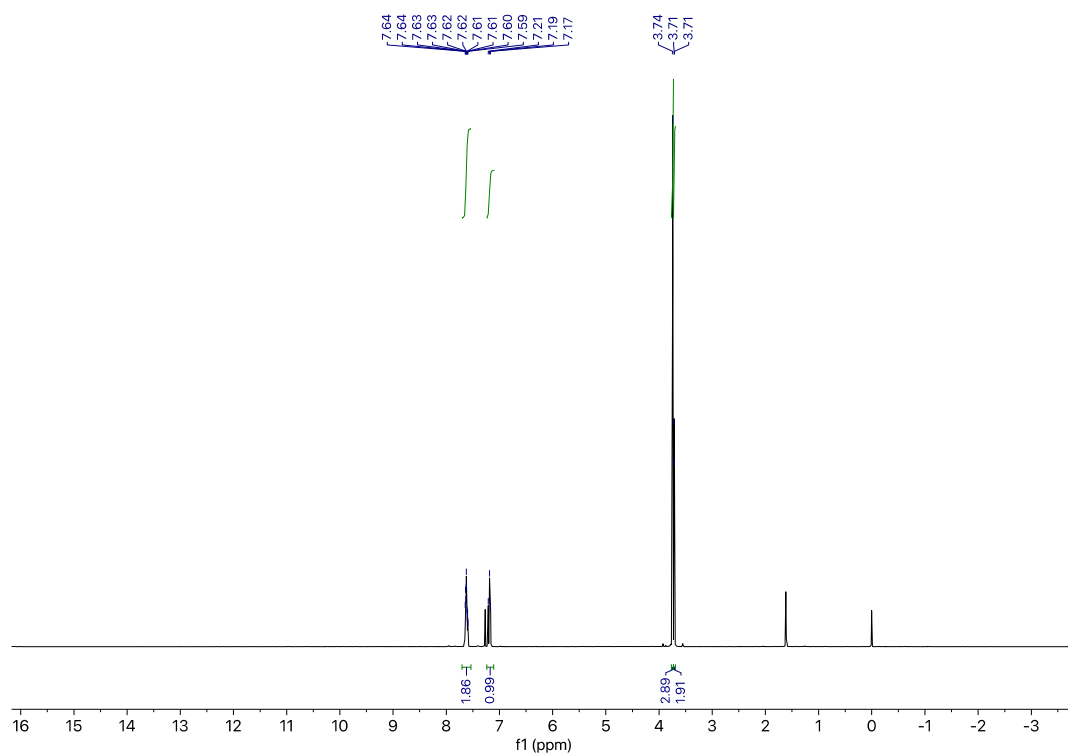

<sup>1</sup>H NMR for methyl 2-(5-nitro-2-fluorophenyl)acrylate (7)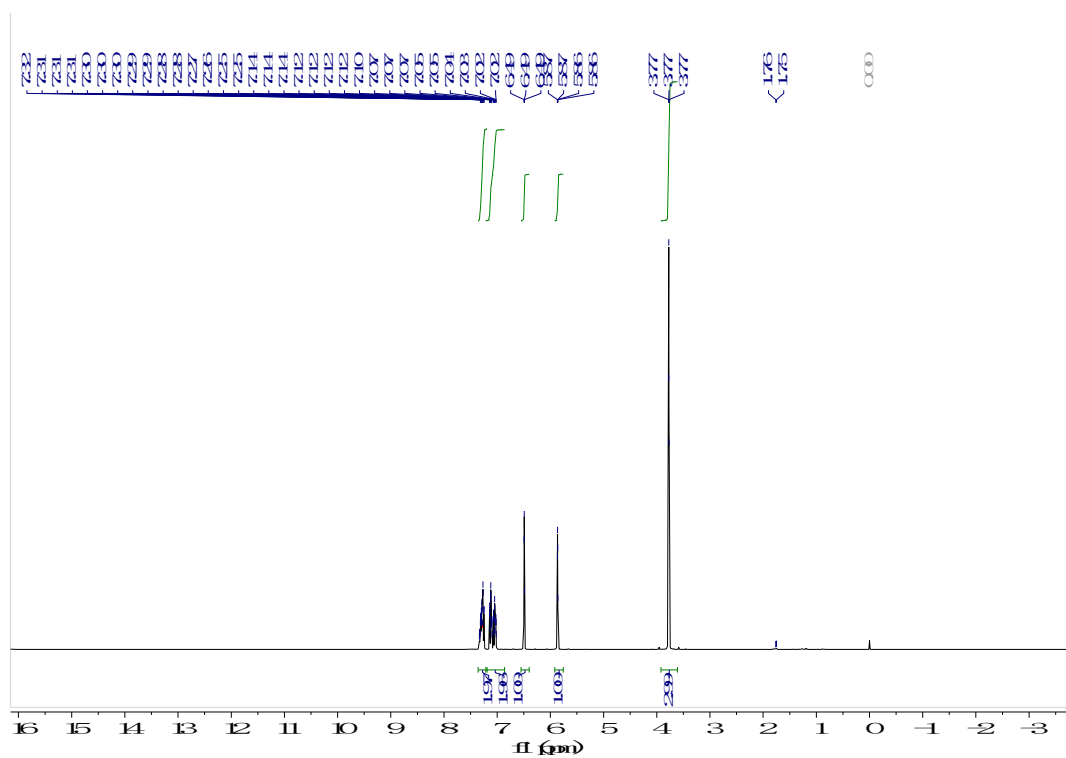

<sup>13</sup>C NMR for methyl 2-(5-nitro-2-fluorophenyl)acrylate (7)

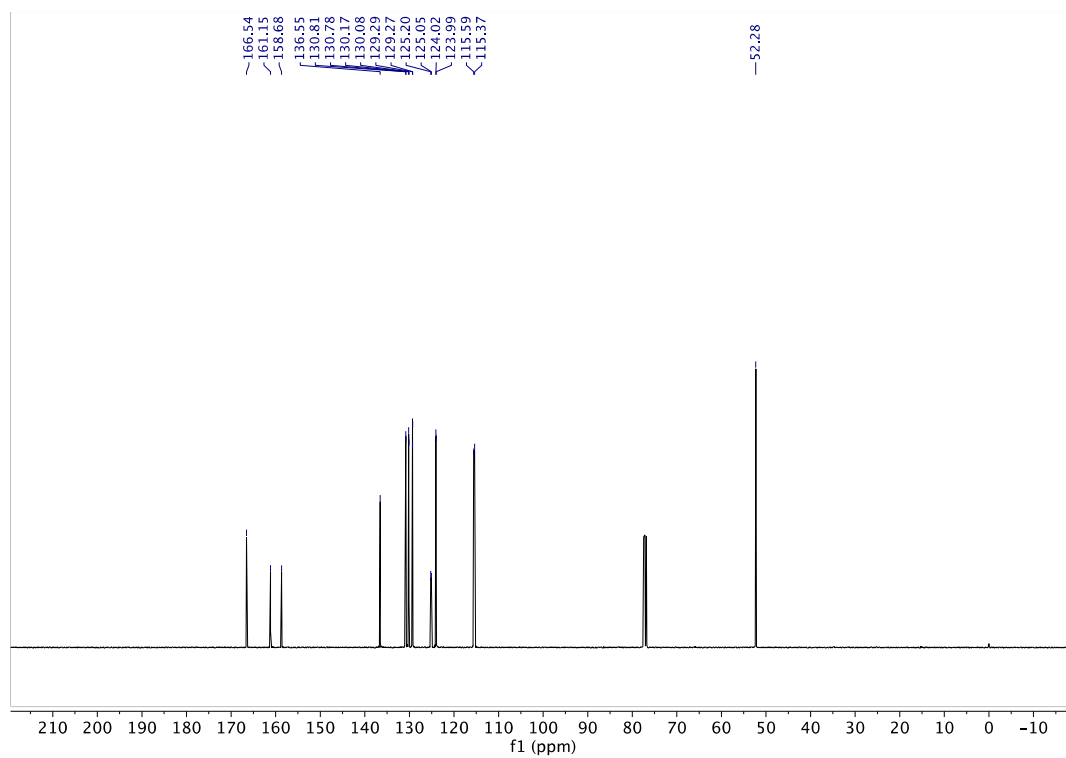

$^1\text{H}$  NMR for methyl 2-(5-cyano-2-fluorophenyl)acrylate (**10**)

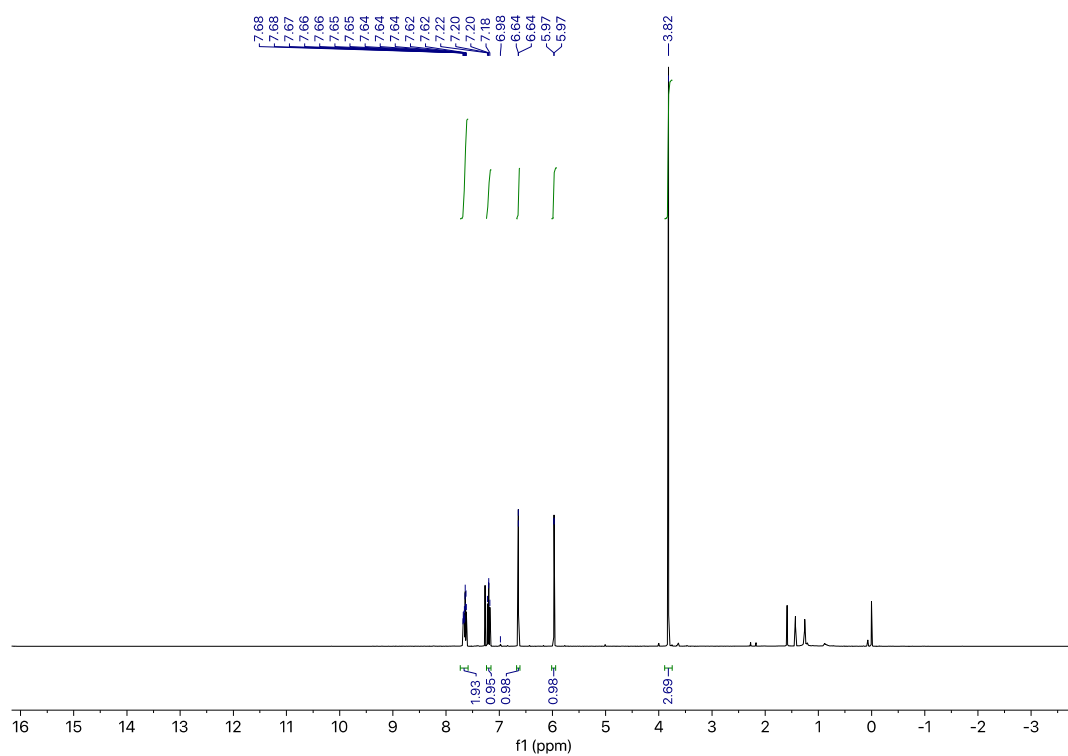

$^{13}\text{C}$  for methyl 2-(5-cyano-2-fluorophenyl)acrylate (**10**)

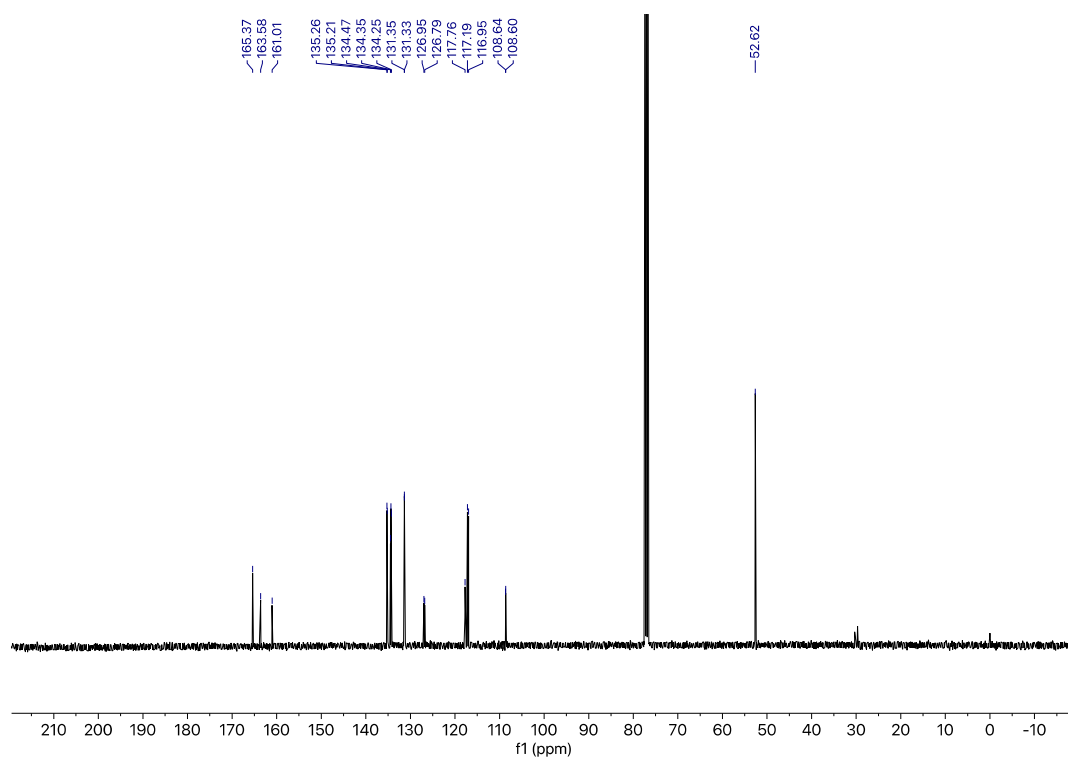

$^1\text{H}$  NMR for methyl 2-(5-carbomethoxy-2-fluorophenyl)acrylate (**13**)

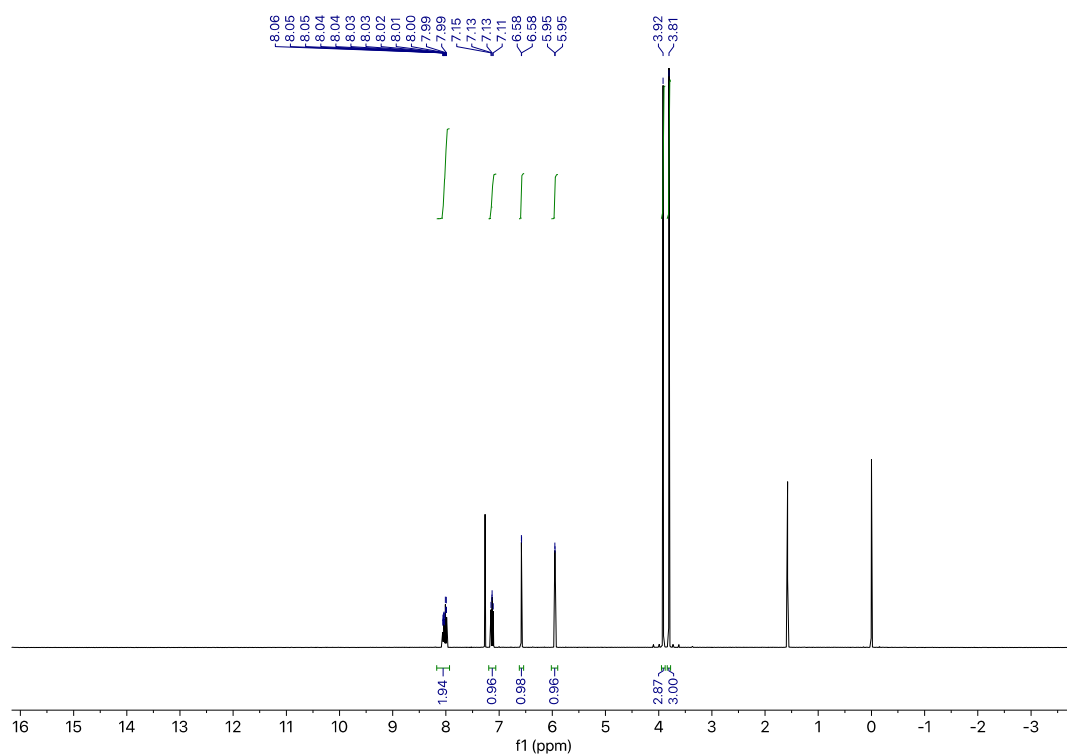

$^{13}\text{C}$  NMR for methyl 2-(5-carbomethoxy-2-fluorophenyl)acrylate (**13**)

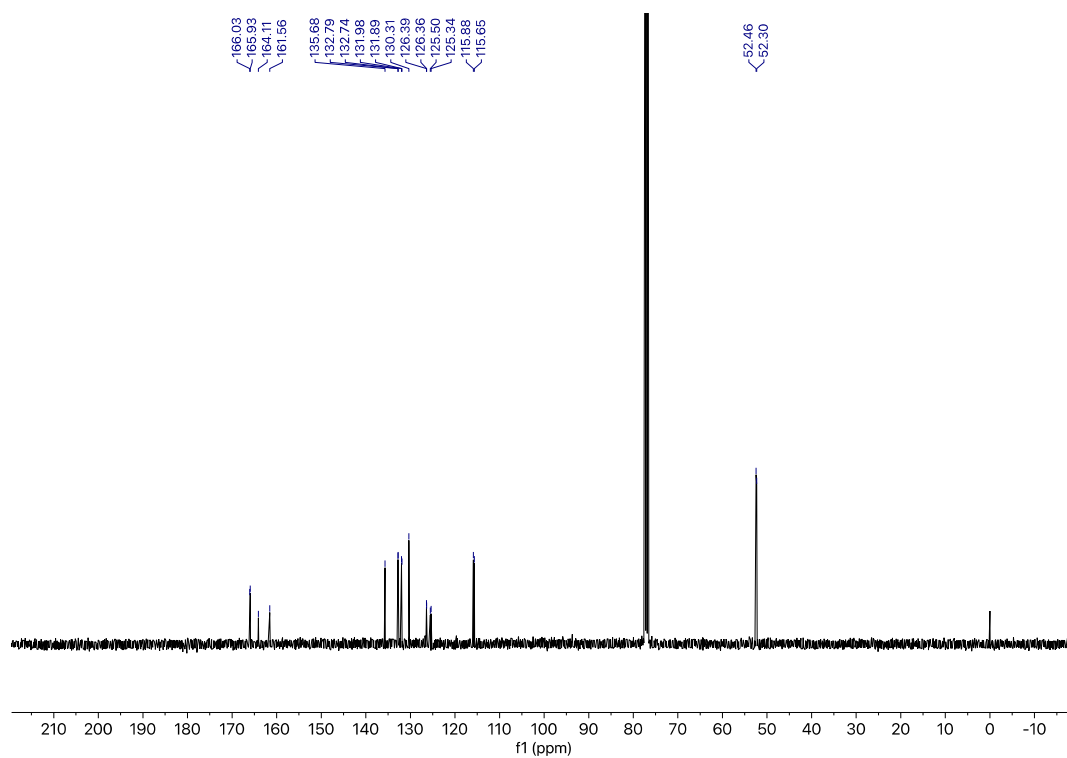

<sup>1</sup>H NMR for methyl 1-hexyl-5-nitro-1*H*-indole-3-carboxylate (**17a**)

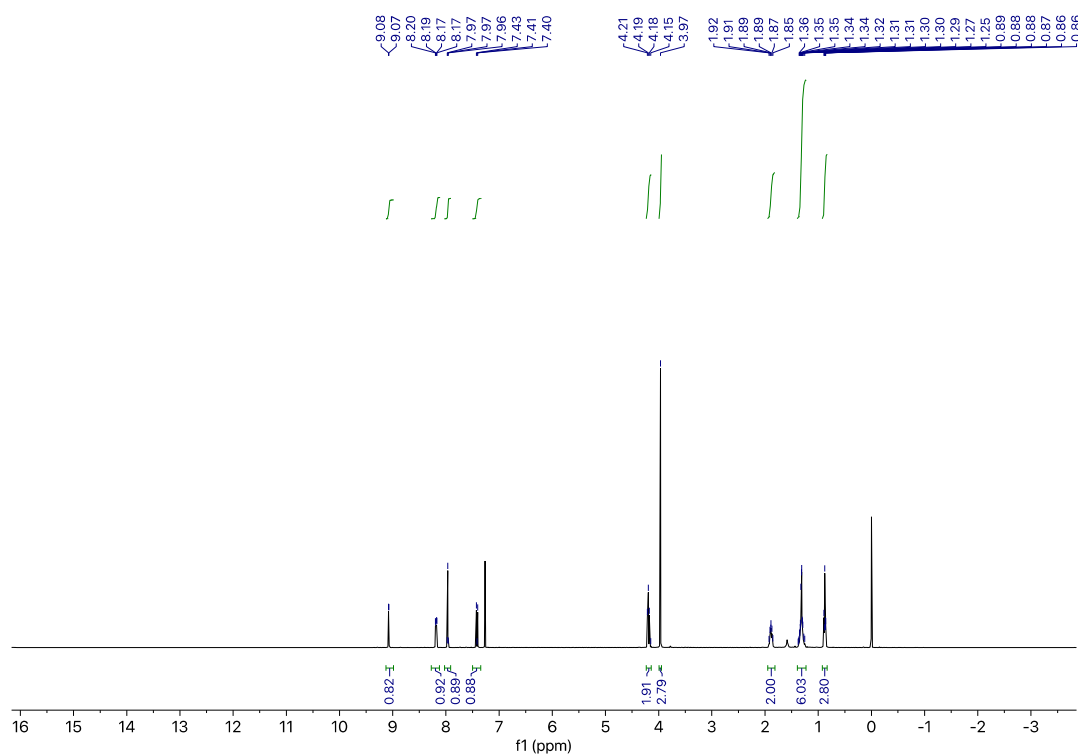

<sup>13</sup>C NMR for methyl 1-hexyl-5-nitro-1*H*-indole-3-carboxylate (**17a**)

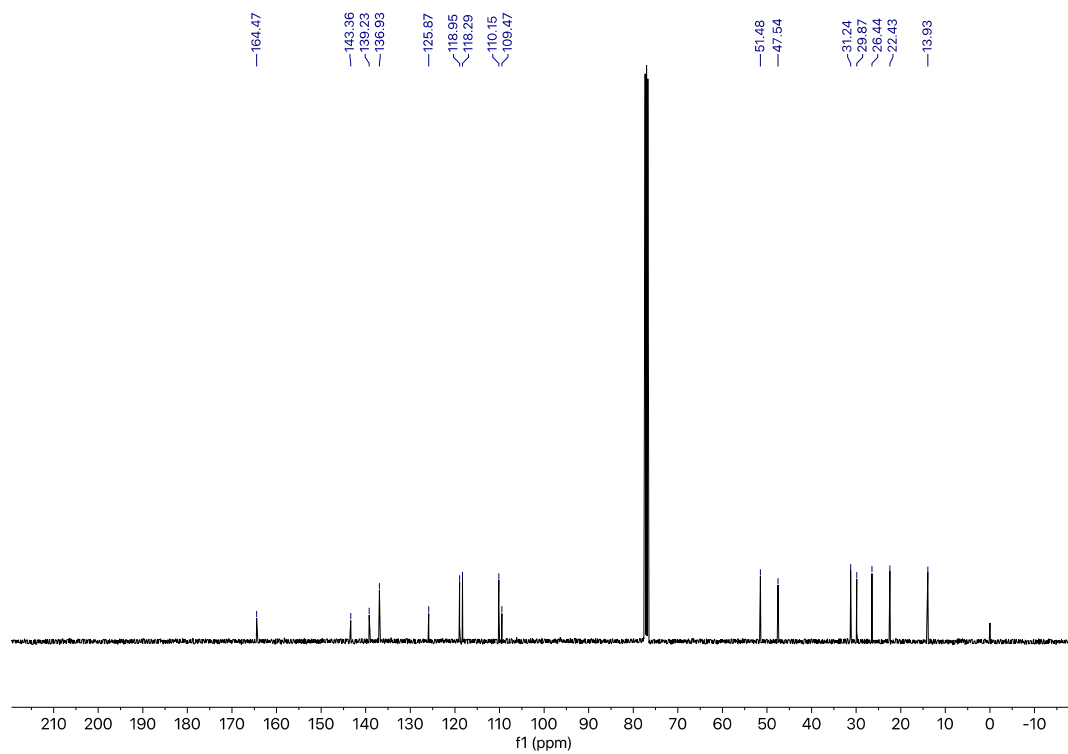

$^1\text{H}$  NMR for methyl 1-isobutyl-5-nitro-1*H*-indole-3-carboxylate (**17b**)

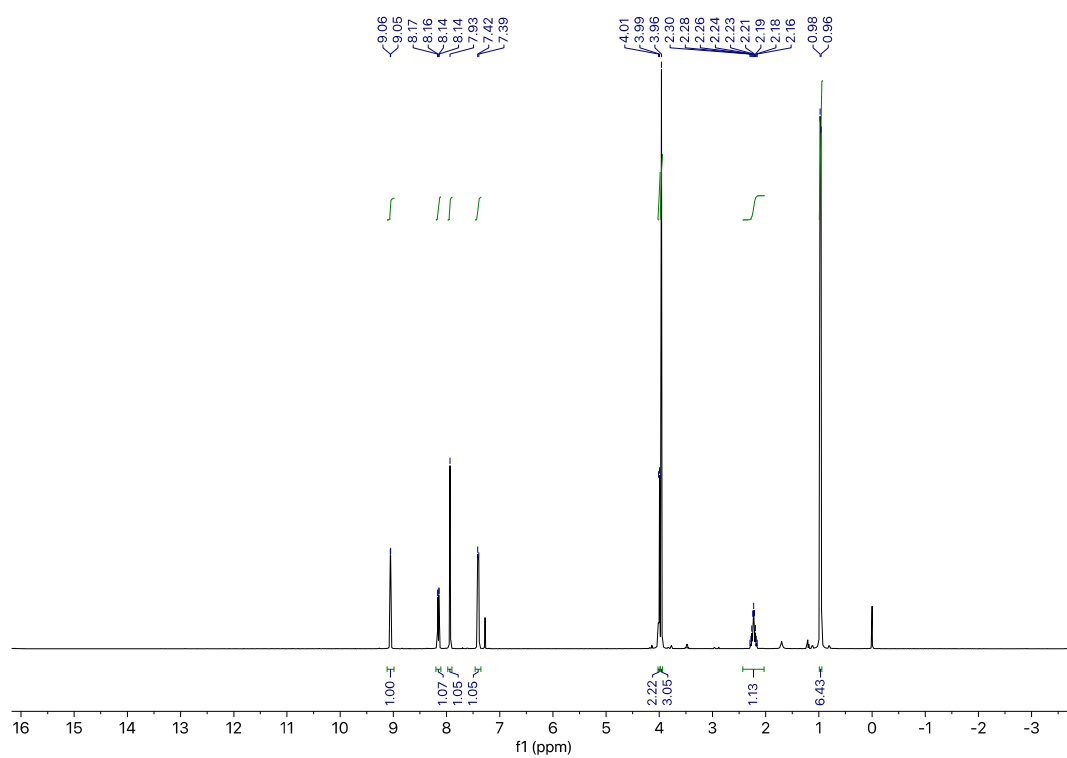

$^{13}\text{C}$  NMR for methyl 1-isobutyl-5-nitro-1*H*-indole-3-carboxylate (**17b**)

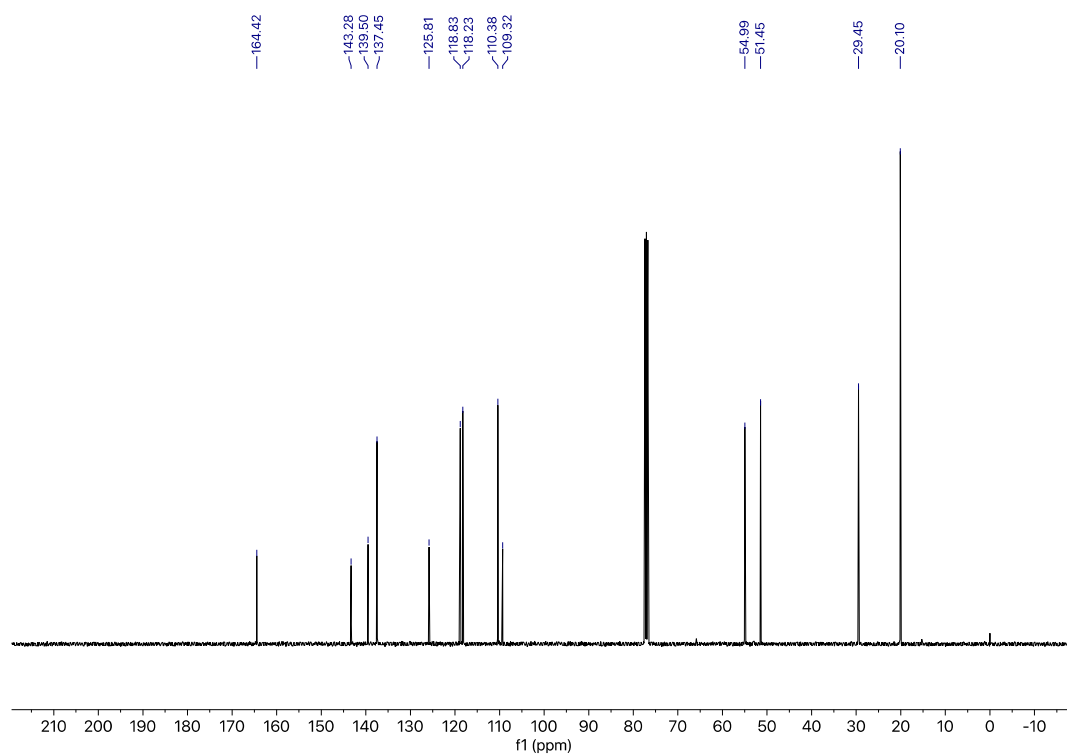



<sup>1</sup>H NMR for methyl 1-allyl-5-nitro-1*H*-indole-3-carboxylate (**17c**)

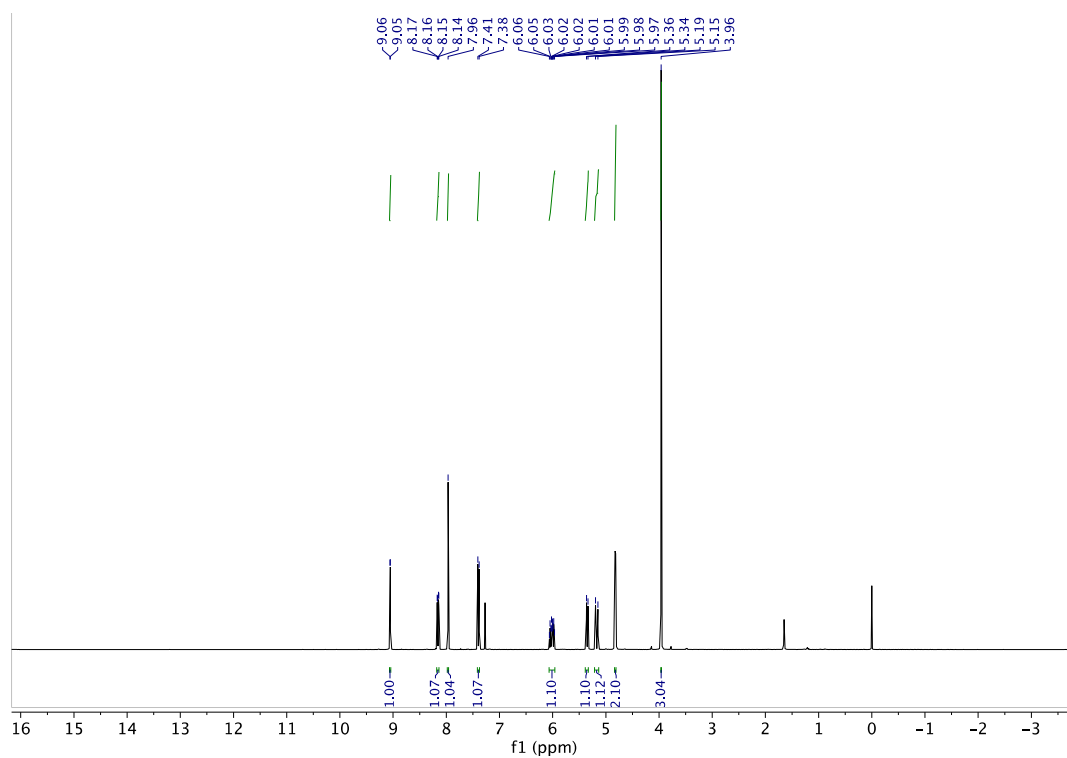

<sup>13</sup>C NMR for methyl 1-allyl-5-nitro-1*H*-indole-3-carboxylate (**17c**)

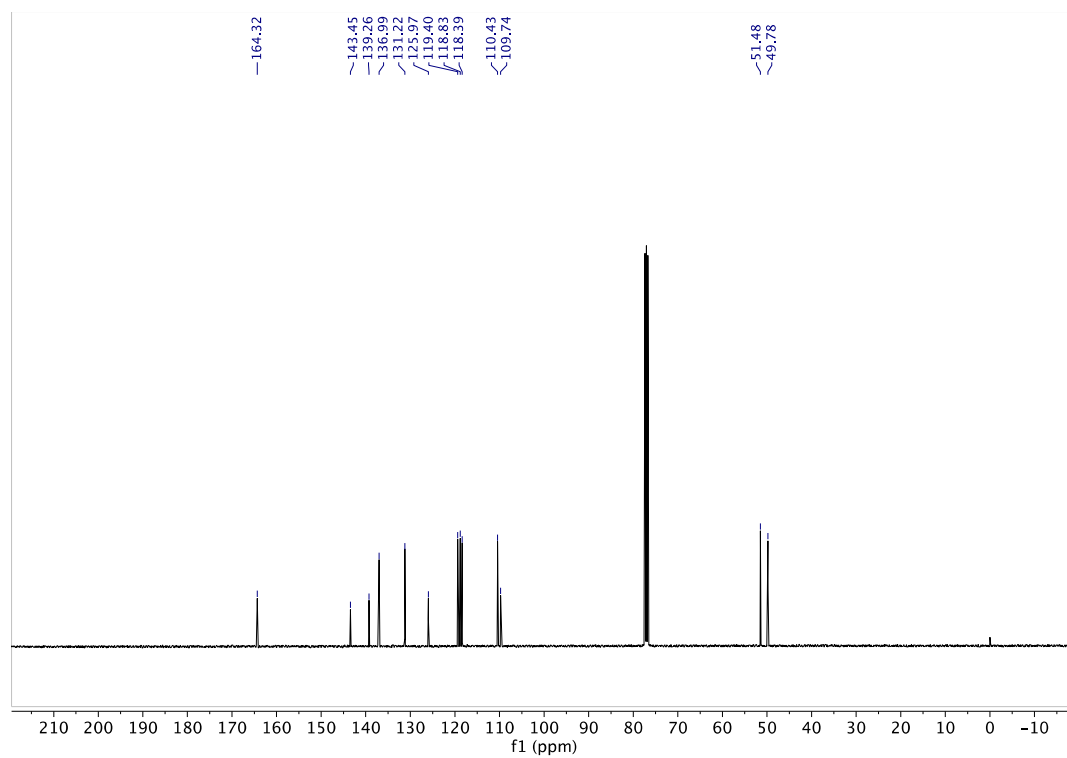

$^1\text{H}$  NMR for methyl 1-cyclopropyl-5-nitro-1*H*-indole-3-carboxylate (**17d**)

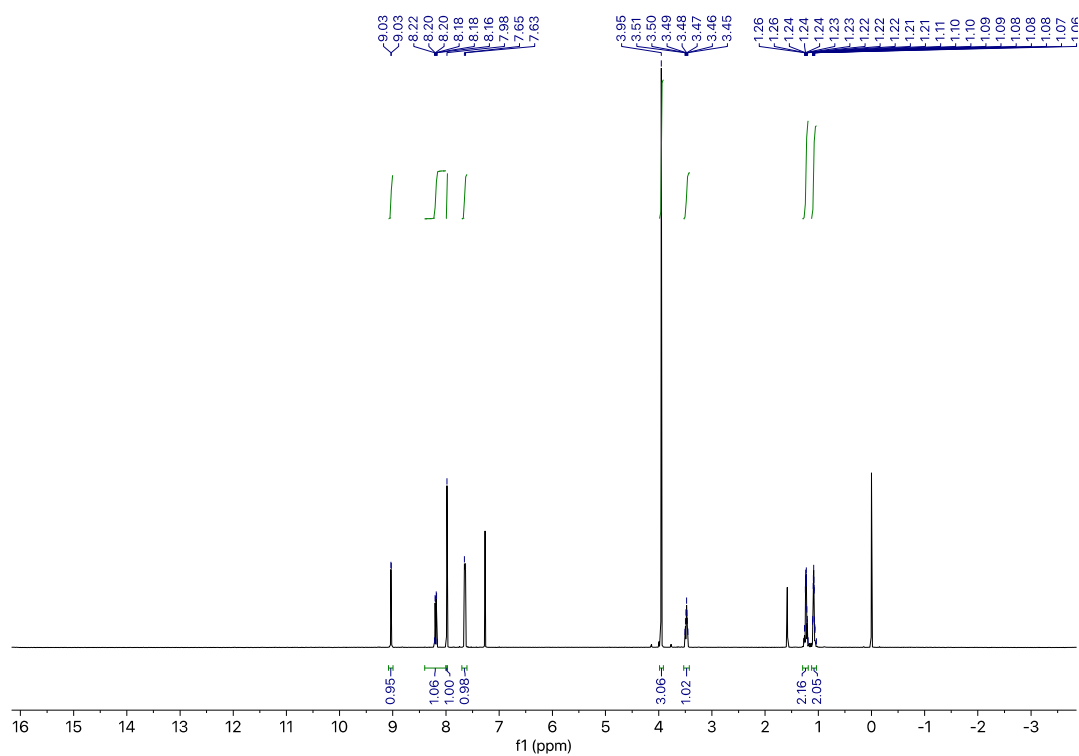

$^{13}\text{C}$  NMR for methyl 1-cyclopropyl-5-nitro-1*H*-indole-3-carboxylate (**17d**)

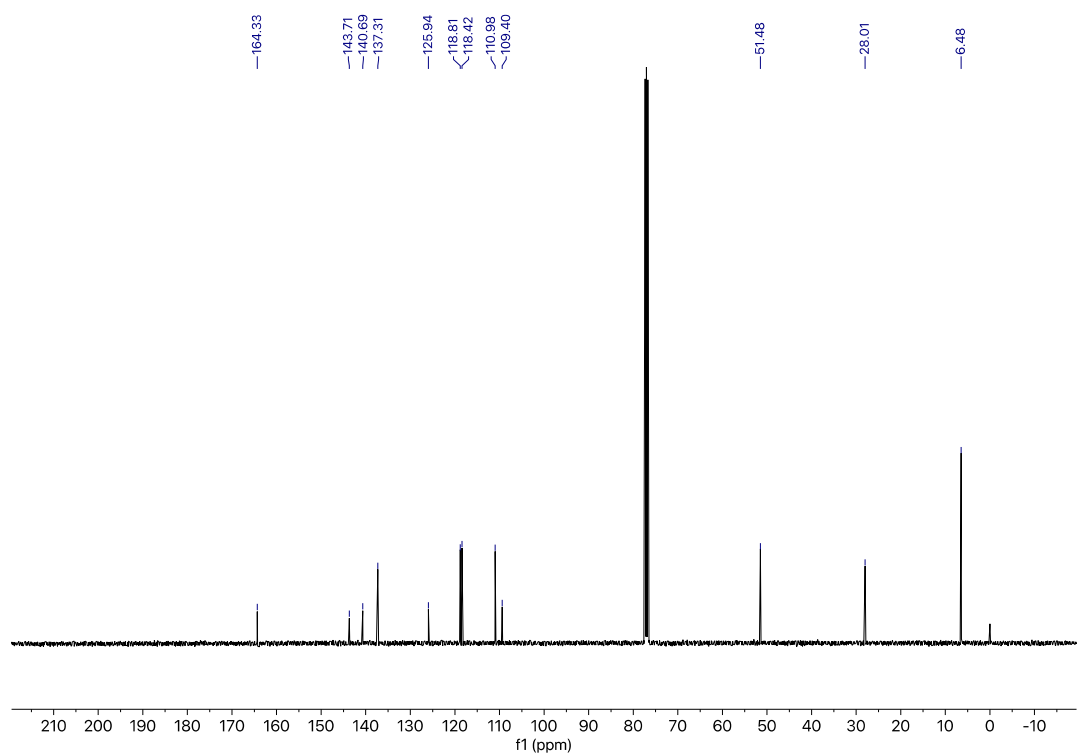

<sup>1</sup>H NMR for methyl 1-cyclohexyl-5-nitro-1*H*-indole-3-carboxylate (**17e**)

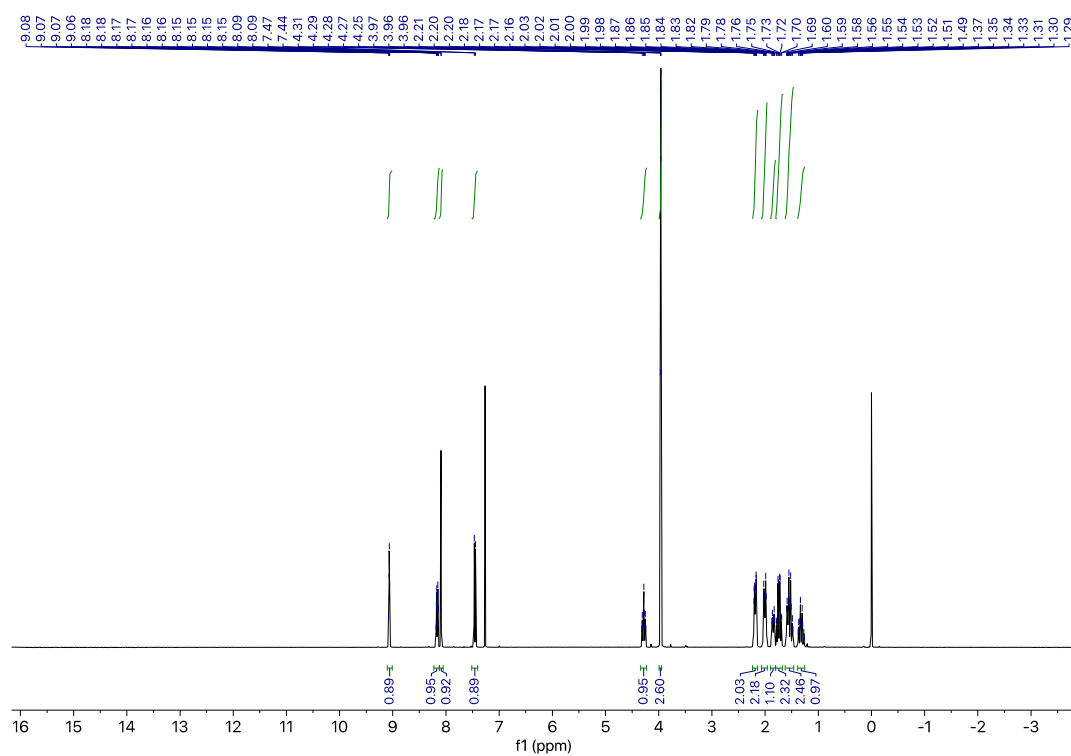

<sup>13</sup>C NMR for methyl 1-cyclohexyl-5-nitro-1*H*-indole-3-carboxylate (**17e**)

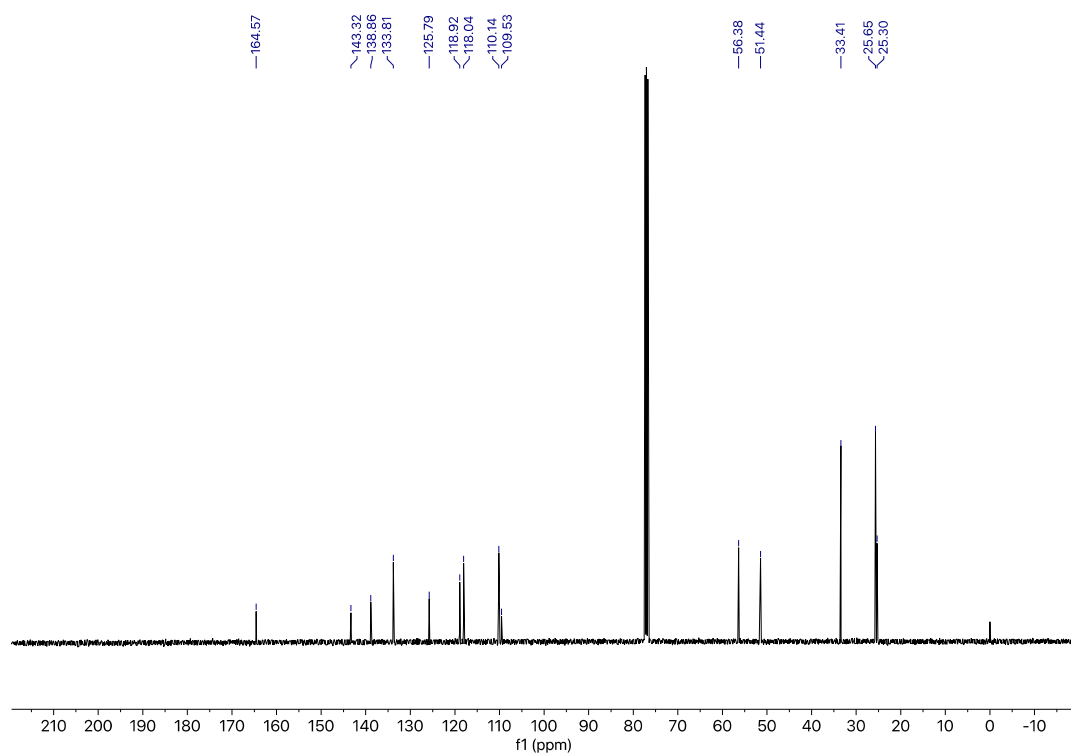

$^1\text{H}$  NMR for methyl 1-(*tert*-butyl)-5-nitro-1*H*-indole-3-carboxylate (**17f**)

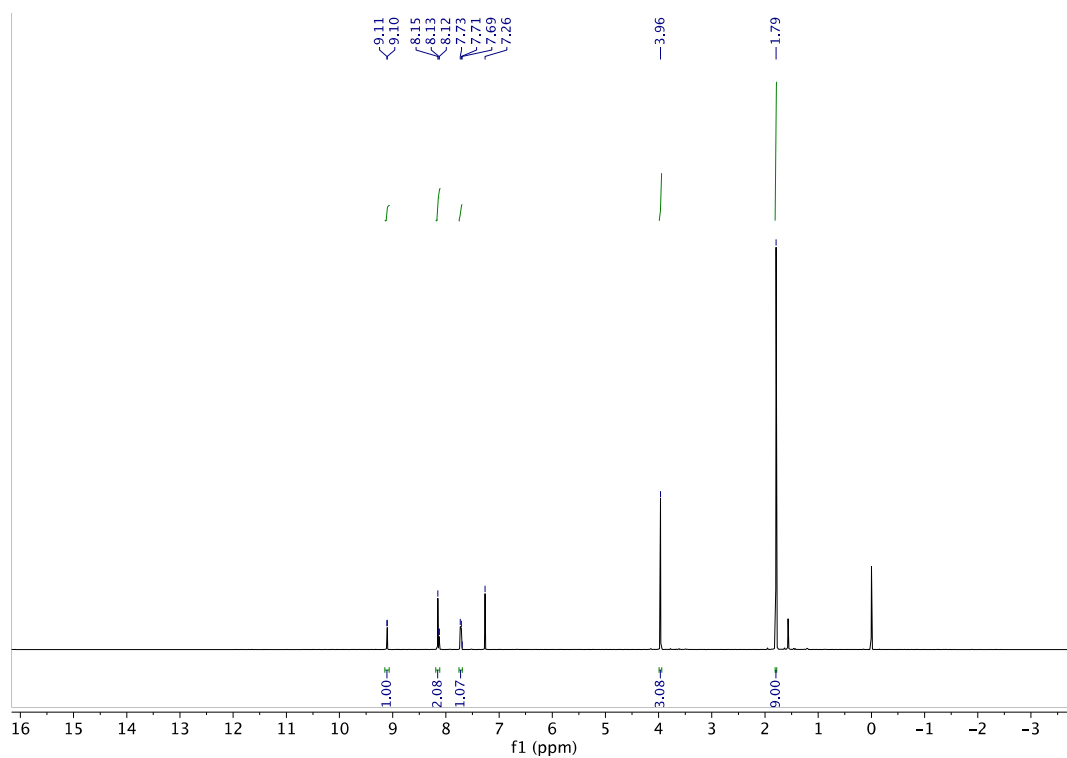

$^{13}\text{C}$  NMR for methyl 1-(*tert*-butyl)-5-nitro-1*H*-indole-3-carboxylate (**17f**)

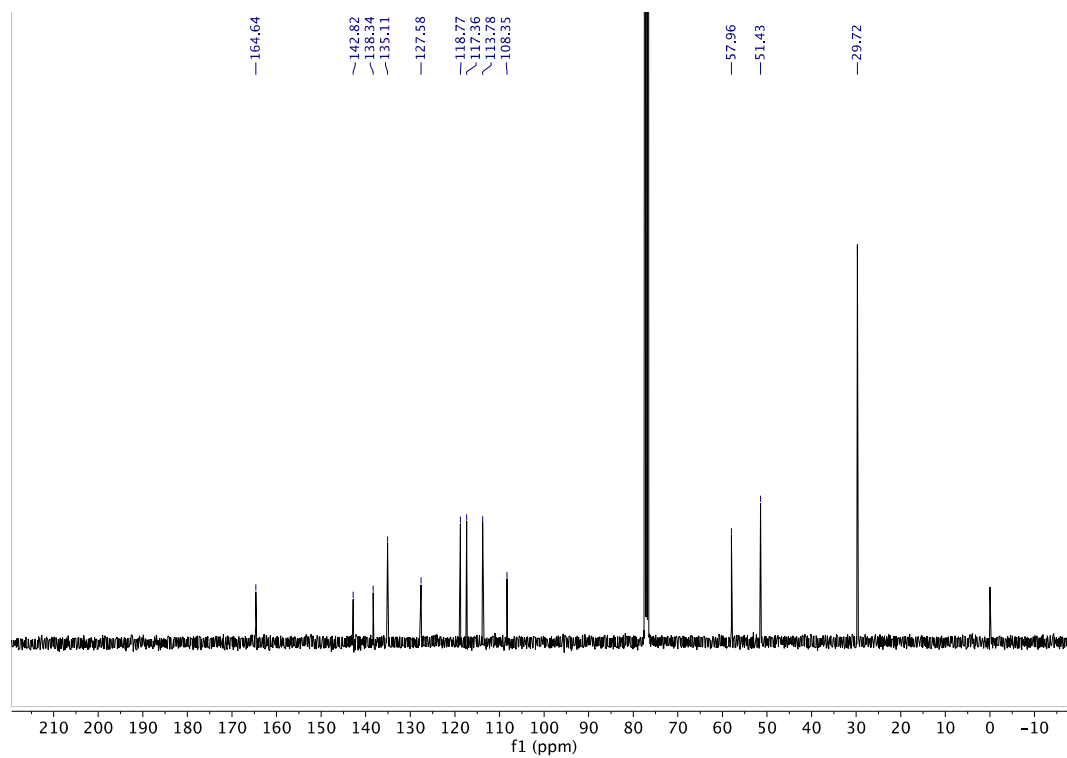

<sup>1</sup>H NMR for methyl 5-nitro-1-phenethyl-1*H*-indole-3-carboxylate (**17g**)

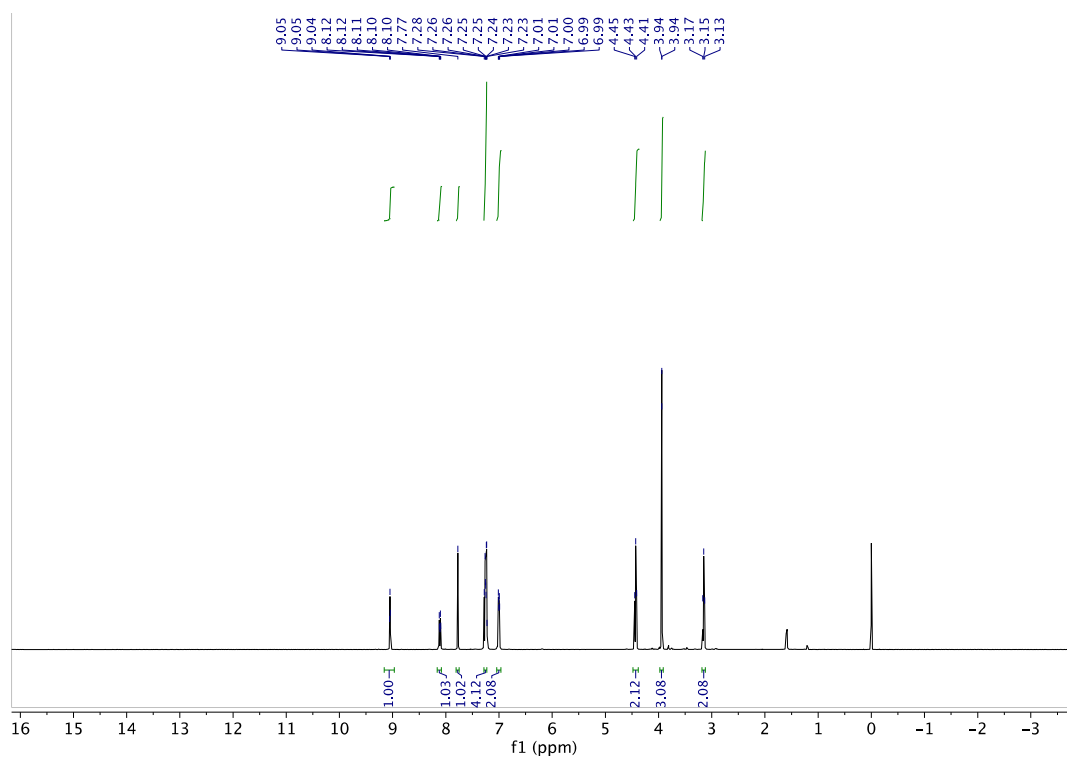

<sup>13</sup>C NMR for methyl 5-nitro-1-phenethyl-1*H*-indole-3-carboxylate (**17g**)

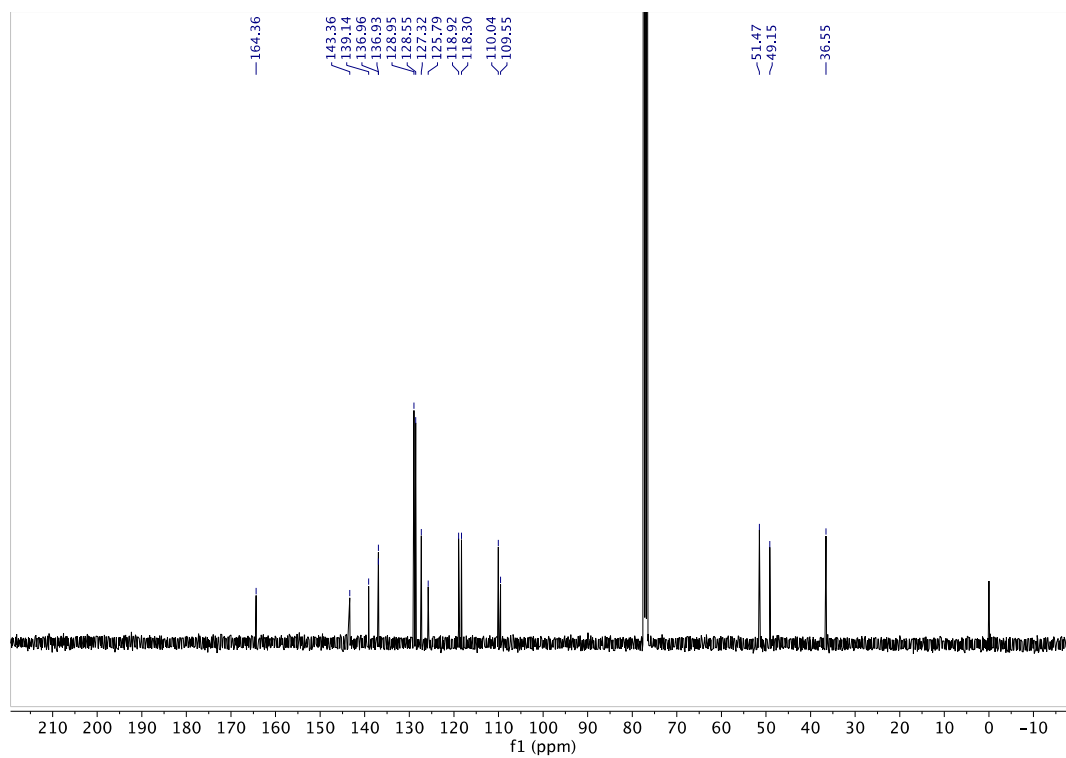

$^1\text{H}$  NMR for methyl 1-benzyl-5-nitro-1*H*-indole-3-carboxylate (**17h**)

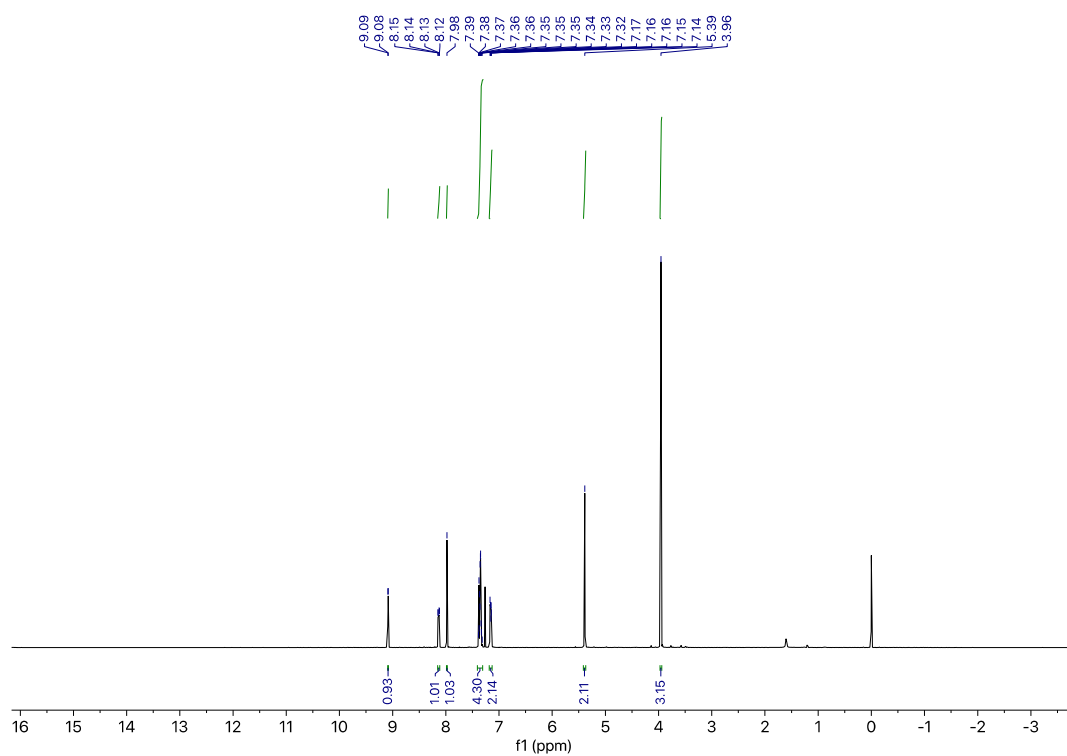

$^1\text{H}$  NMR for methyl 1-(4-methylbenzyl)-5-nitro-1*H*-indole-3-carboxylate (**17i**)

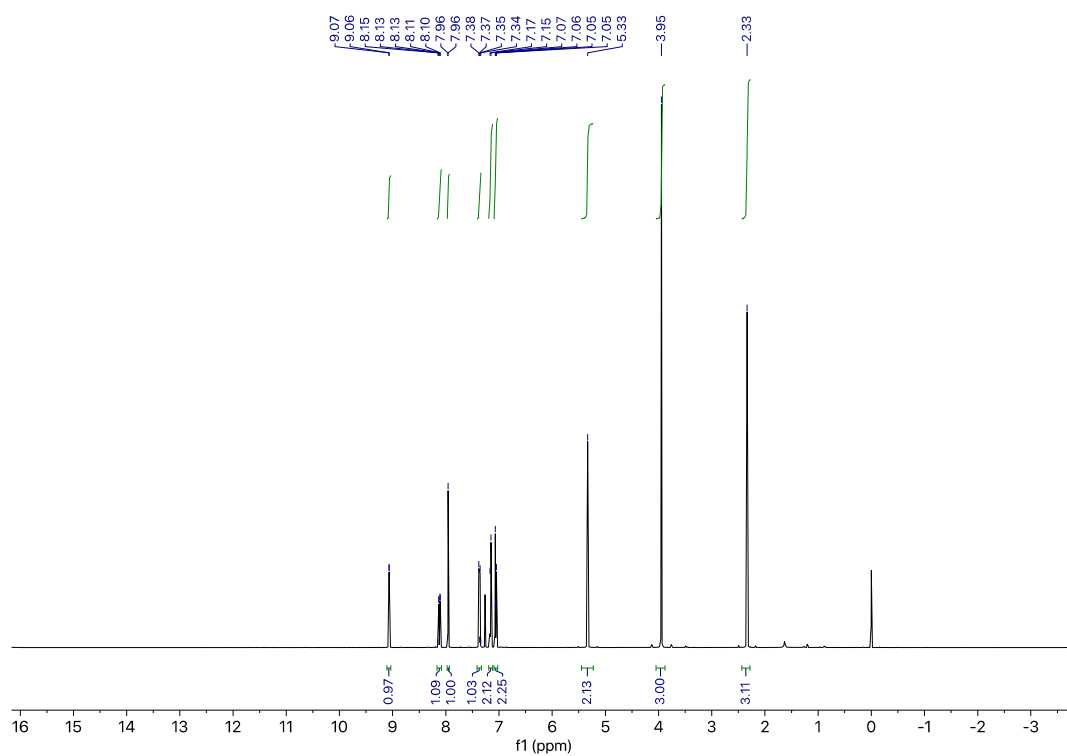

$^{13}\text{C}$  NMR for methyl 1-(4-methylbenzyl)-5-nitro-1*H*-indole-3-carboxylate (**17i**)

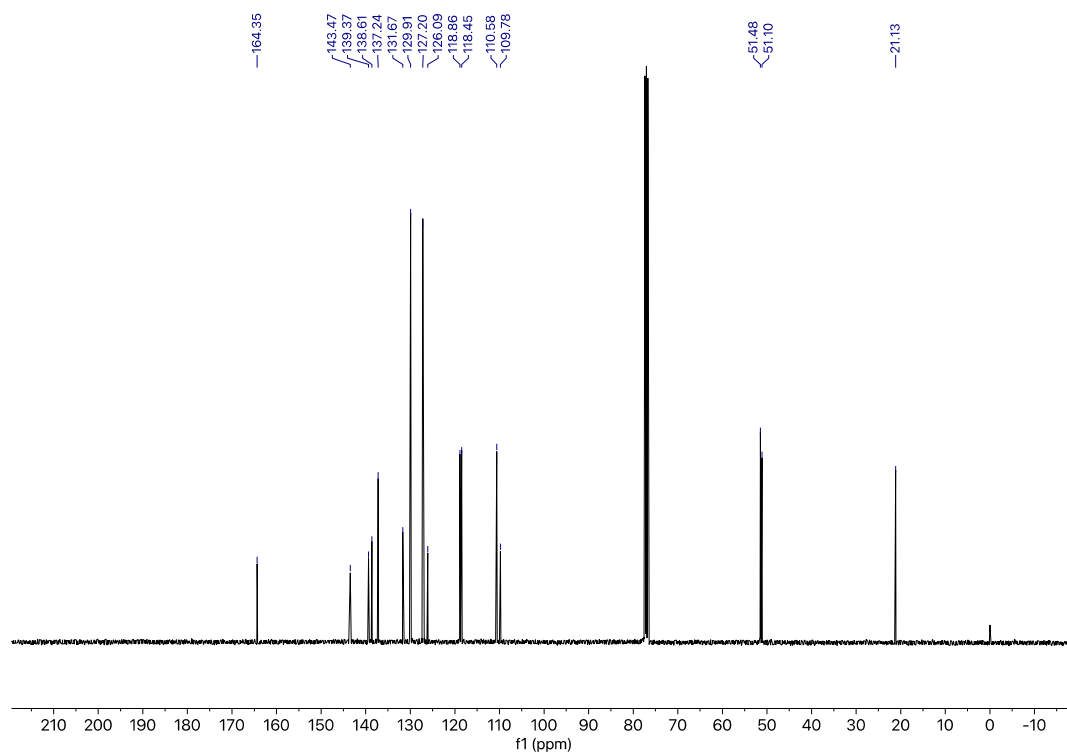

$^1\text{H}$  NMR for methyl 1-(3-methoxybenzyl)-5-nitro-1*H*-indole-3-carboxylate (**17j**)

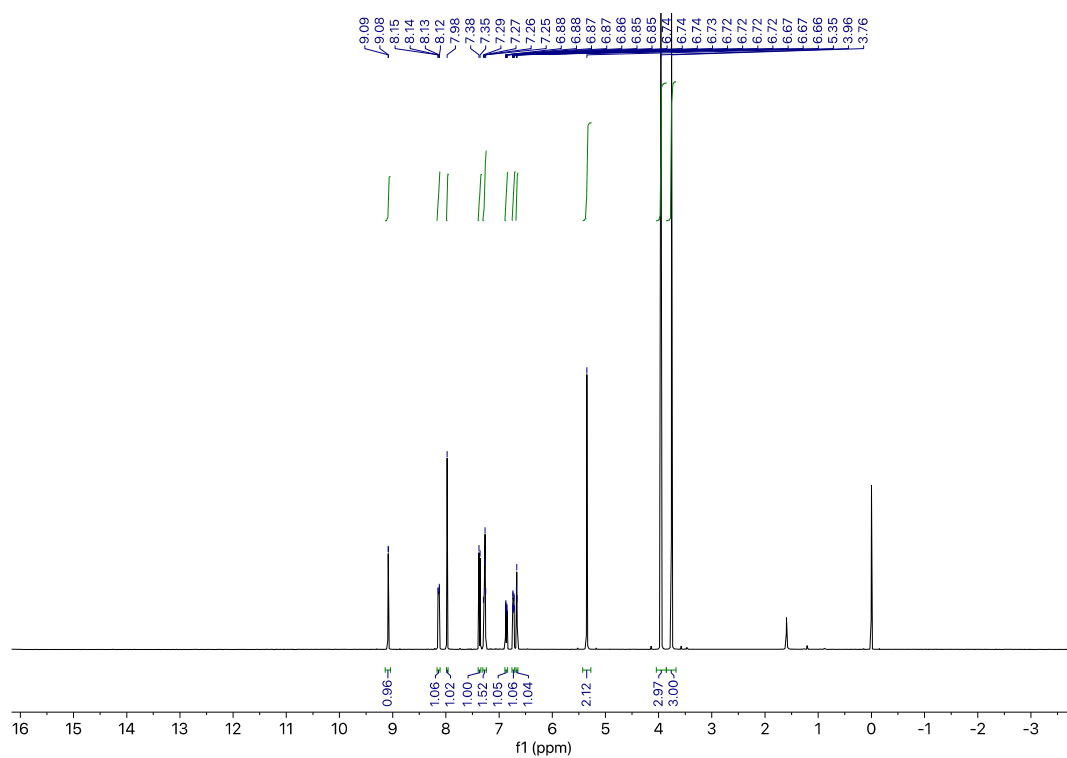

$^{13}\text{C}$  NMR for methyl 1-(3-methoxybenzyl)-5-nitro-1*H*-indole-3-carboxylate (**17j**)

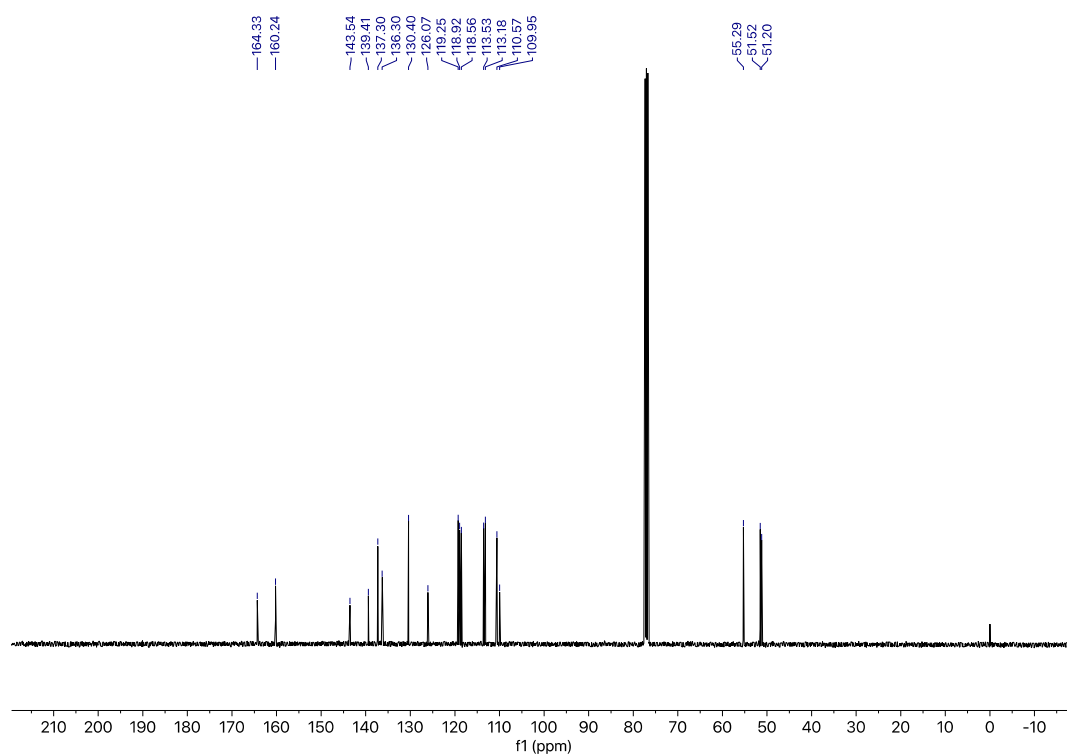



$^1\text{H}$  NMR for Methyl 1-(4-methoxybenzyl)-5-nitro-1*H*-indole-3-carboxylate (**17k**)

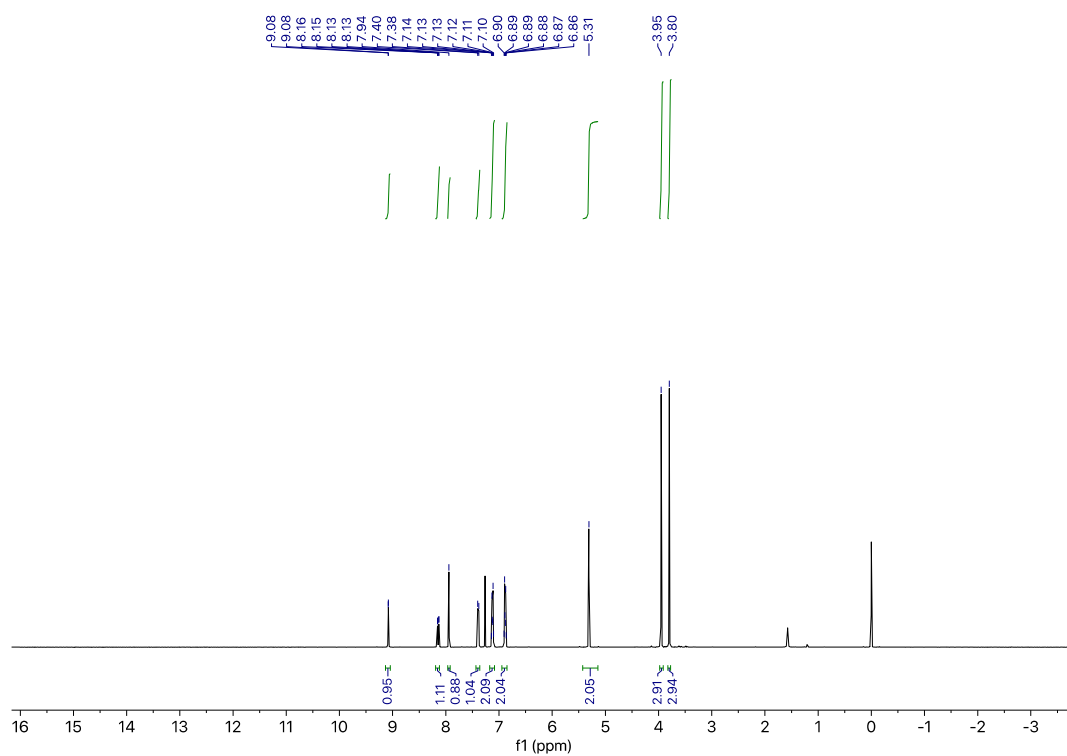

$^{13}\text{C}$  NMR for methyl 1-(4-methoxybenzyl)-5-nitro-1*H*-indole-3-carboxylate (**17k**)

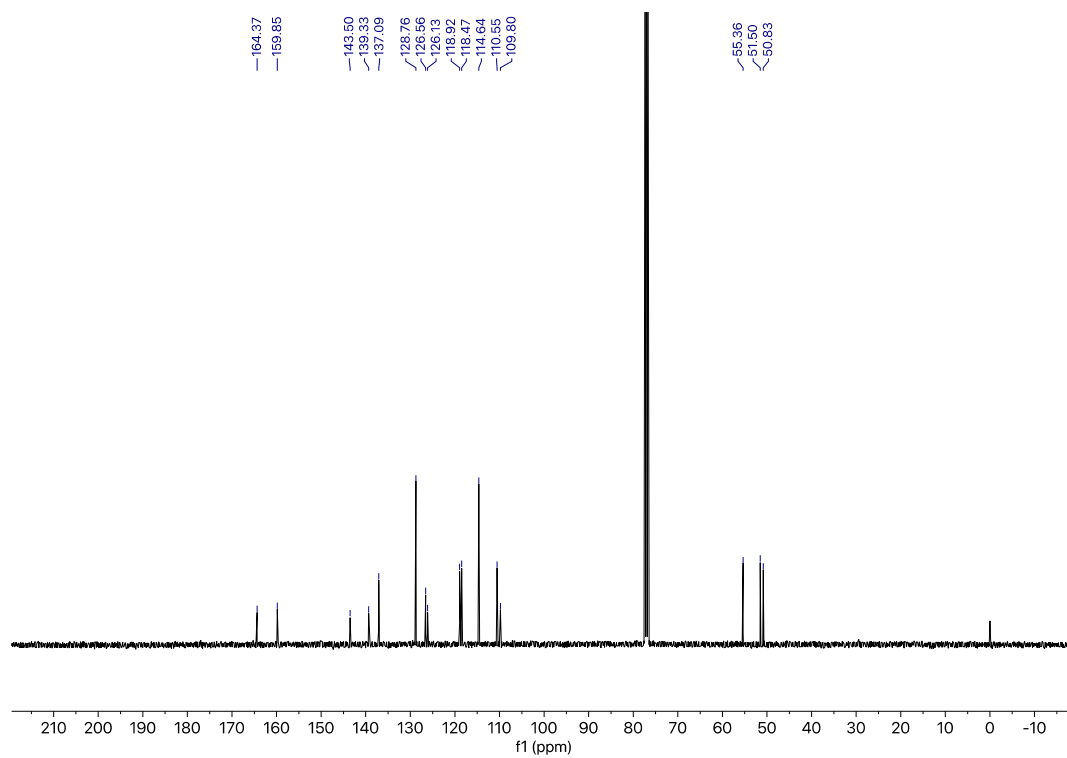

$^1\text{H}$  NMR for Methyl 1-(4-chlorobenzyl)-5-nitro-1*H*-indole-3-carboxylate (**171**)

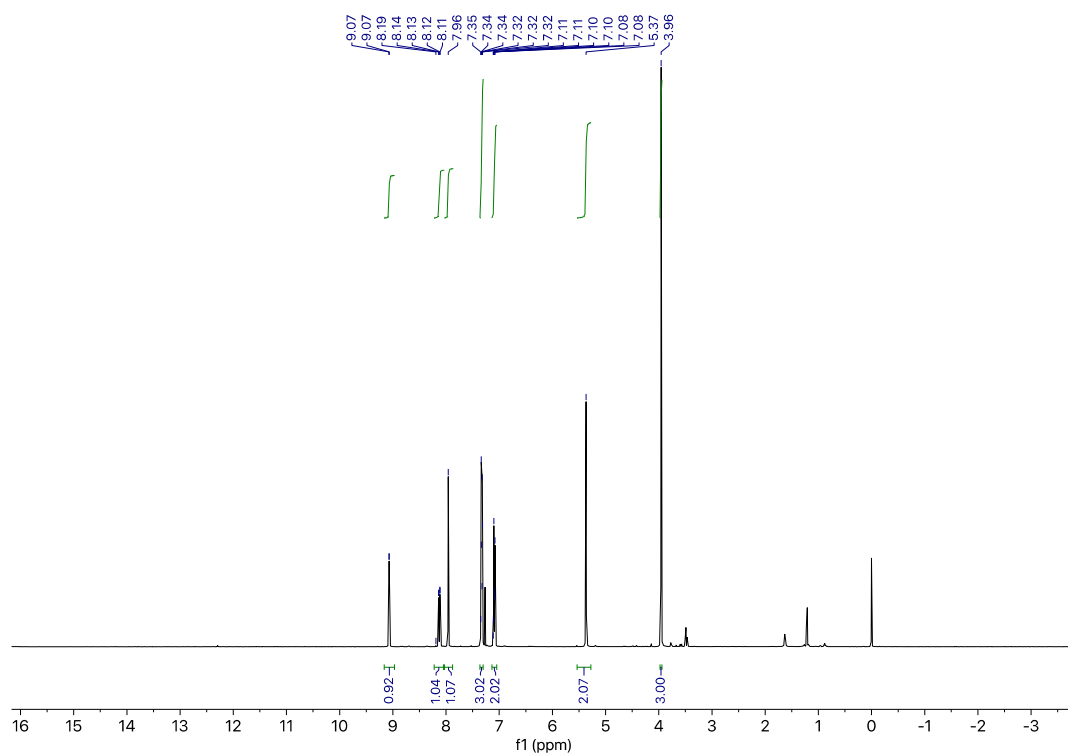

$^{13}\text{C}$  NMR for Methyl 1-(4-chlorobenzyl)-5-nitro-1*H*-indole-3-carboxylate (**171**)

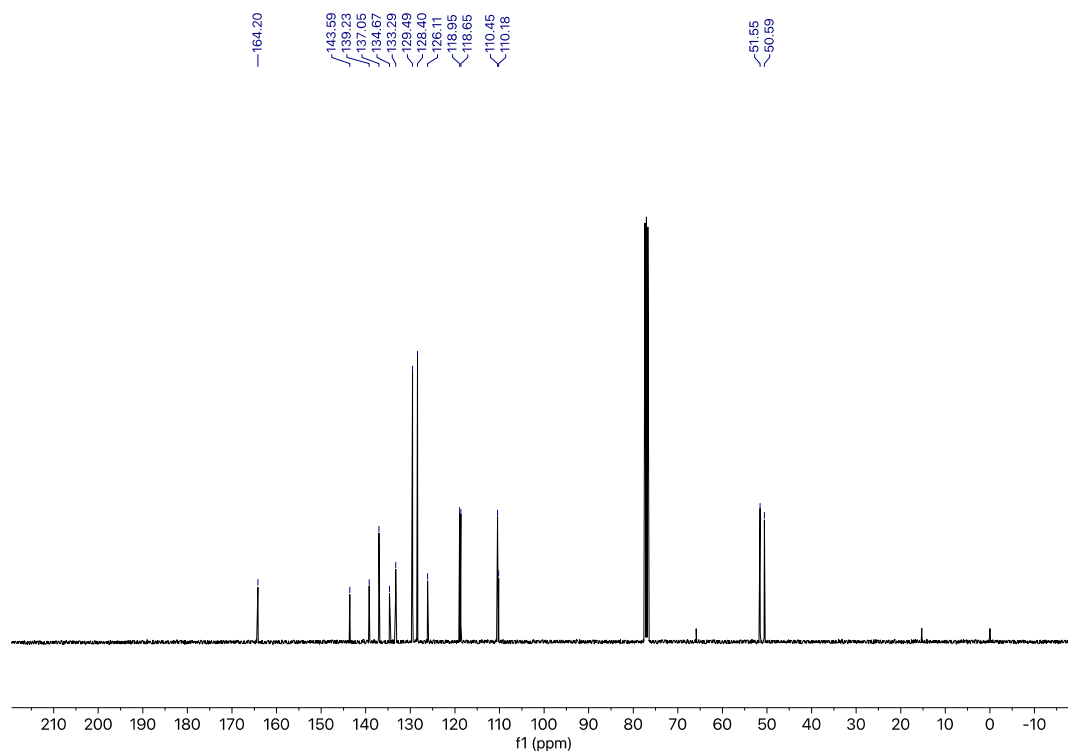

$^1\text{H}$  NMR for methyl 5-nitro-1-((4-trifluoromethyl)benzyl)-1*H*-indole-3-carboxylate (**17m**)

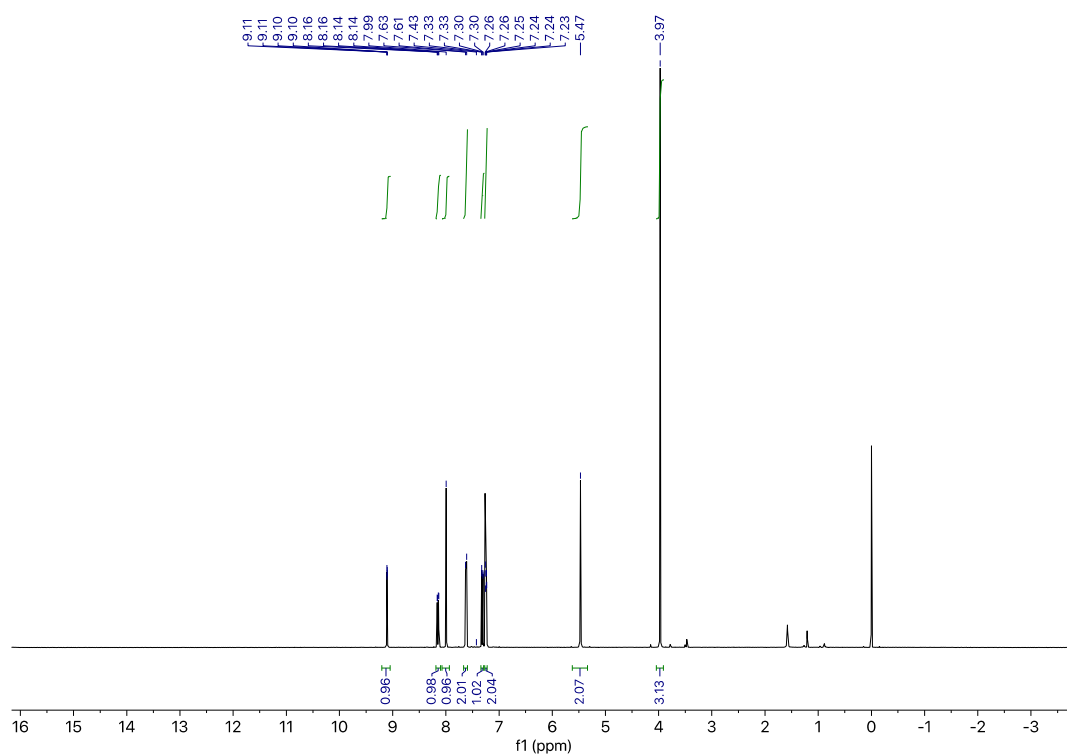

$^{13}\text{C}$  NMR for methyl 5-nitro-1-((4-trifluoromethyl)benzyl)-1*H*-indole-3-carboxylate (**17m**)

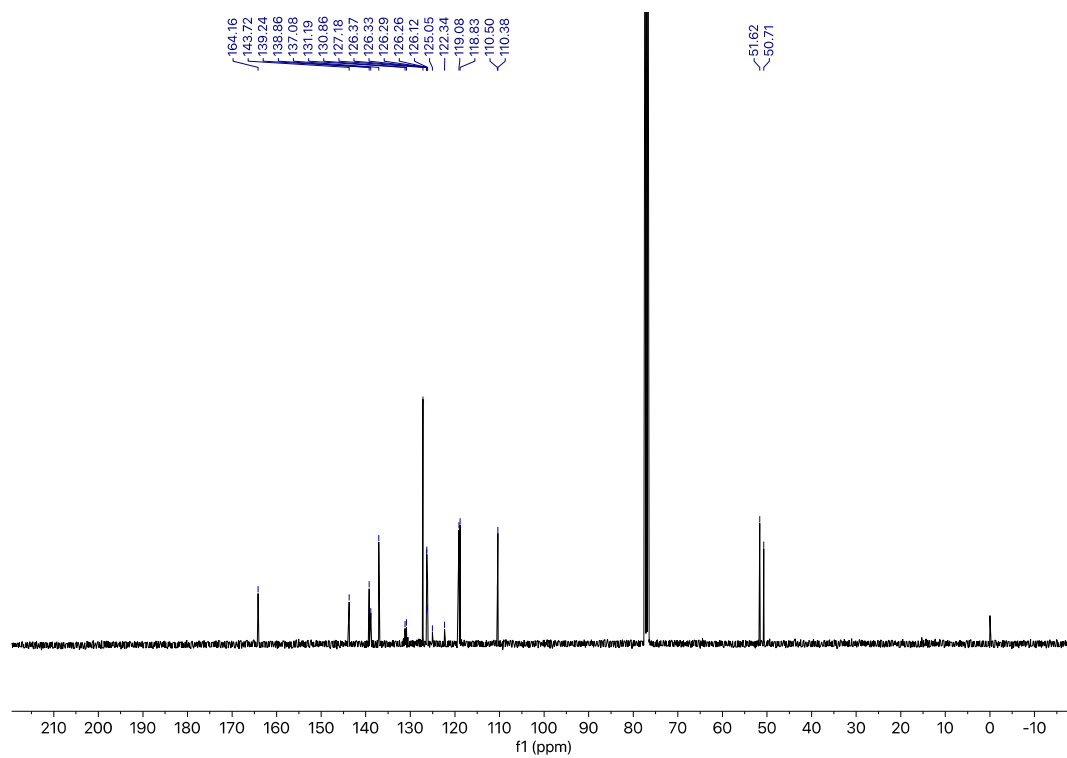

<sup>1</sup>H NMR for methyl 5-nitro-1-(3-nitrobenzyl)-1*H*-indole-3-carboxylate (**17n**)

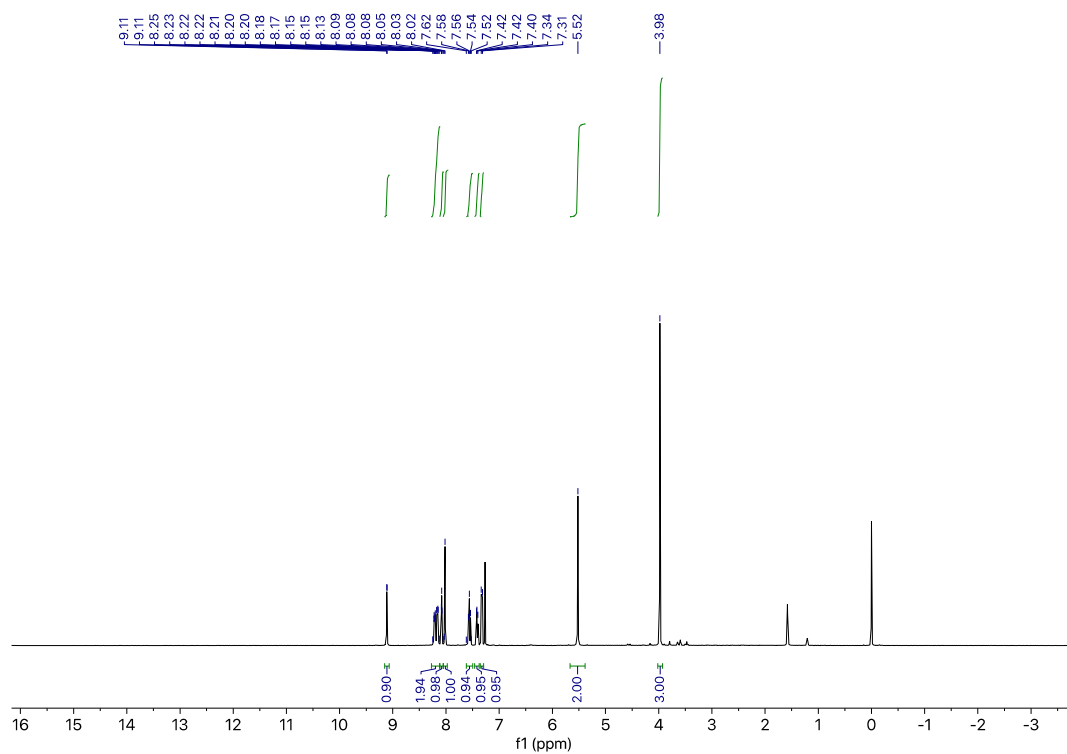

<sup>13</sup>C NMR for methyl 5-nitro-1-(3-nitrobenzyl)-1*H*-indole-3-carboxylate (**17n**)

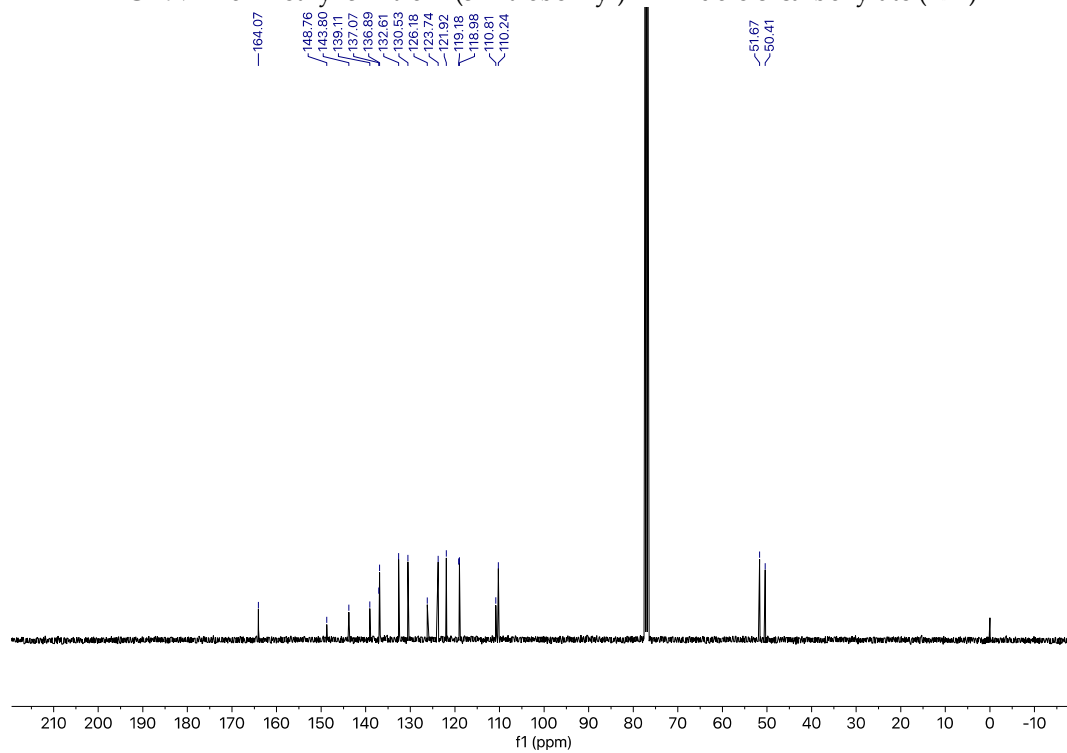

$^1\text{H}$  NMR for methyl 1-amino-5-nitro-1*H*-indole-3-carboxylate (**17o**)

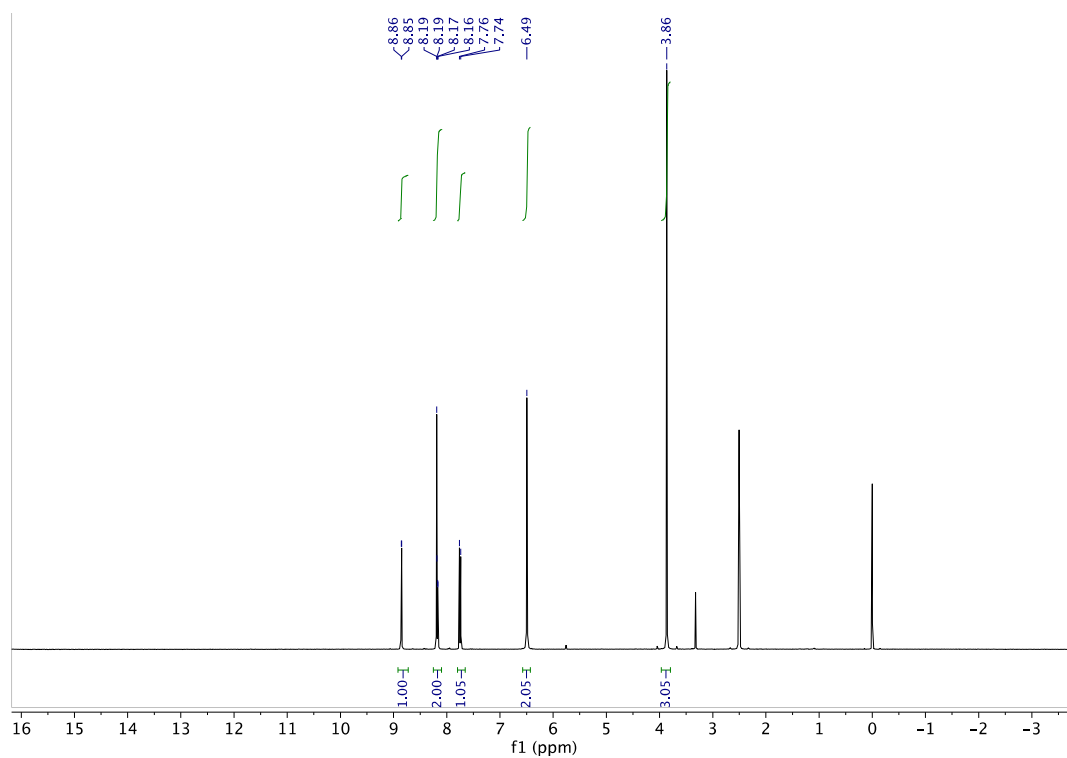

$^{13}\text{C}$  NMR for methyl 1-amino-5-nitro-1*H*-indole-3-carboxylate (**17o**)

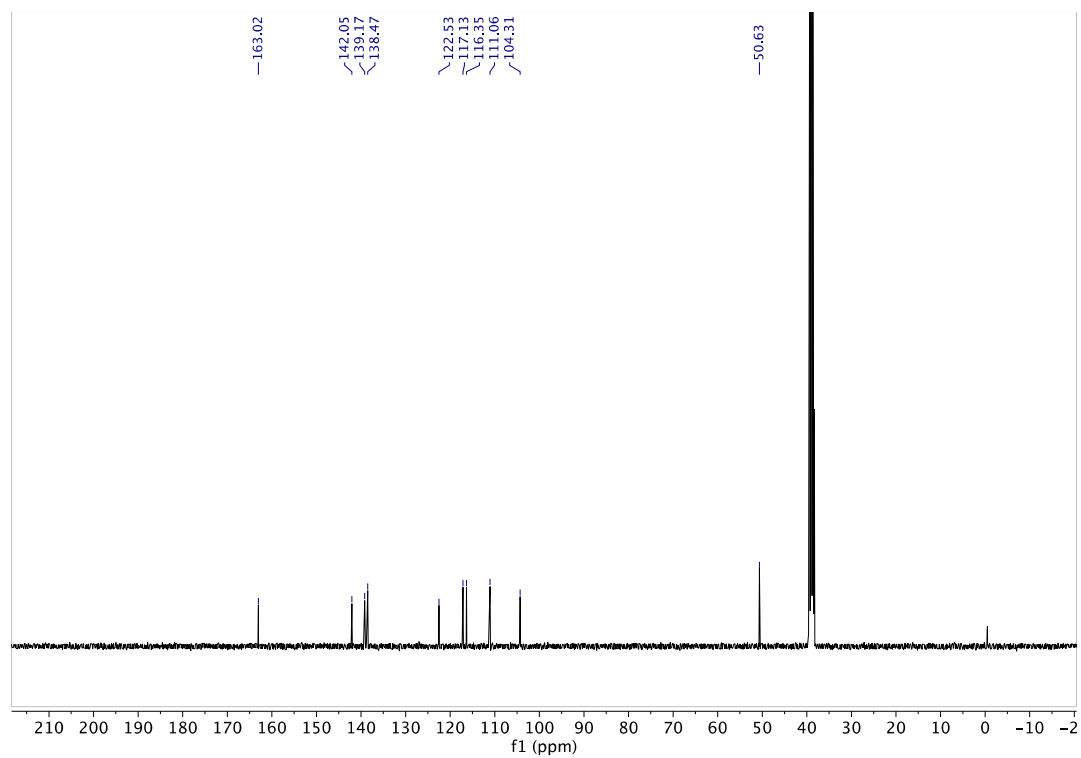

$^1\text{H}$  NMR for methyl 5-cyano-1-hexyl-1*H*-indole-3-carboxylate (**18a**)

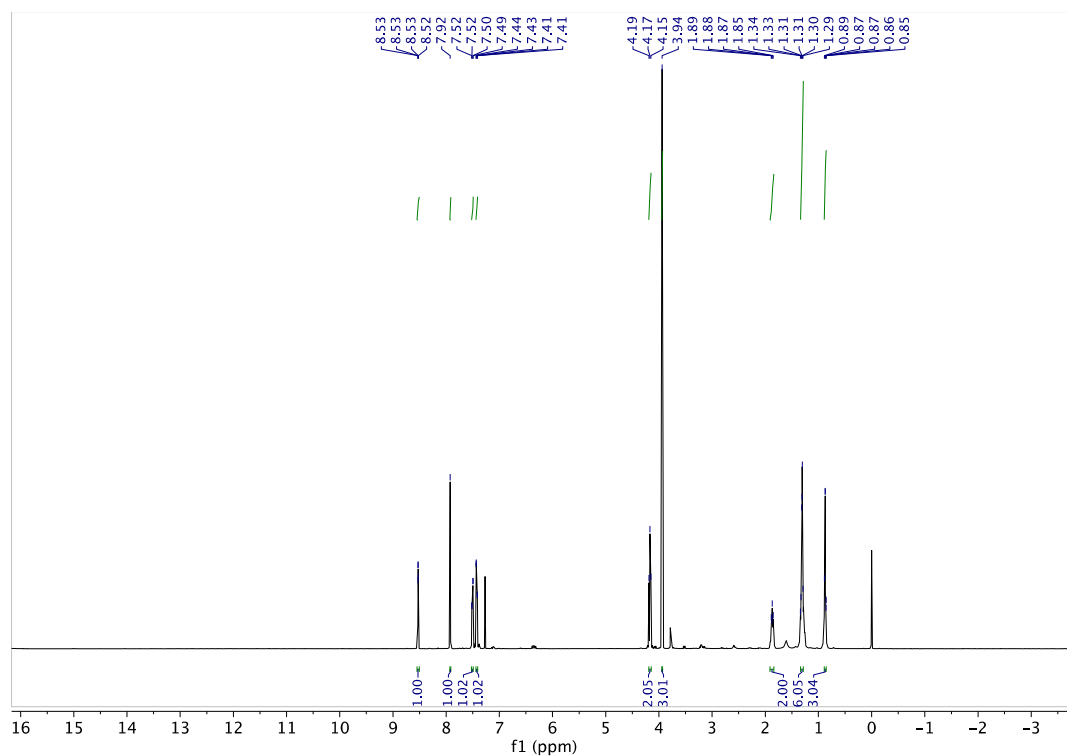

$^{13}\text{C}$  NMR for methyl 5-cyano-1-hexyl-1*H*-indole-3-carboxylate (**18a**)

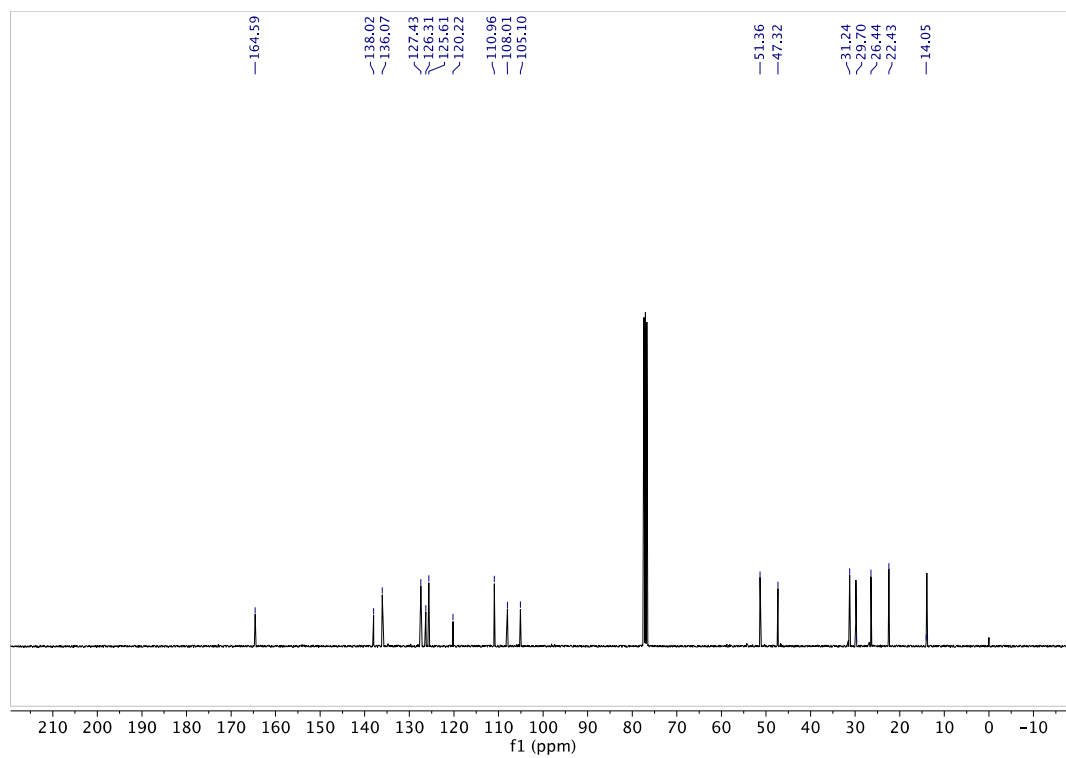

$^1\text{H}$  NMR for methyl 5-cyano-1-isobutyl-1*H*-indole-3-carboxylate (**18b**)

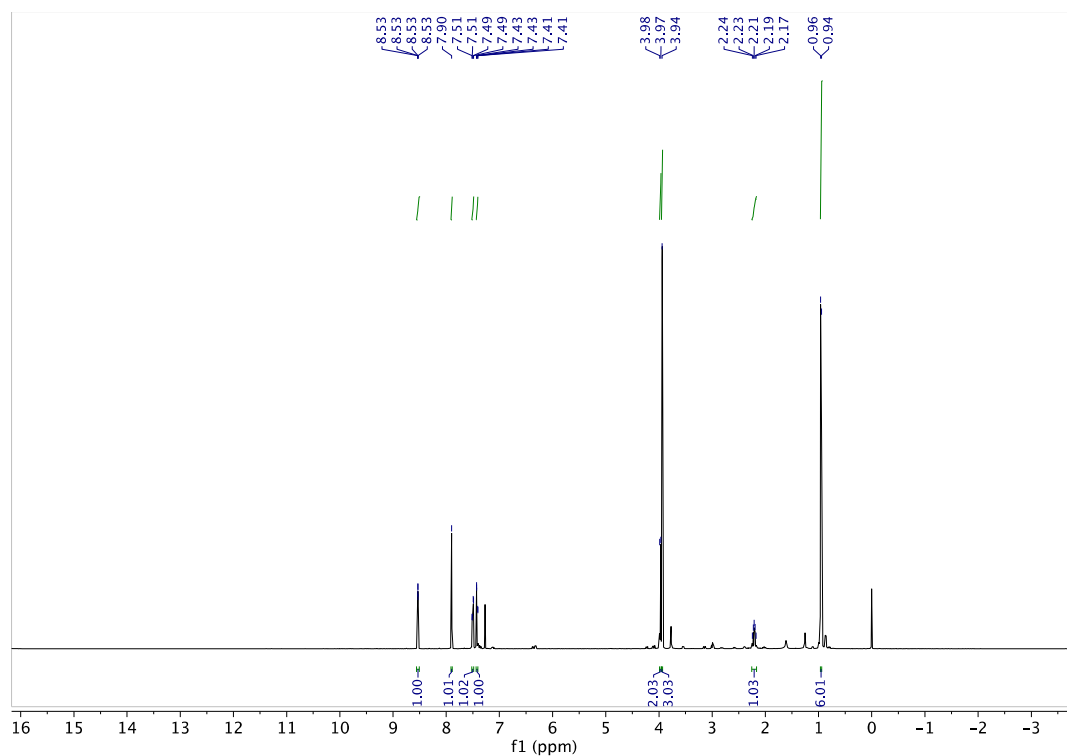

$^{13}\text{C}$  NMR for methyl 5-cyano-1-isobutyl-1*H*-indole-3-carboxylate (**18b**)

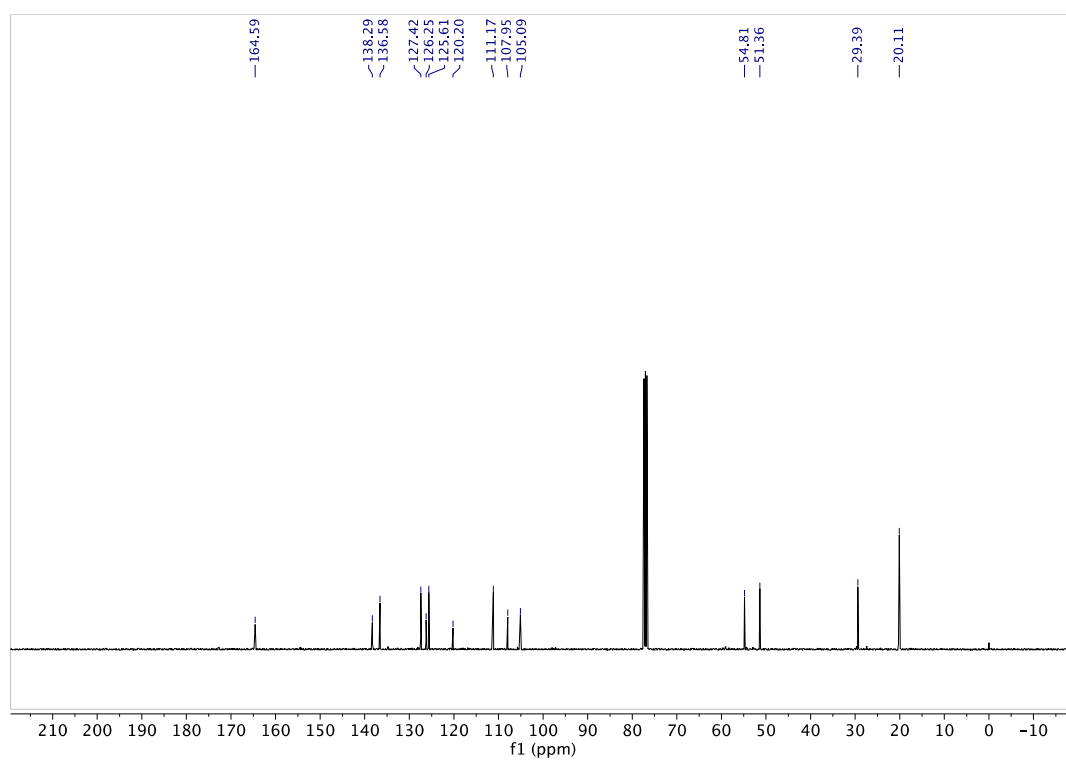

$^1\text{H}$  NMR for methyl 5-cyano-1-cyclopropyl-1*H*-indole-3-carboxylate (**18d**)

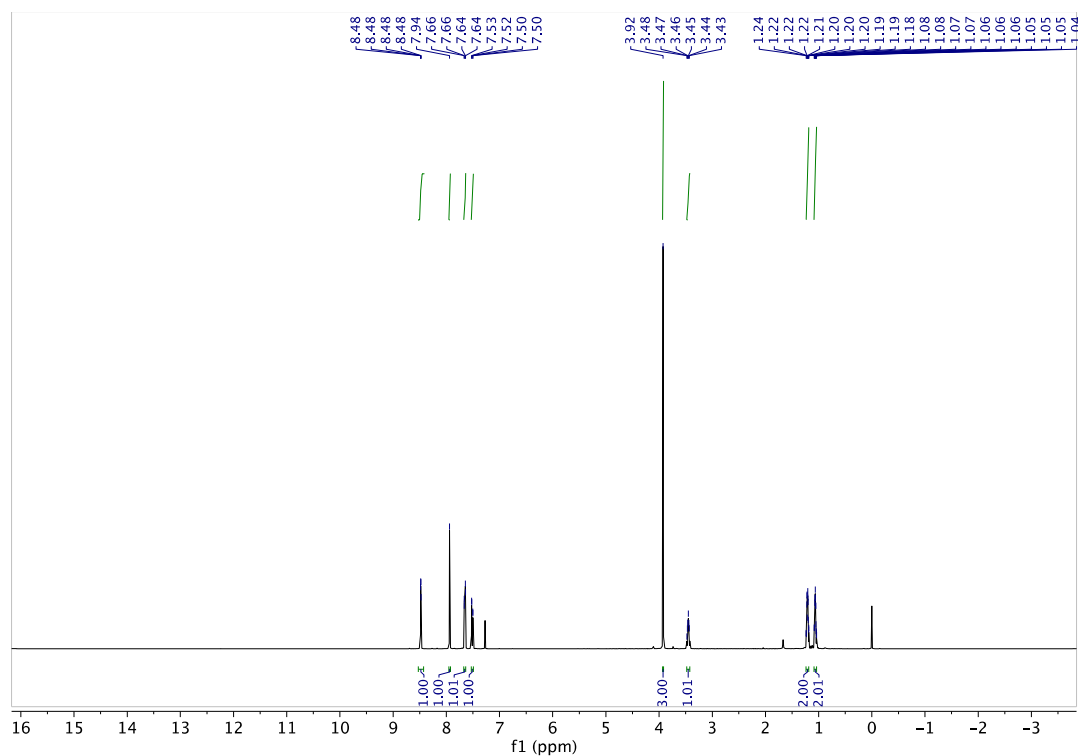

$^{13}\text{C}$  NMR for methyl 5-cyano-1-cyclopropyl-1*H*-indole-3-carboxylate (**18d**)

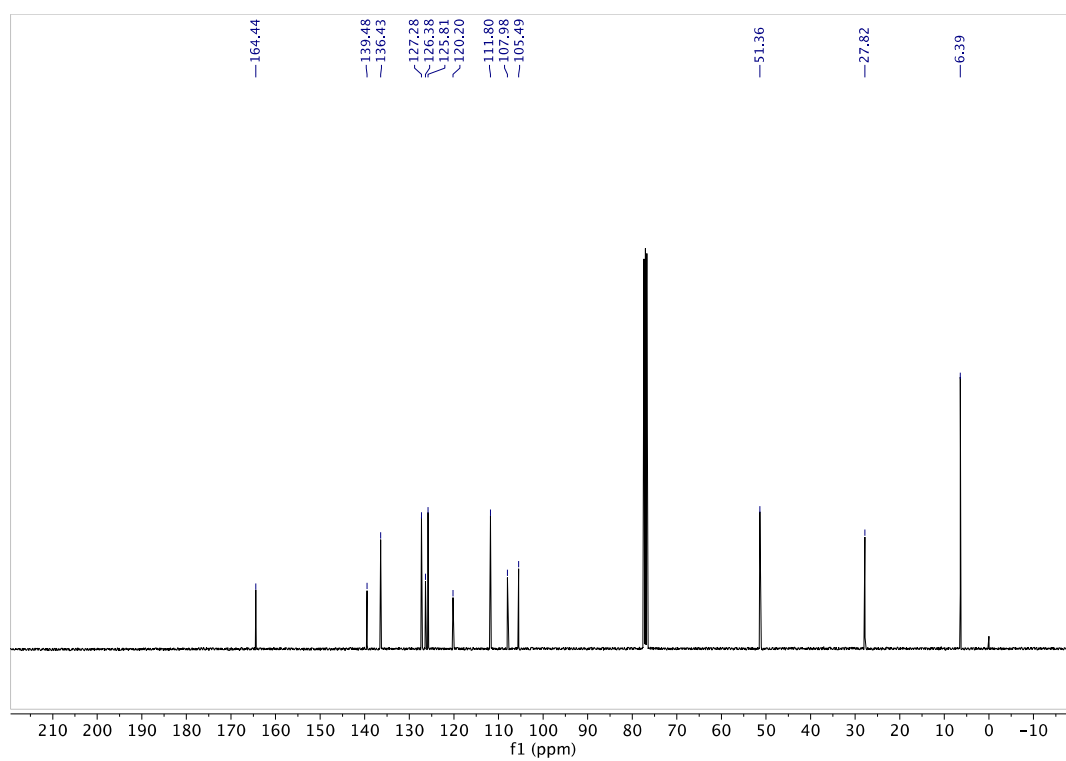



$^1\text{H}$  NMR for methyl 5-cyano-1-cyclohexyl-1*H*-indole-3-carboxylate (**18e**)

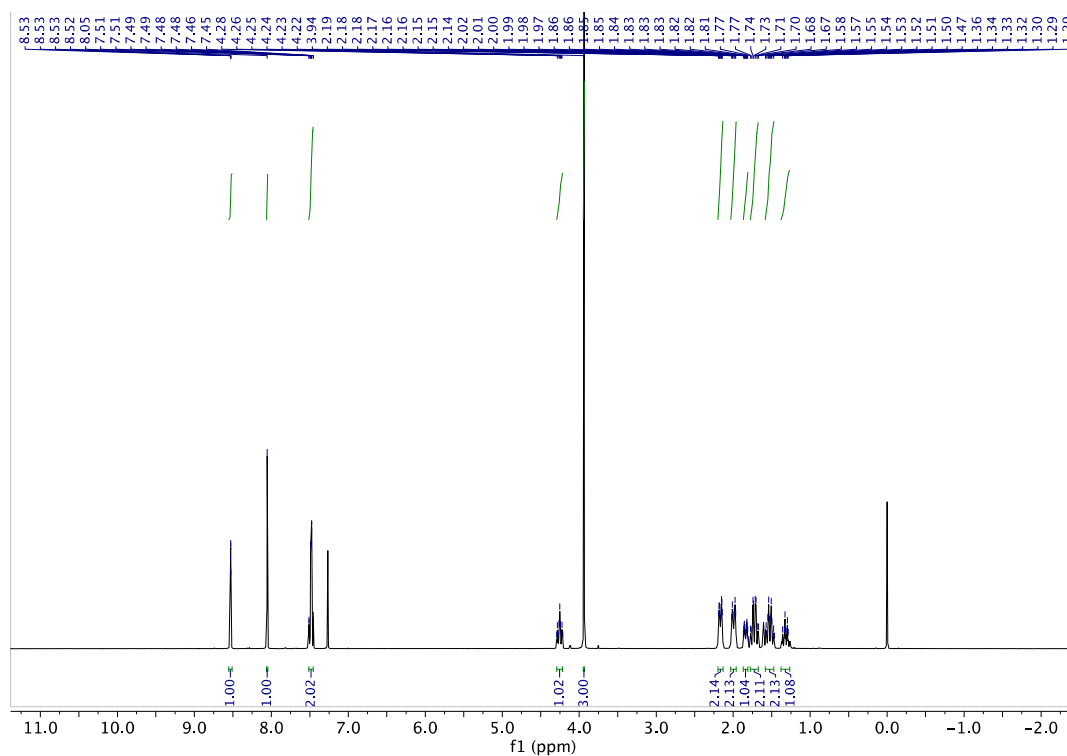

$^{13}\text{C}$  NMR for methyl 5-cyano-1-cyclohexyl-1*H*-indole-3-carboxylate (**18e**)

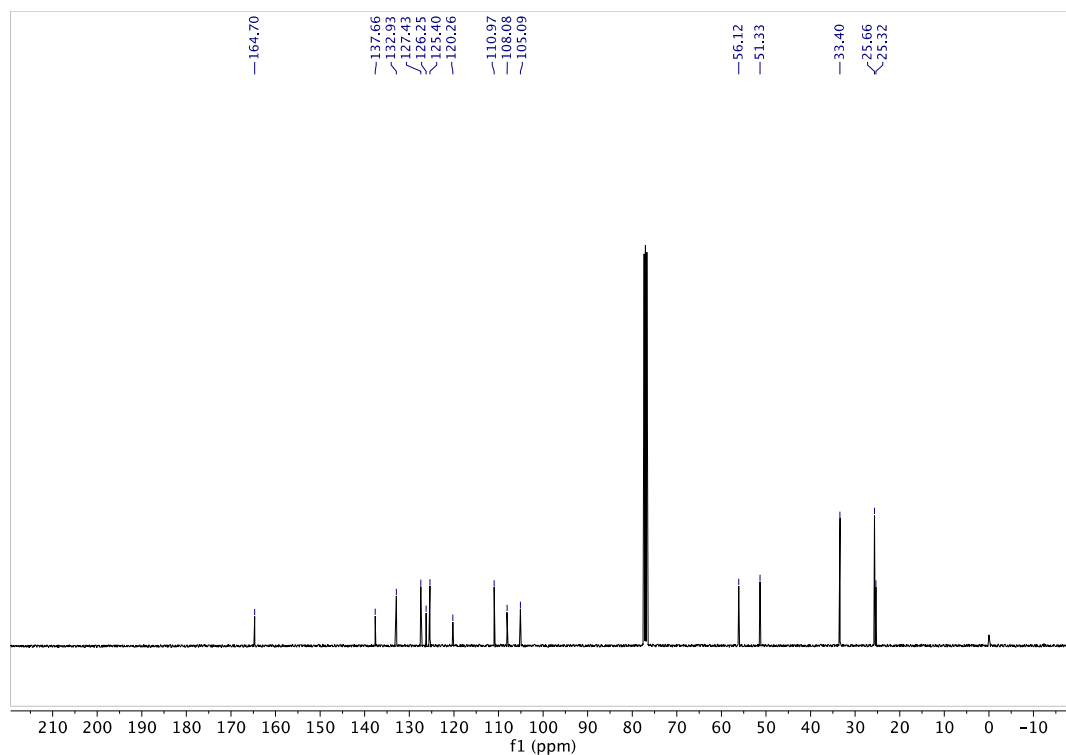

$^1\text{H}$  NMR for methyl 5-cyano-1-phenethyl-1*H*-indole-3-carboxylate (**18g**)

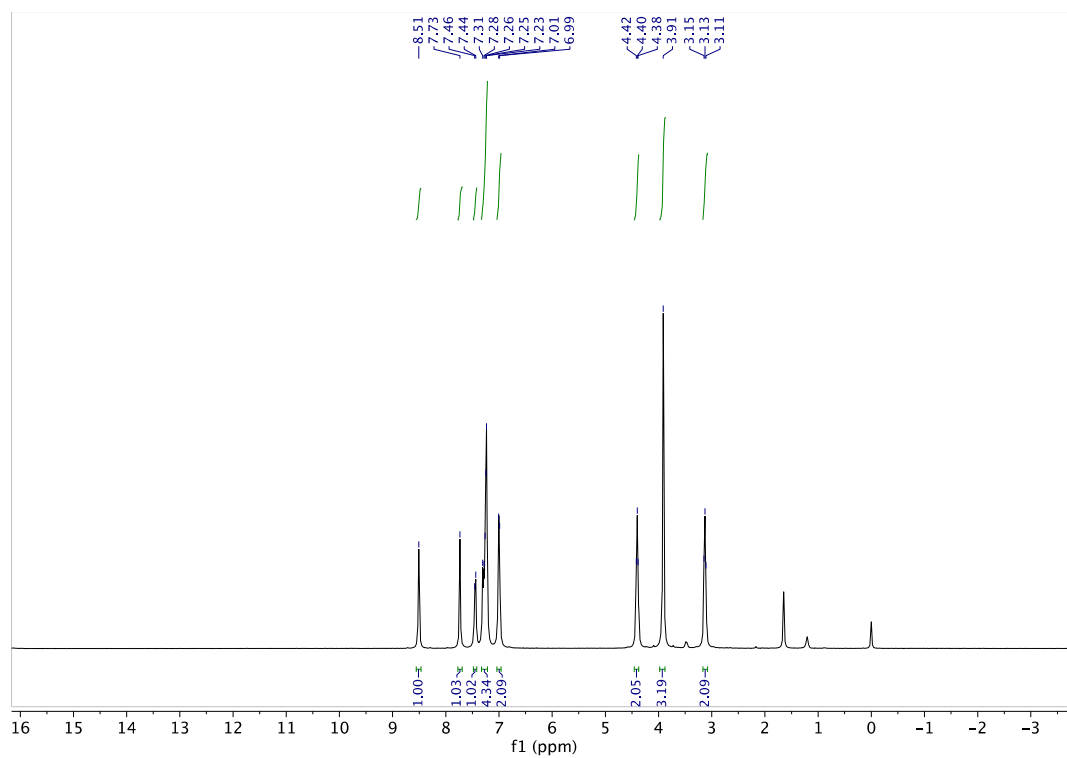

$^{13}\text{C}$  NMR for methyl 5-cyano-1-phenethyl-1*H*-indole-3-carboxylate (**18g**)

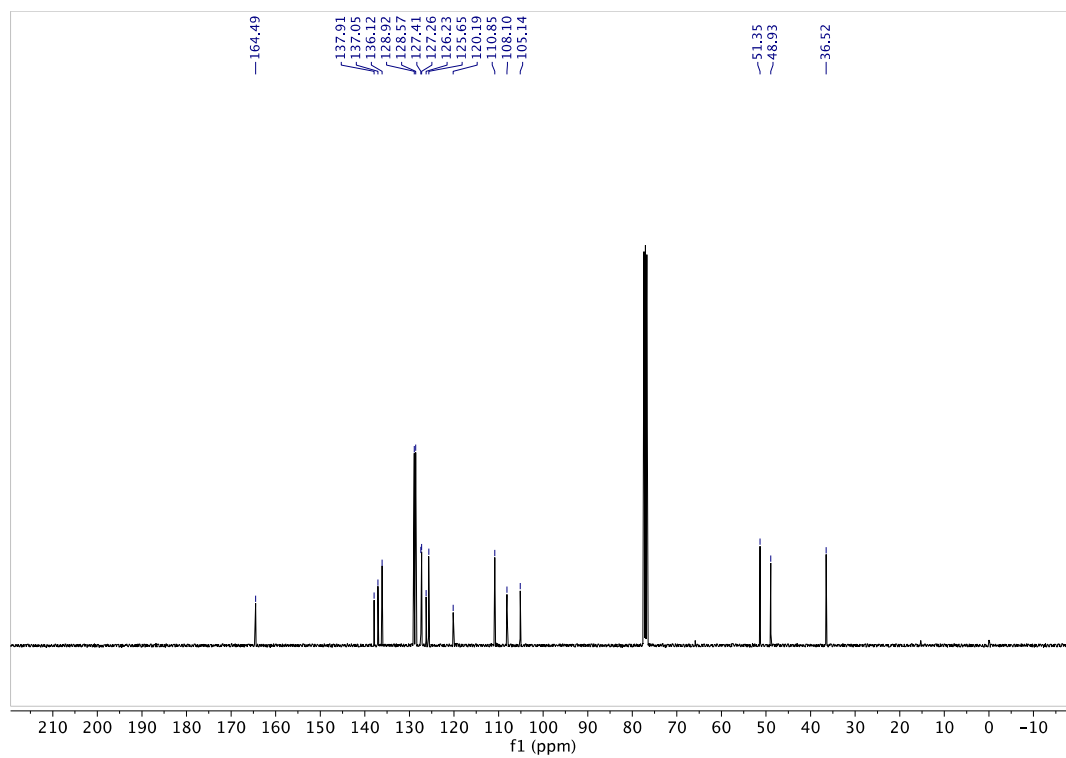

$^1\text{H}$  NMR for methyl 1-benzyl-5-cyano-1*H*-indole-3-carboxylate (**18h**)

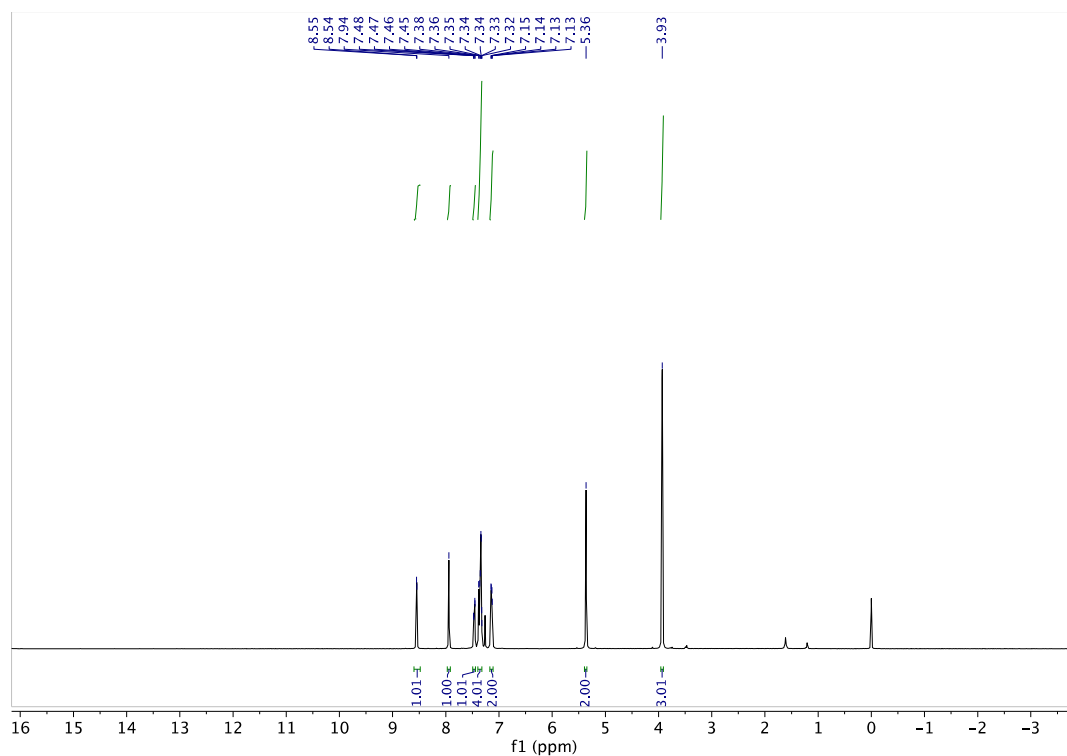

$^{13}\text{C}$  NMR for methyl 1-benzyl-5-cyano-1*H*-indole-3-carboxylate (**18h**)

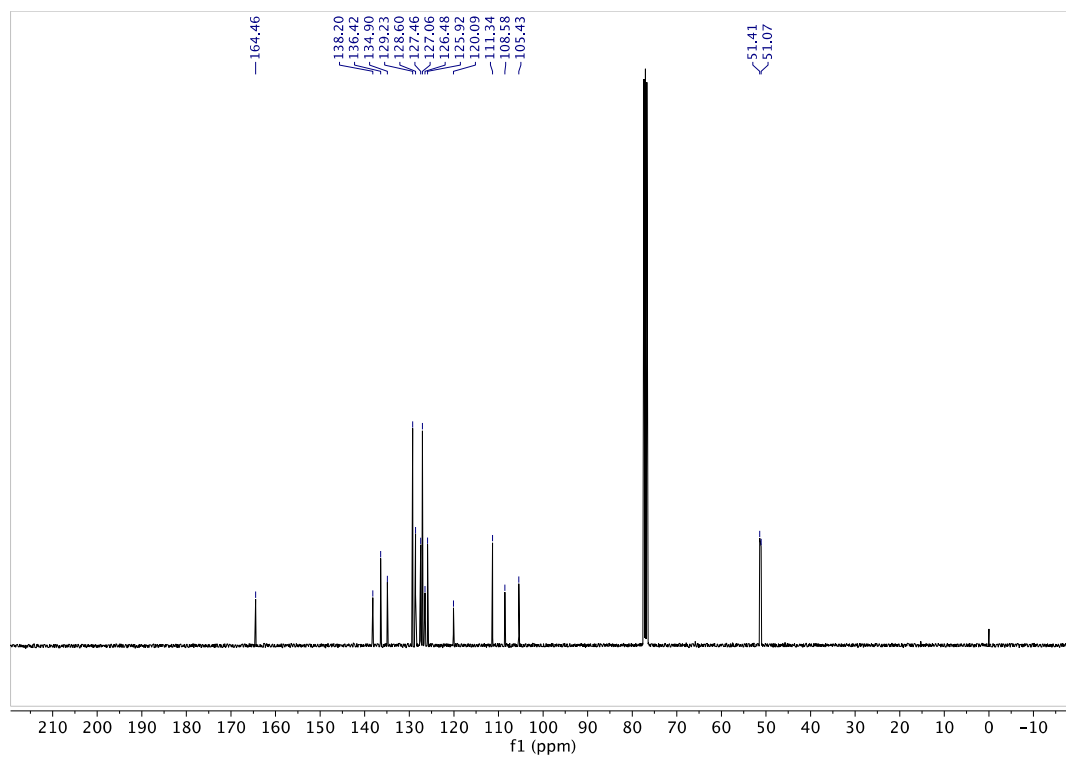

$^1\text{H}$  NMR for methyl 5-cyano-1-(4-methylbenzyl)-1*H*-indole-3-carboxylate (**18i**)

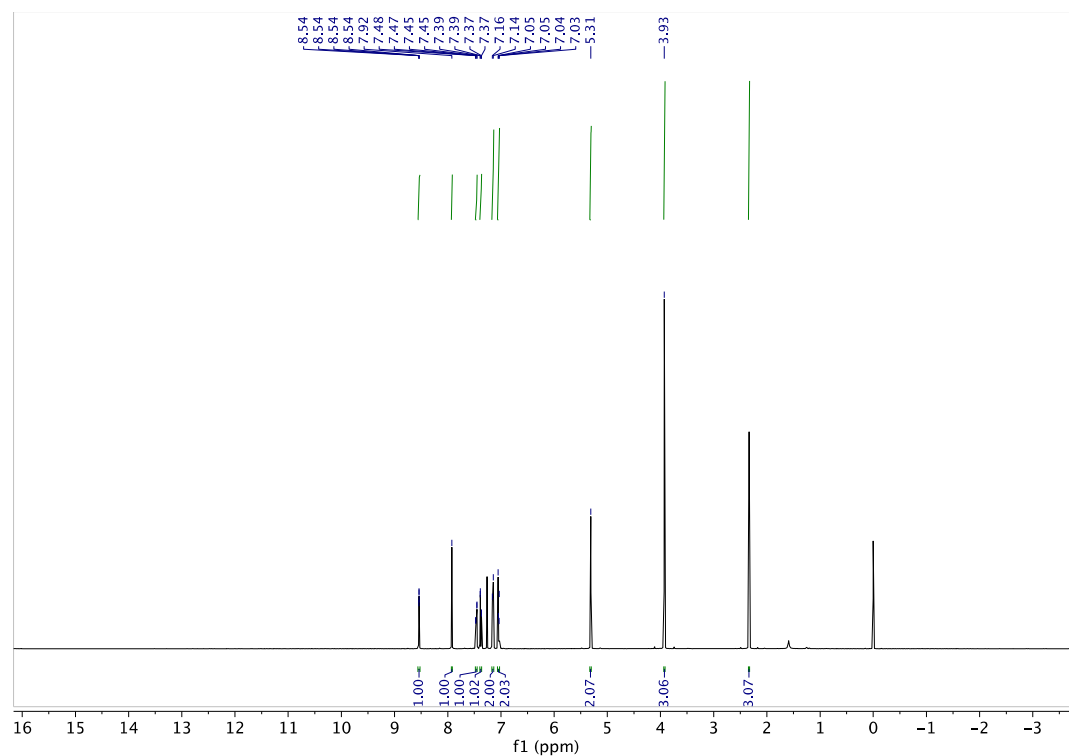

$^{13}\text{C}$  NMR for methyl 5-cyano-1-(4-methylbenzyl)-1*H*-indole-3-carboxylate (**18i**)

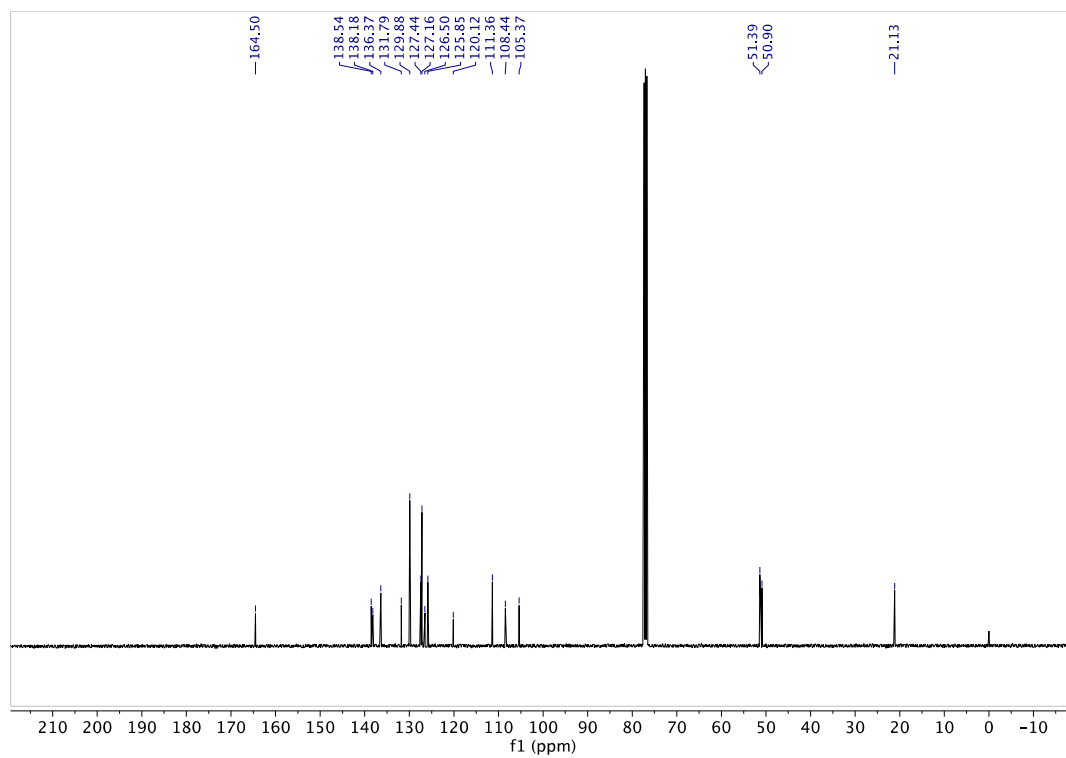

$^1\text{H}$  NMR for methyl 5-cyano-1-(3-methoxyphenyl)-1*H*-indole-3-carboxylate (**18j**)

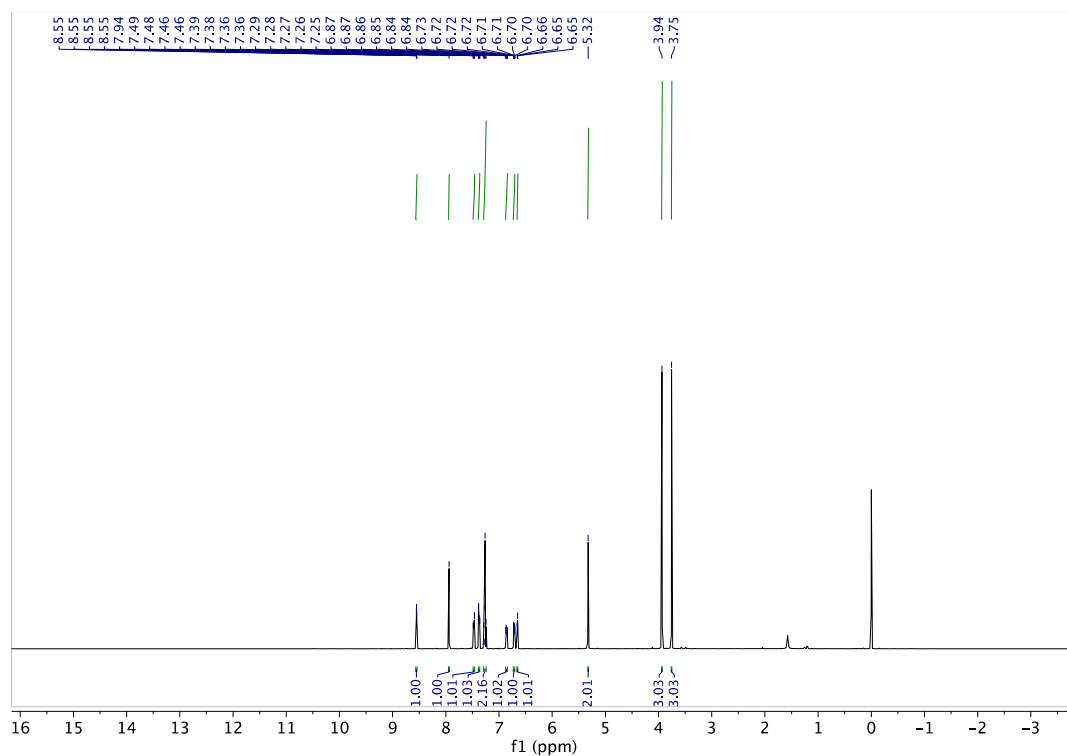

$^{13}\text{C}$  NMR for methyl 5-cyano-1-(3-methoxyphenyl)-1*H*-indole-3-carboxylate (**18j**)

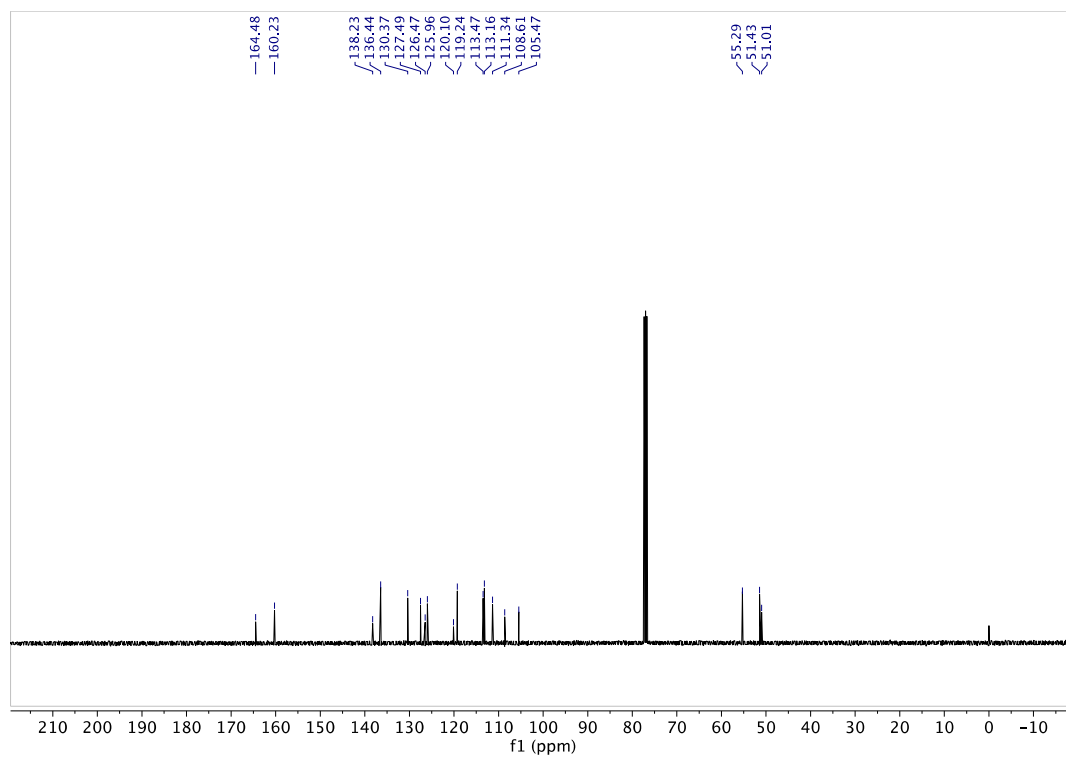

<sup>1</sup>H NMR for methyl 5-cyano-1-(4-methoxyphenyl)-1*H*-indole-3-carboxylate (**18k**)

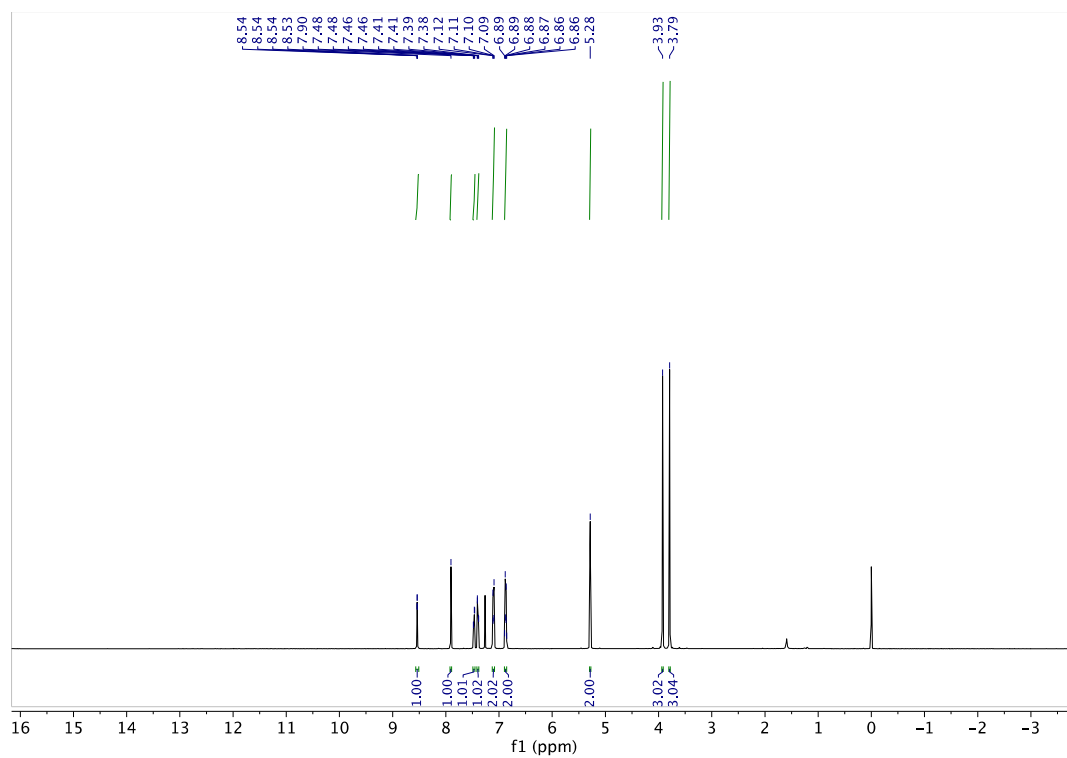

<sup>13</sup>C NMR for methyl 5-cyano-1-(4-methoxyphenyl)-1*H*-indole-3-carboxylate (**18k**)

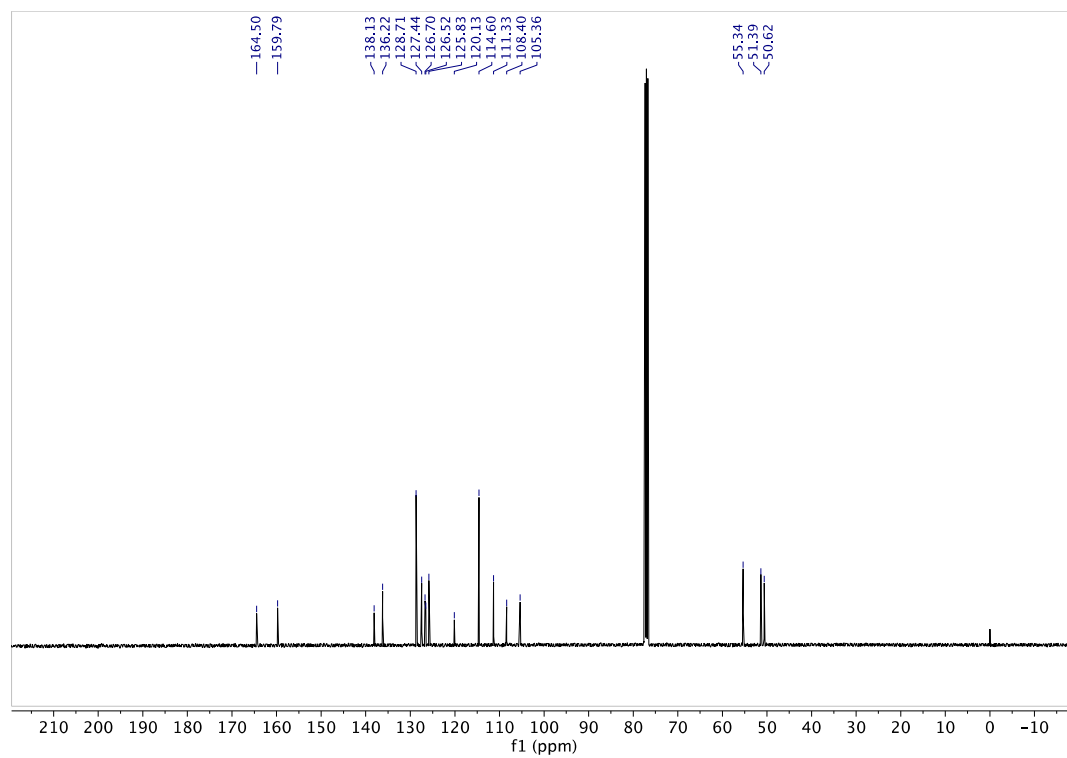

$^1\text{H}$  NMR for methyl 1-(4-chlorophenyl)-5-cyano-1*H*-indole-3-carboxylate (**181**)

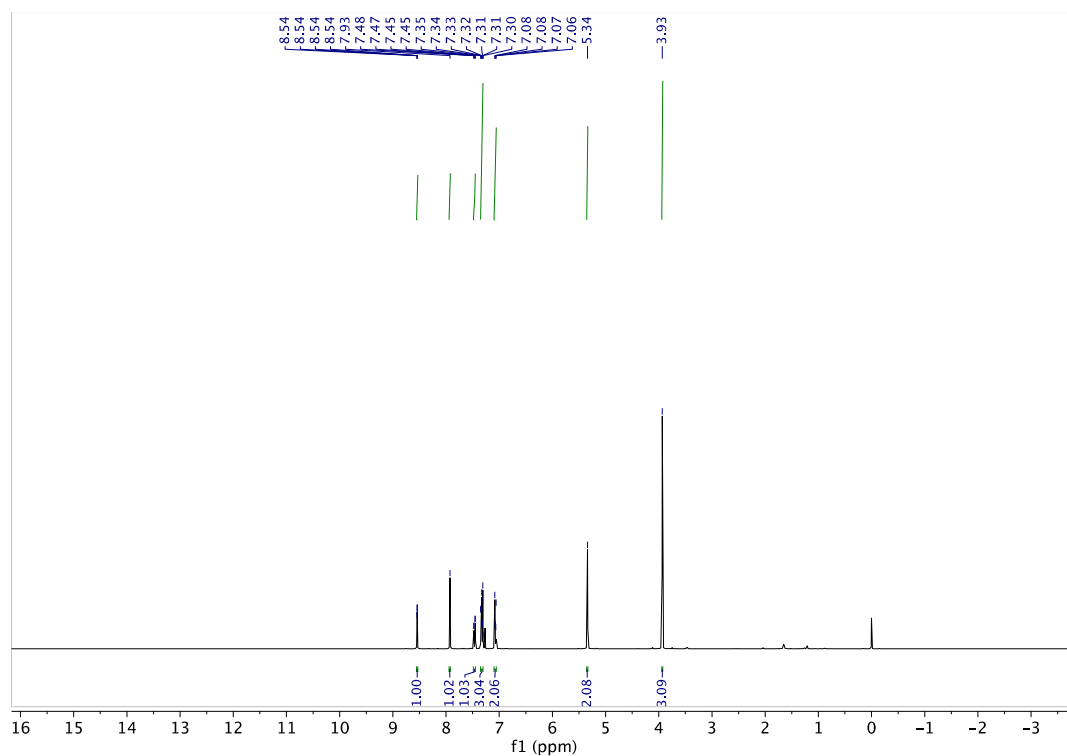

$^{13}\text{C}$  NMR for methyl 1-(4-chlorophenyl)-5-cyano-1*H*-indole-3-carboxylate (**181**)

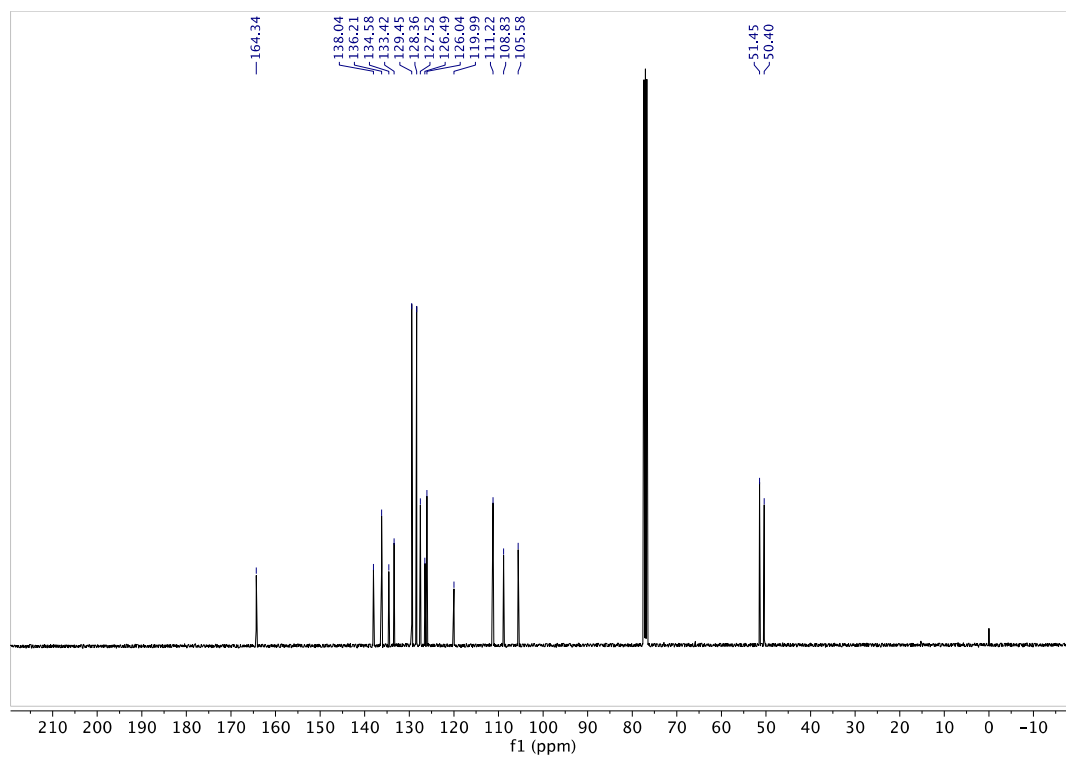

$^1\text{H}$  NMR for methyl 5-cyano-1-(3-nitrobenzyl)-1*H*-indole-3-carboxylate (**18m**)

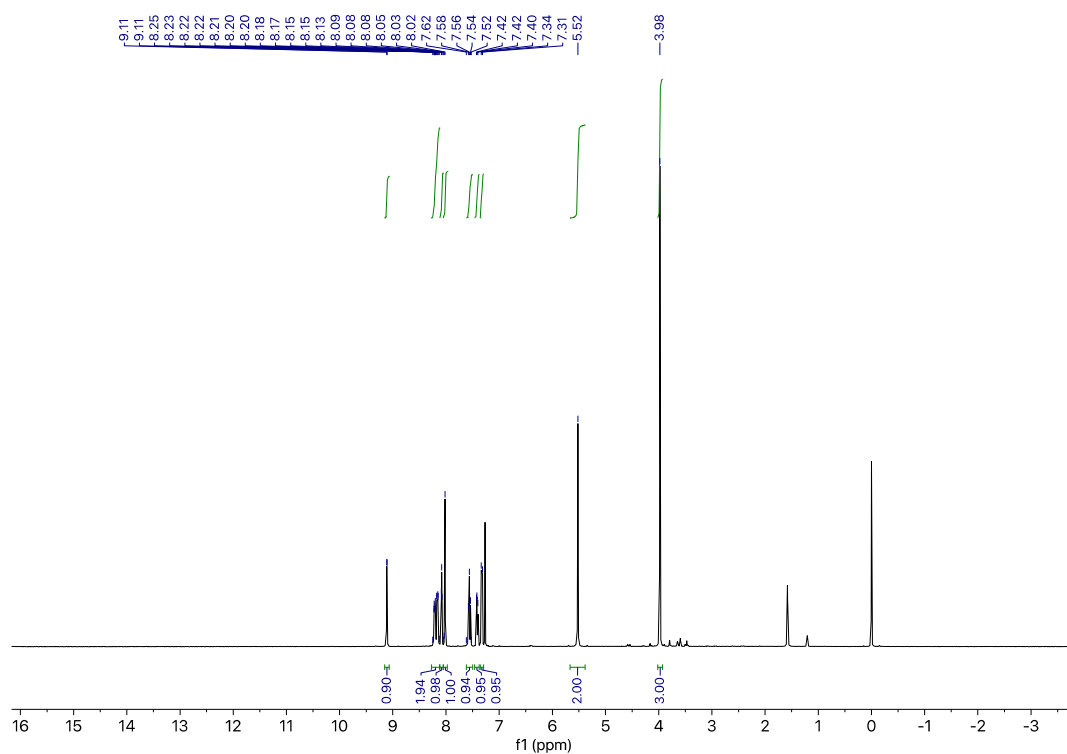

$^{13}\text{C}$  NMR for methyl 5-cyano-1-(3-nitrobenzyl)-1*H*-indole-3-carboxylate (**18m**)

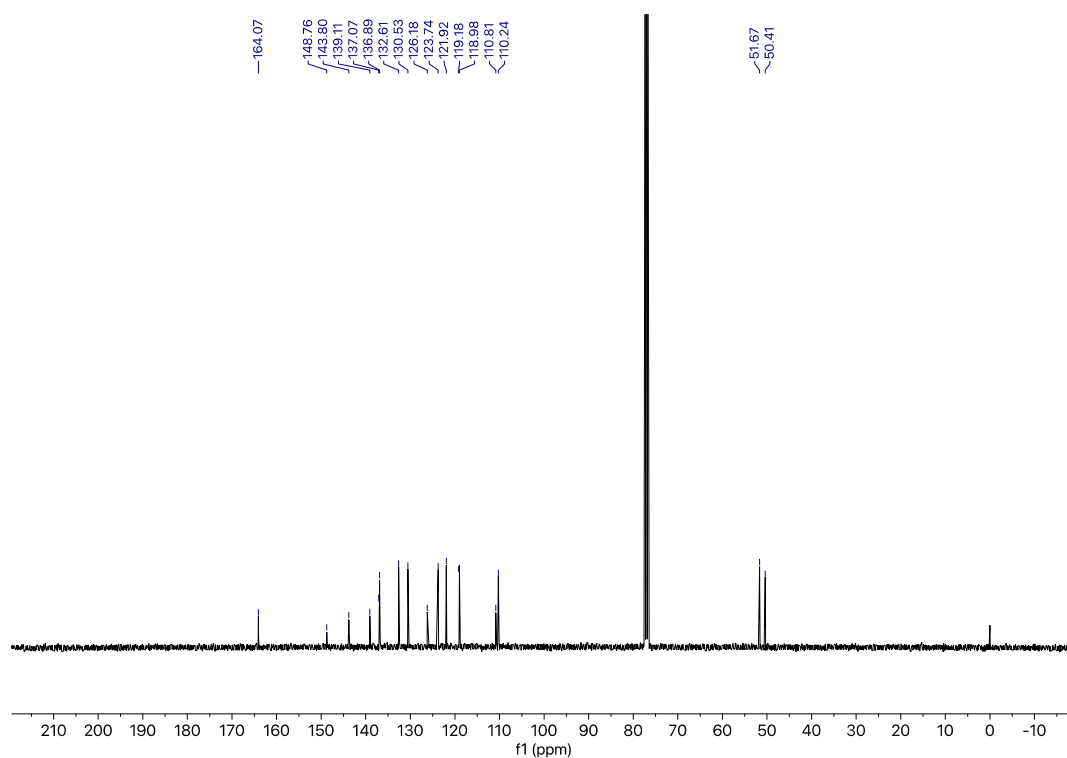



<sup>1</sup>H NMR for dimethyl 1-hexyl-1*H*-indole-3,5-dicarboxylate (**19a**)

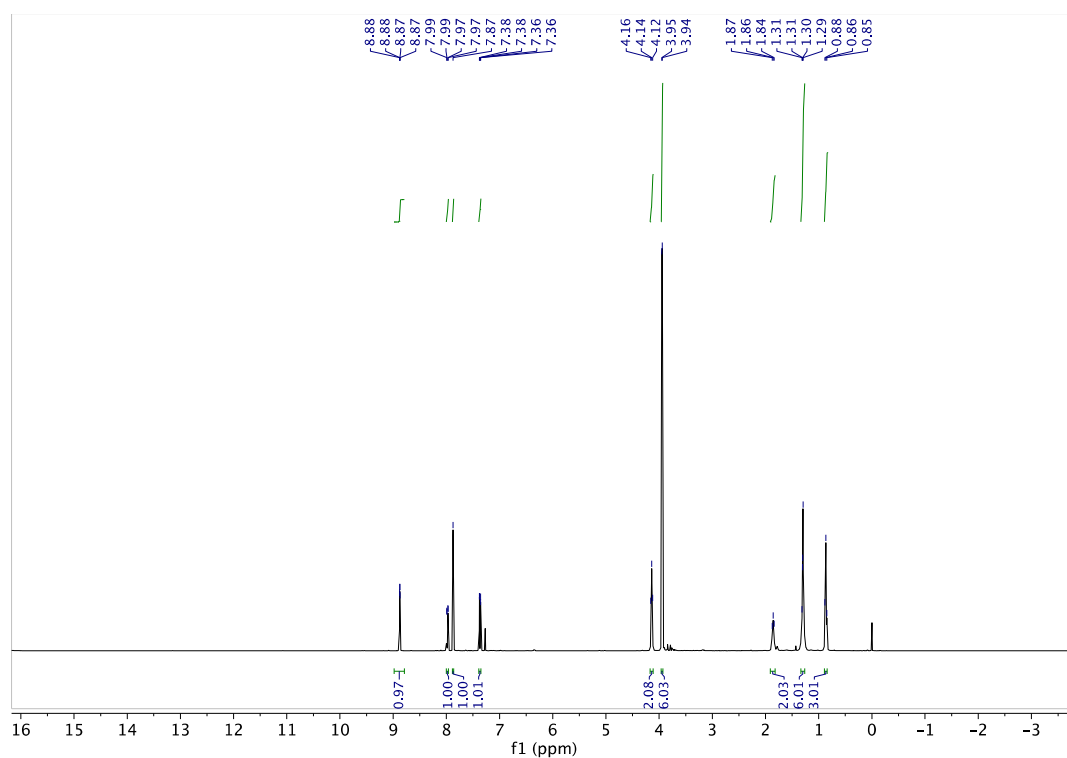

<sup>13</sup>C NMR for dimethyl 1-hexyl-1*H*-indole-3,5-dicarboxylate (**19a**)

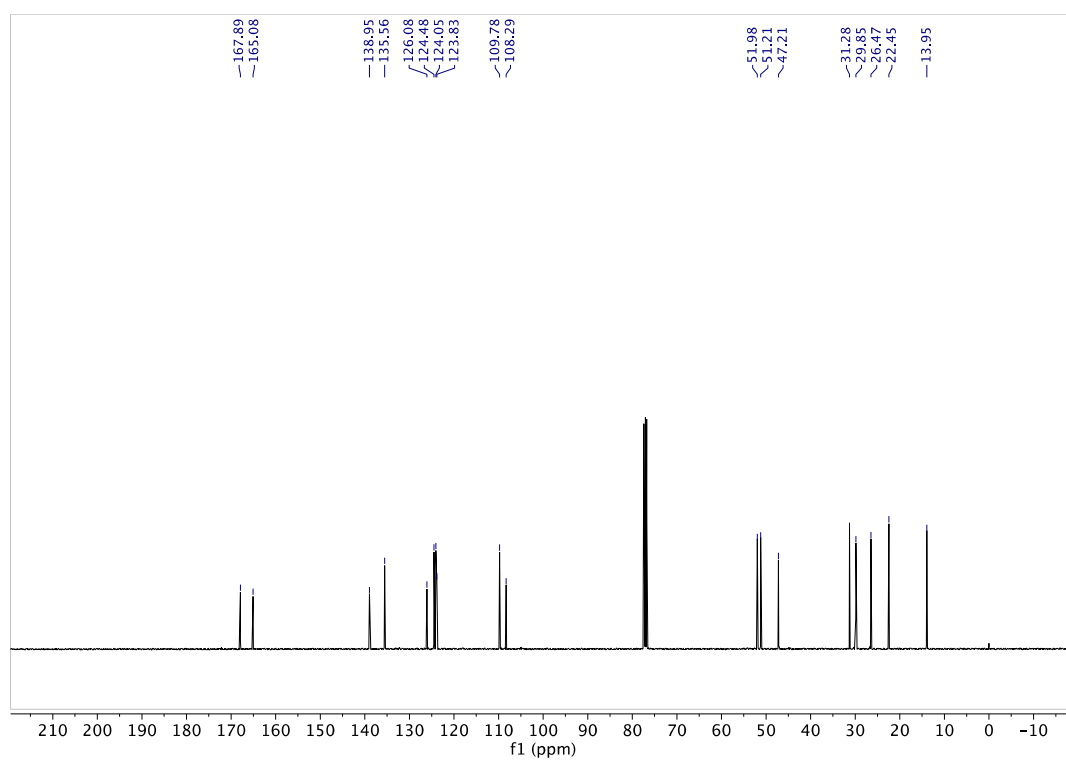

$^1\text{H}$  NMR for dimethyl 1-isobutyl-1*H*-indole-3,5-dicarboxylate (**19b**)

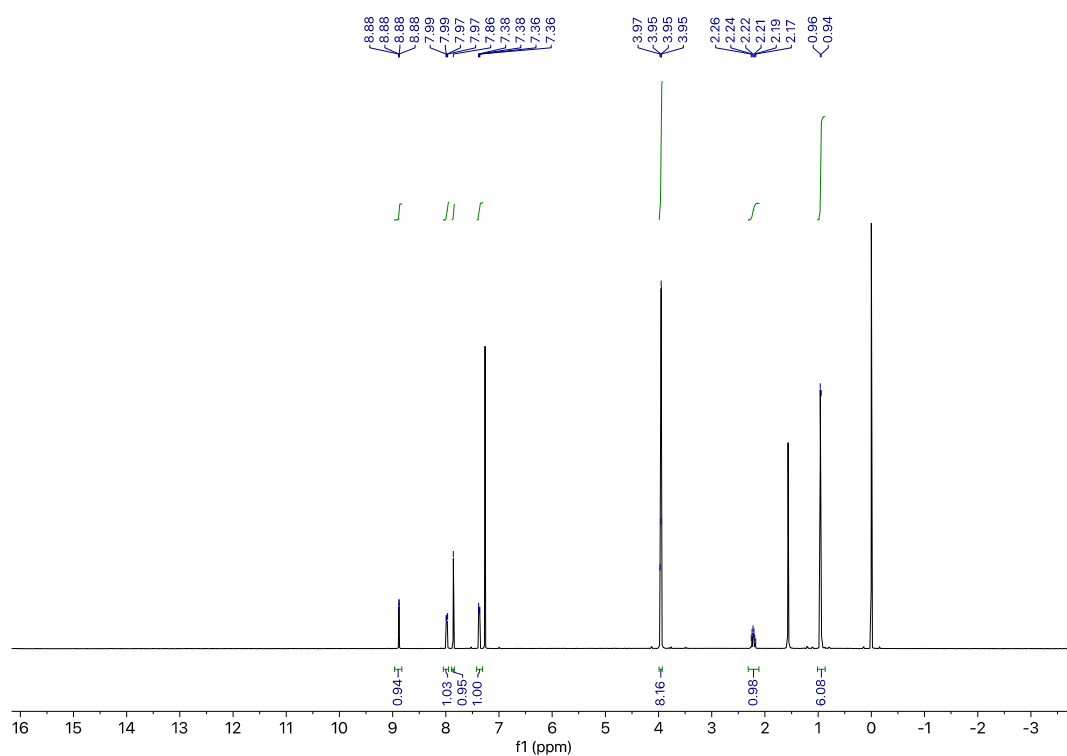

$^{13}\text{C}$  NMR for dimethyl 1-isobutyl-1*H*-indole-3,5-dicarboxylate (**19b**)

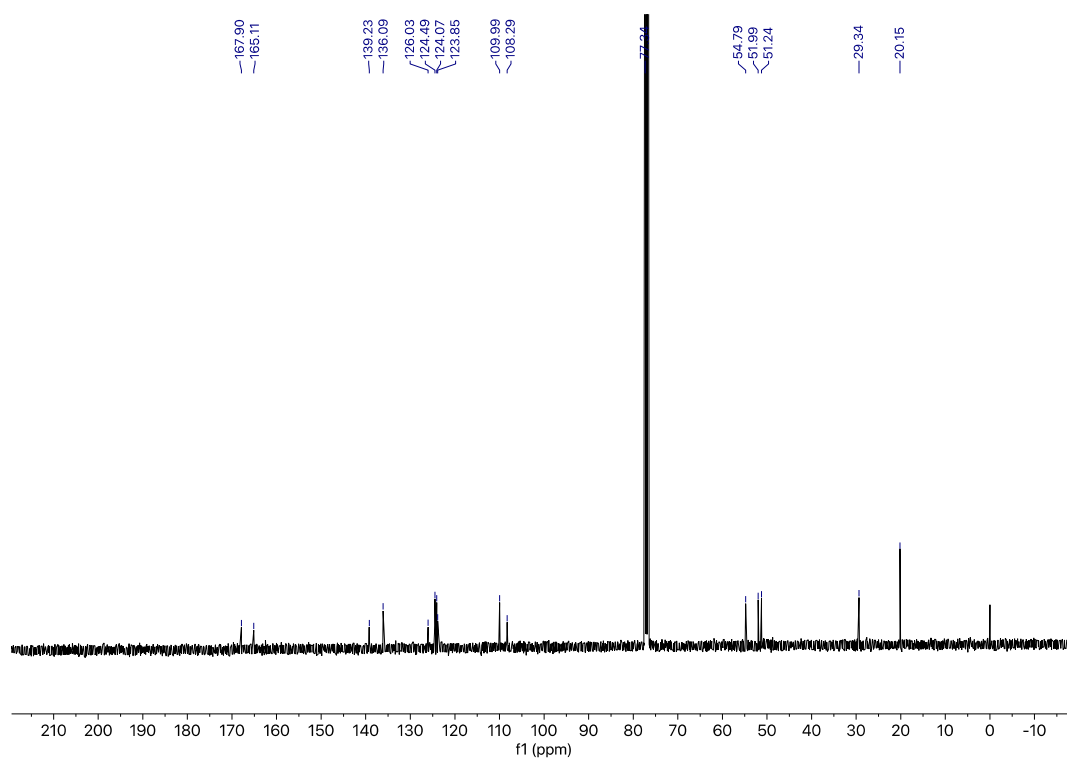

$^1\text{H}$  NMR for dimethyl 1-allyl-1*H*-indole-3,5-dicarboxylate (**19c**)

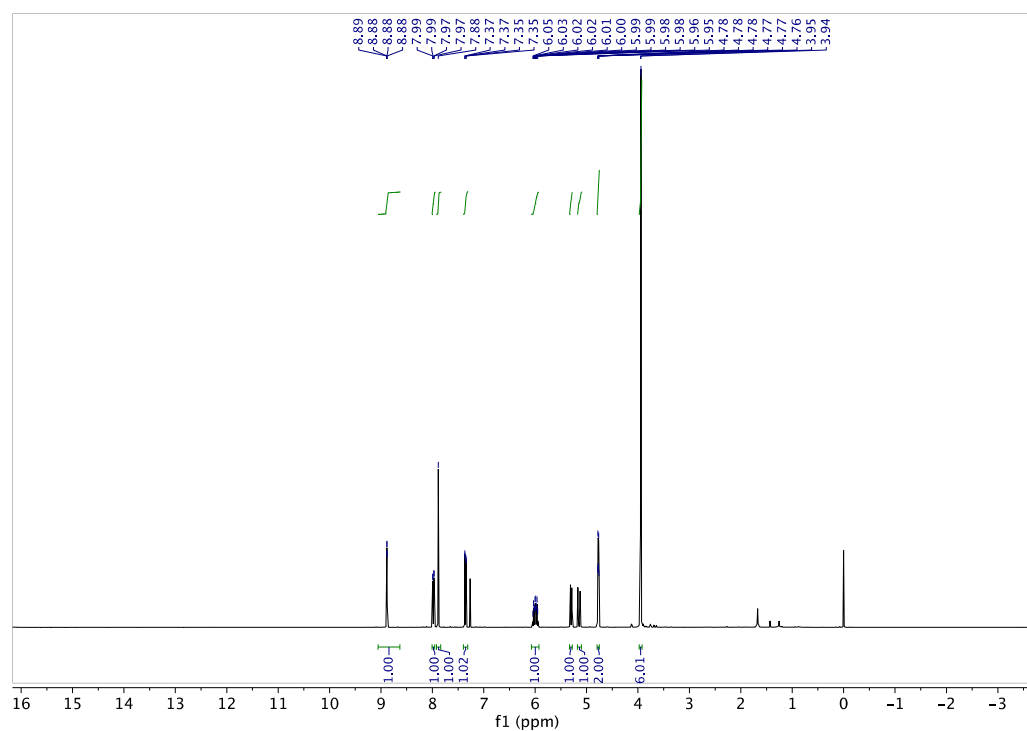

$^{13}\text{C}$  NMR for dimethyl 1-allyl-1*H*-indole-3,5-dicarboxylate (**19c**)

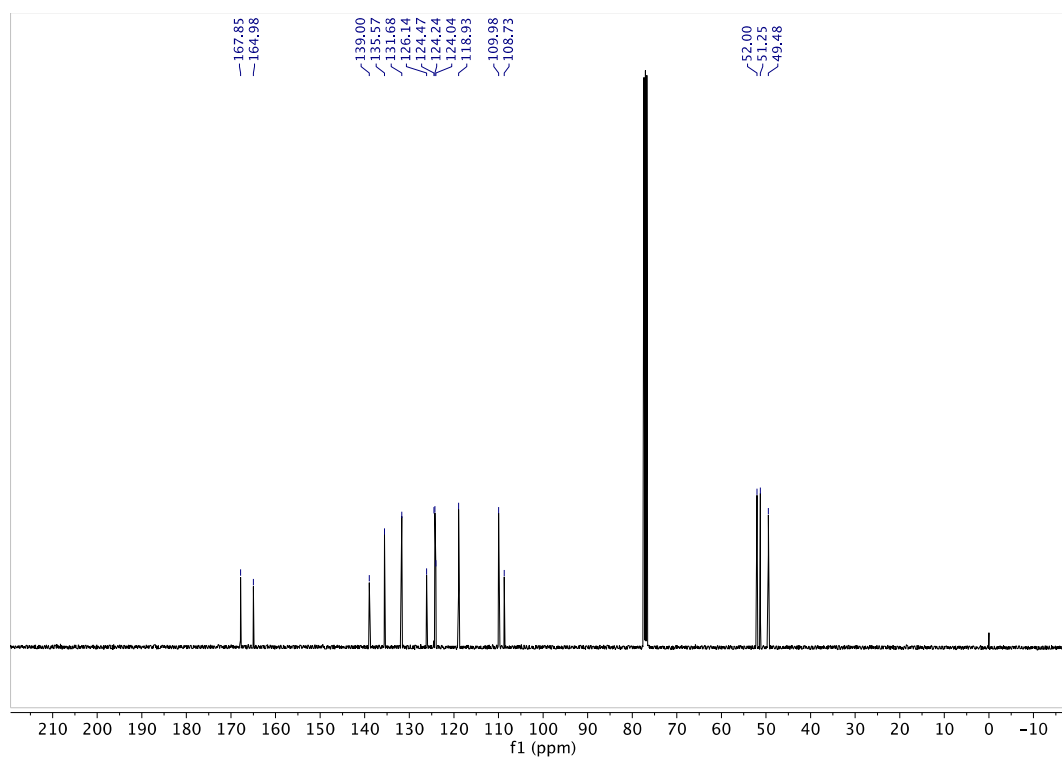

$^1\text{H}$  NMR for dimethyl 1-cyclopropyl-1*H*-indole-3,5-dicarboxylate (**19d**)

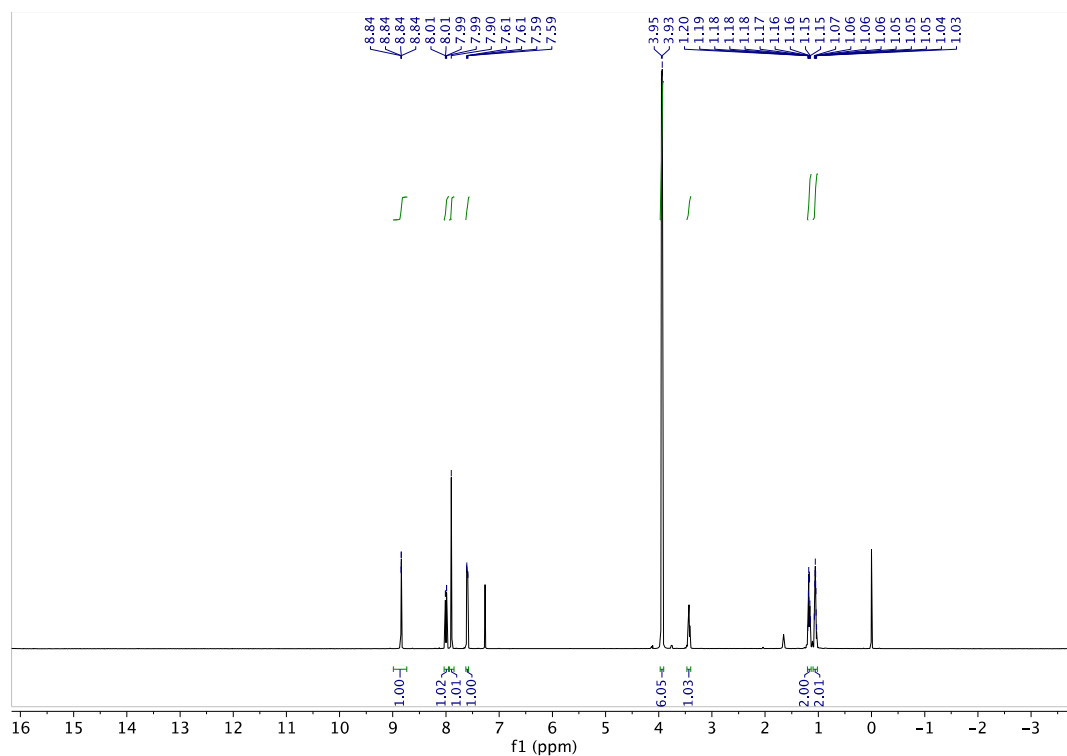

$^{13}\text{C}$  NMR for dimethyl 1-cyclopropyl-1*H*-indole-3,5-dicarboxylate (**19d**)

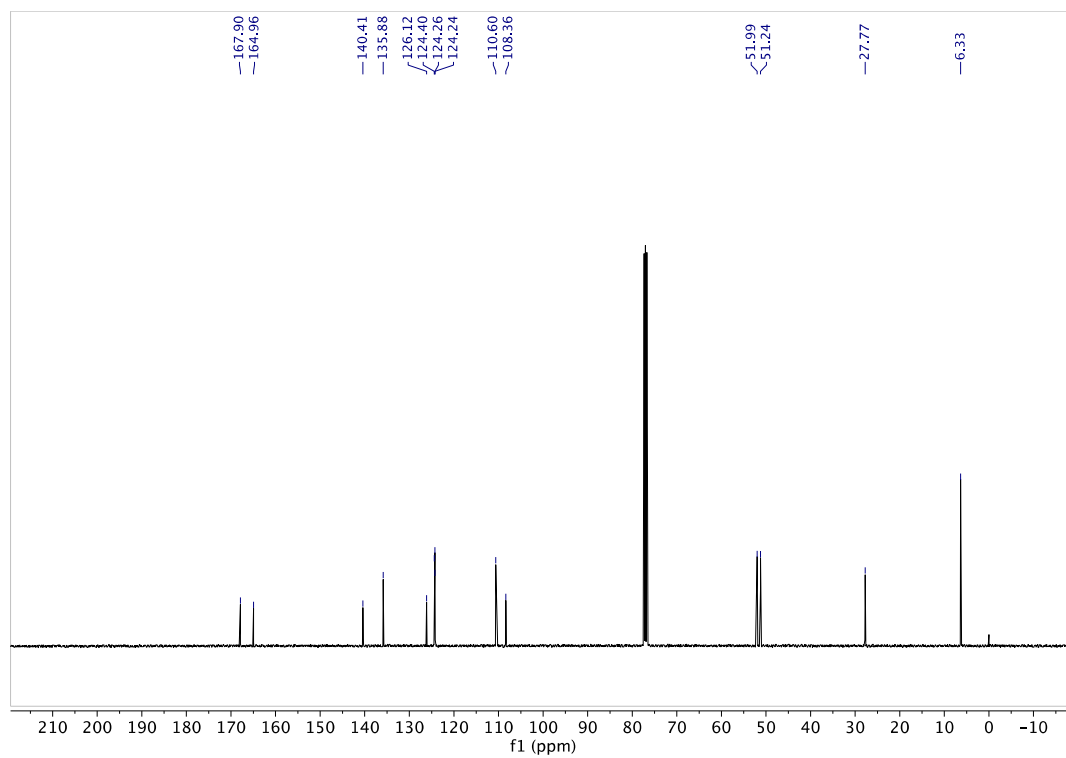

$^1\text{H}$  NMR for dimethyl 1-cyclohexyl-1*H*-indole-3,5-dicarboxylate (**19e**)

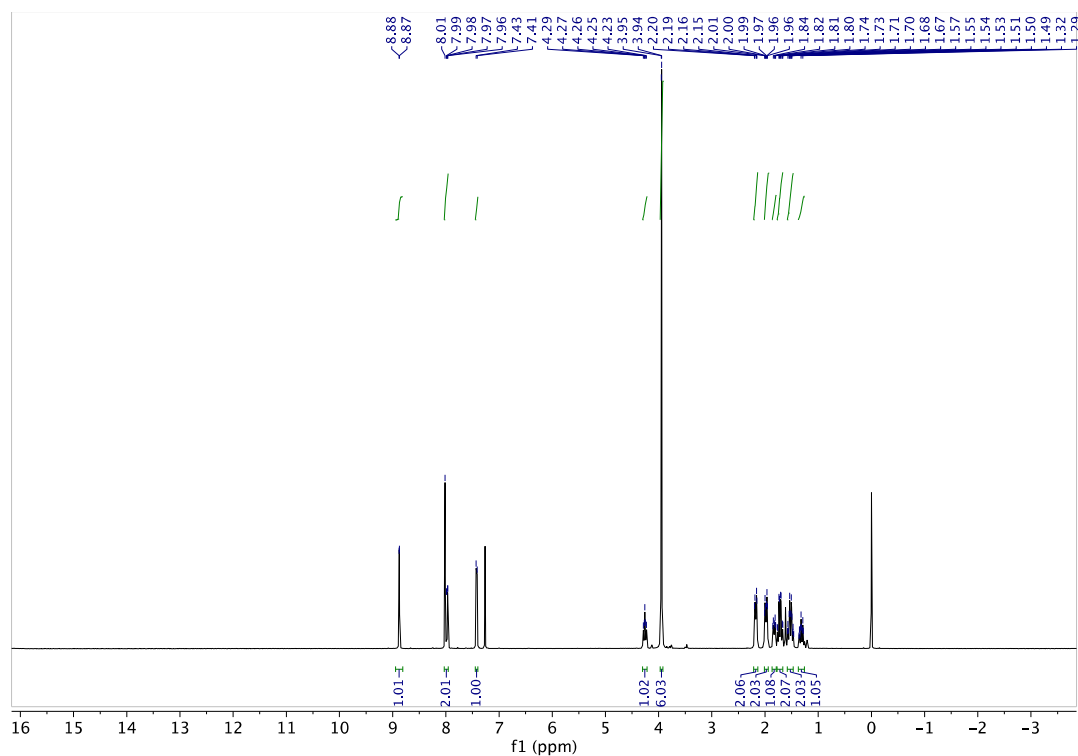

$^{13}\text{C}$  NMR for dimethyl 1-cyclohexyl-1*H*-indole-3,5-dicarboxylate (**19e**)

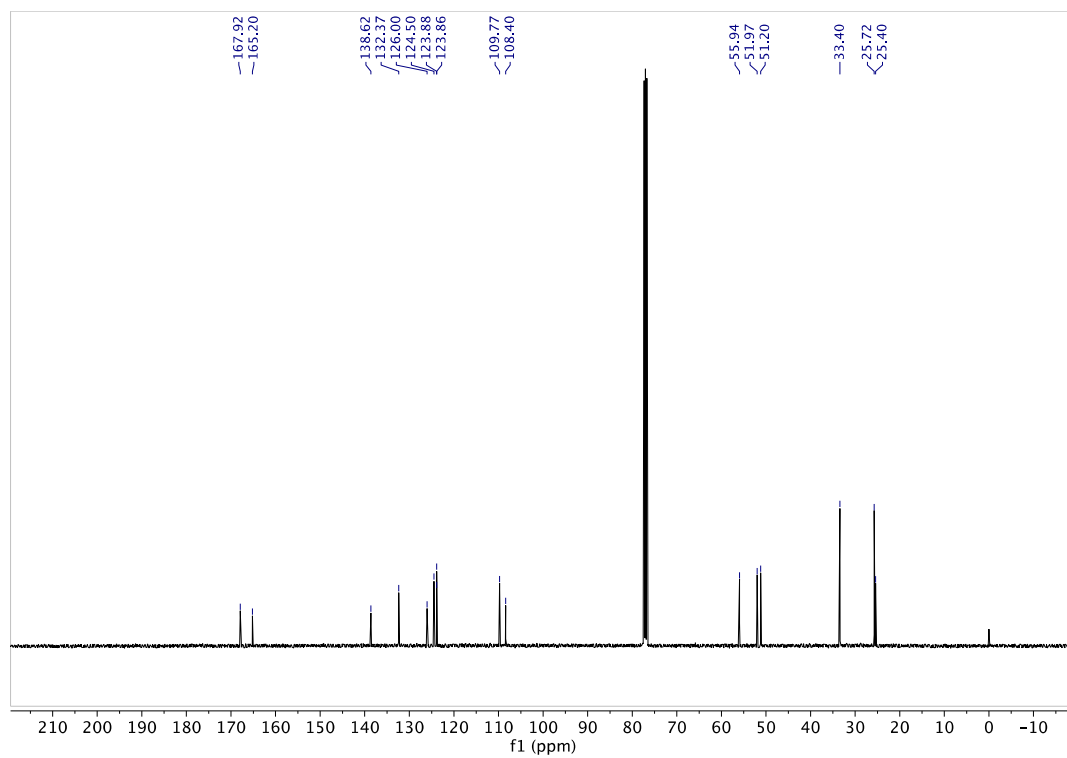

$^1\text{H}$  NMR for dimethyl 1-phenethyl-1*H*-indole-3,5-dicarboxylate (**19g**)

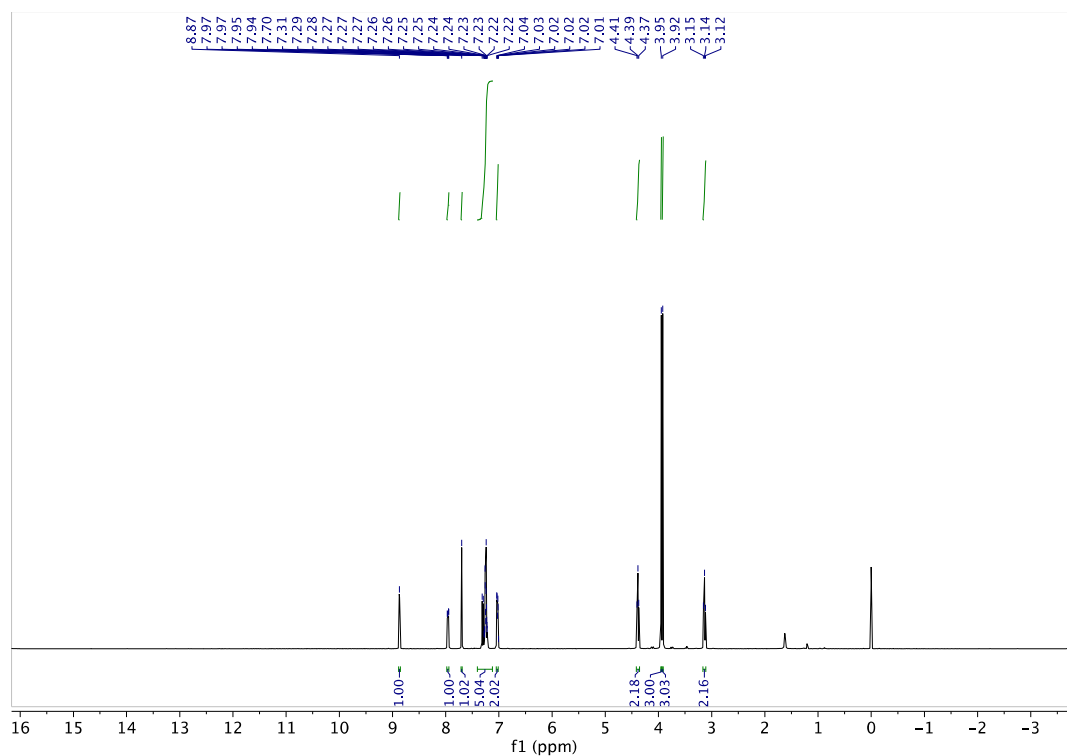

$^{13}\text{C}$  NMR for dimethyl 1-phenethyl-1*H*-indole-3,5-dicarboxylate (**19g**)

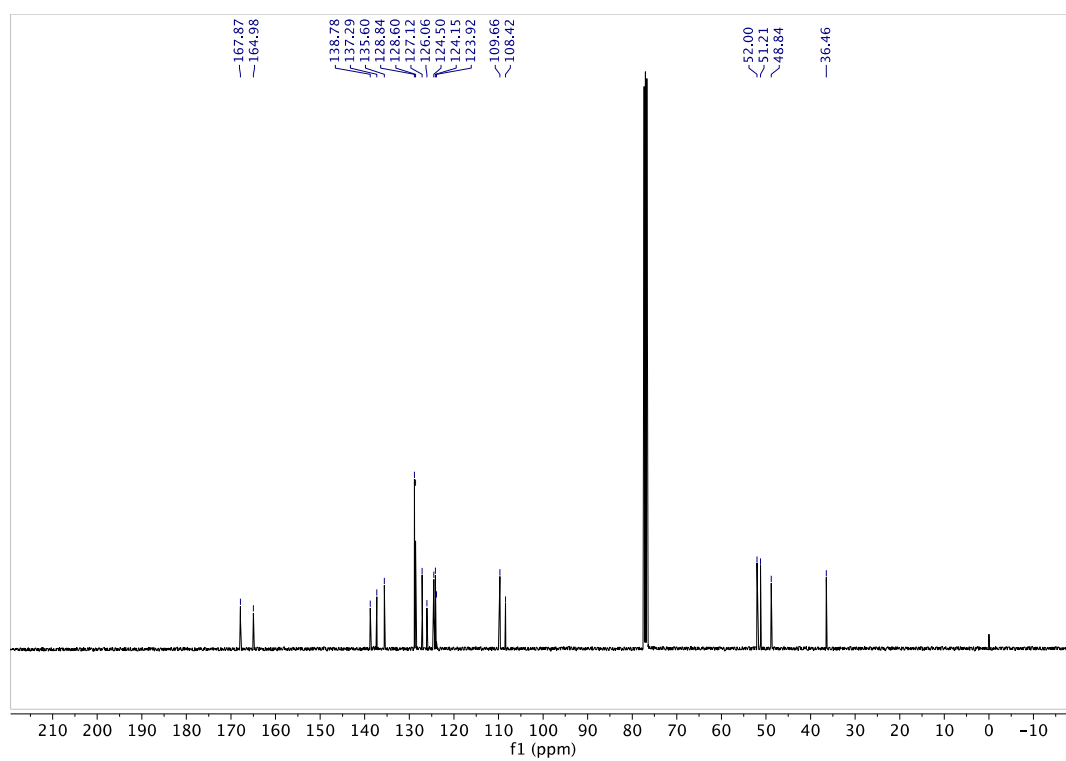

$^1\text{H}$  NMR for dimethyl 1-benzyl-1*H*-indole-3,5-dicarboxylate (**19h**)

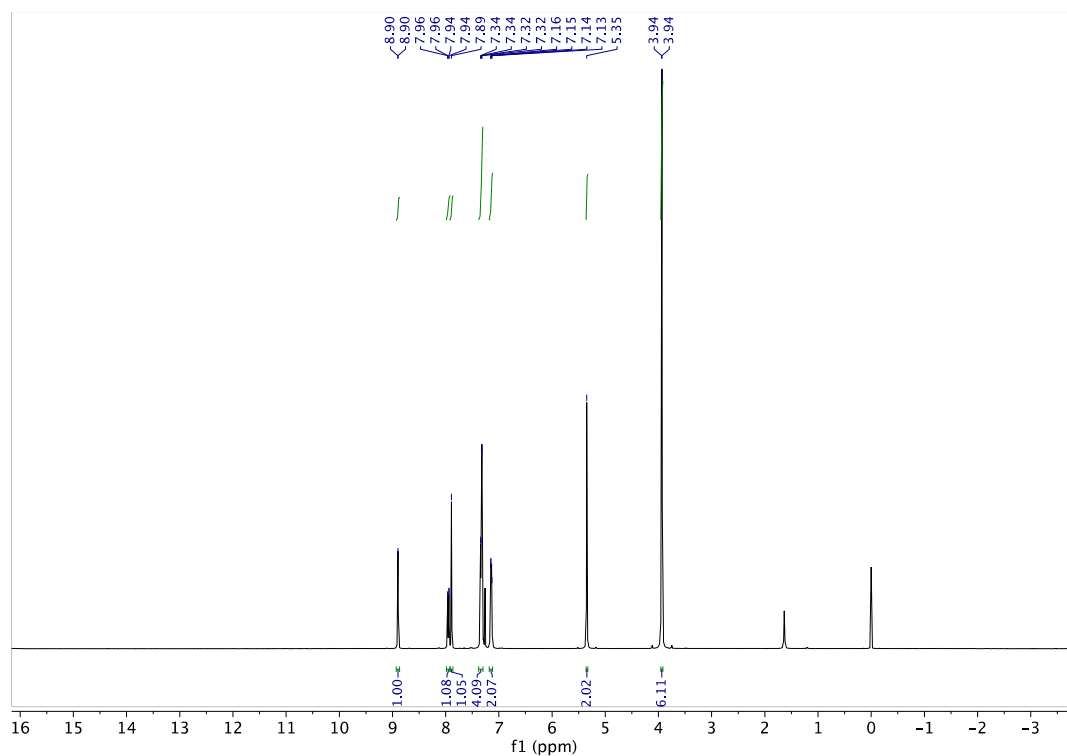

$^{13}\text{C}$  NMR for dimethyl 1-benzyl-1*H*-indole-3,5-dicarboxylate (**19h**)

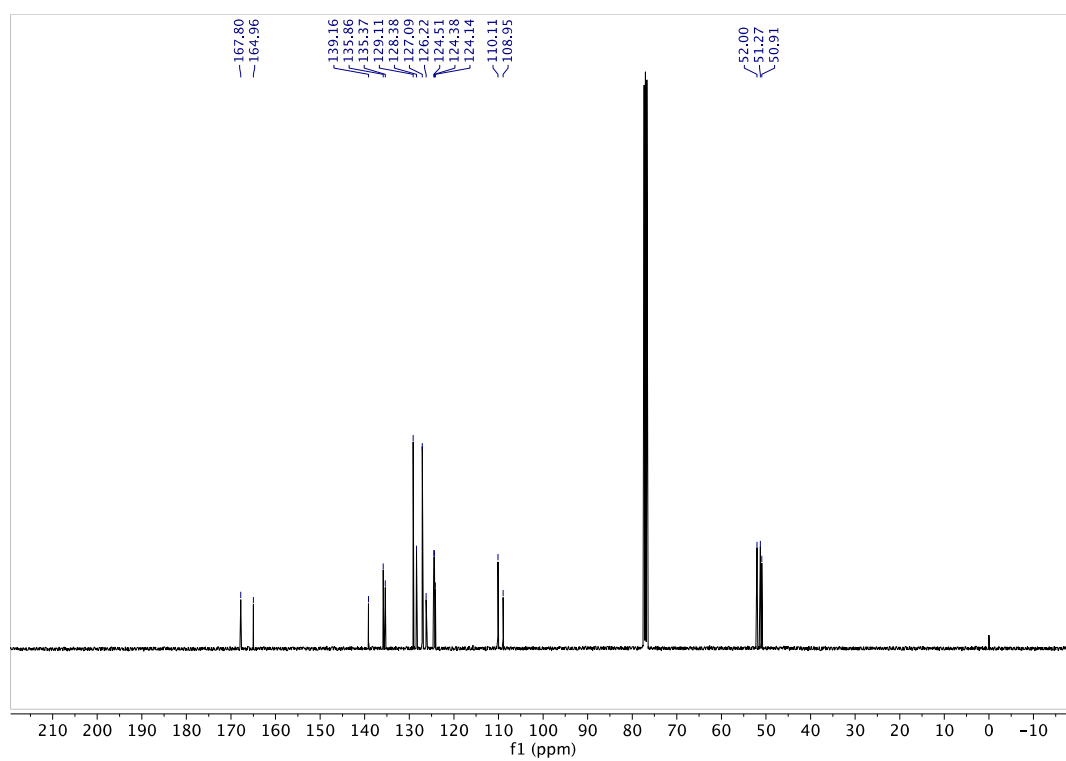

$^1\text{H}$  NMR for dimethyl 1-(4-methylbenzyl)-1*H*-indole-3,5-dicarboxylate (**19i**)

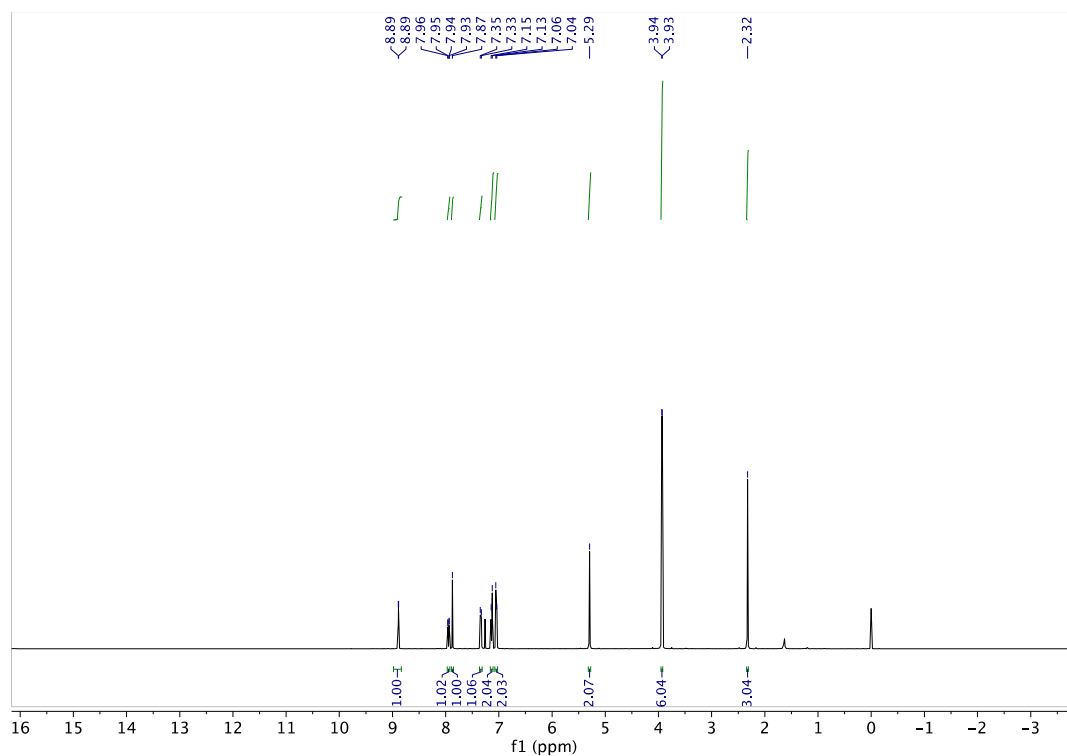



<sup>1</sup>H NMR for dimethyl 1-(3-methoxybenzyl)-1*H*-indole-3,5-dicarboxylate (**19j**)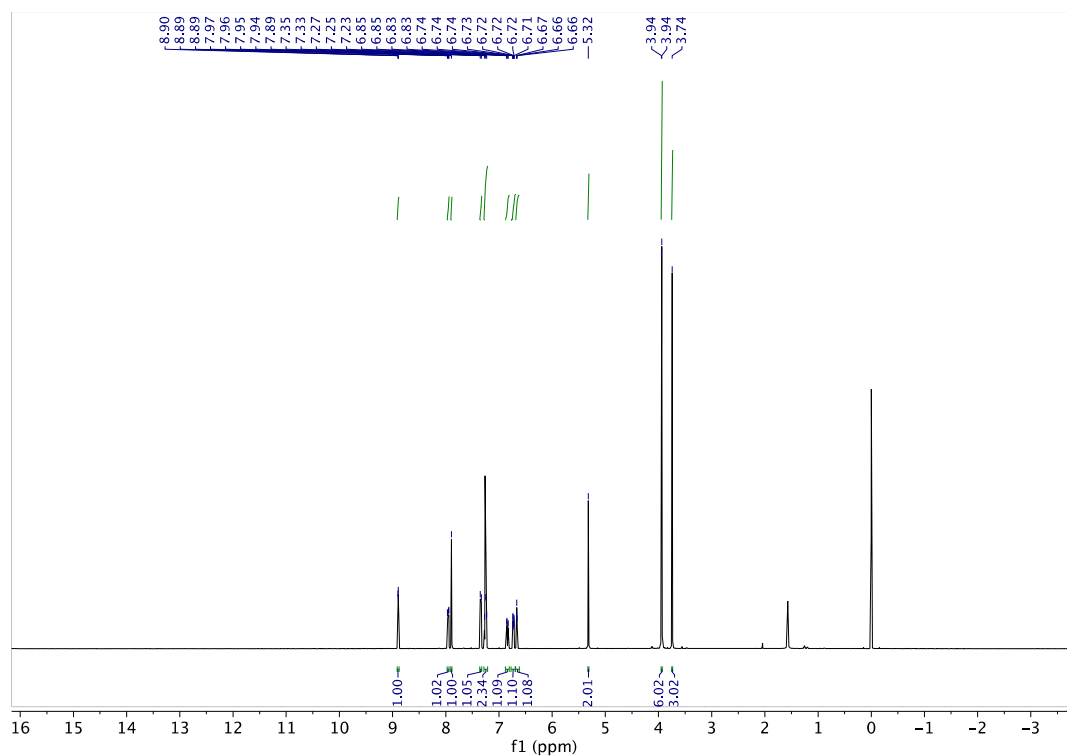<sup>13</sup>C NMR for dimethyl 1-(3-methoxybenzyl)-1*H*-indole-3,5-dicarboxylate (**19j**)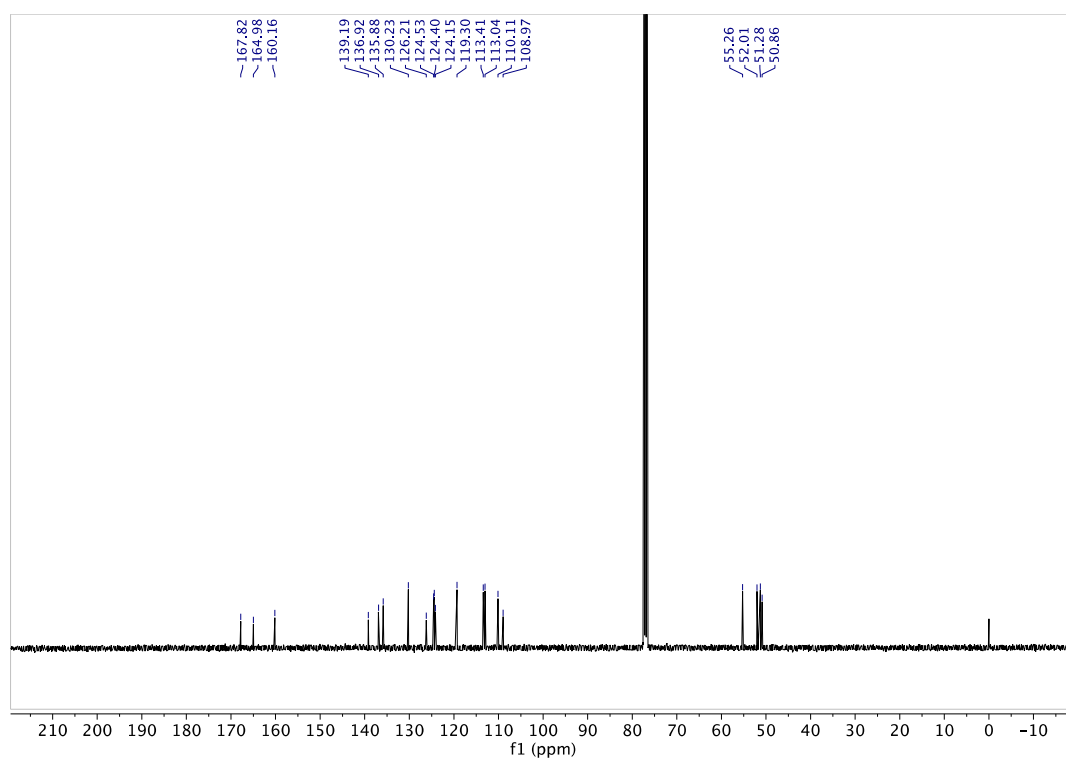

<sup>1</sup>H NMR for dimethyl 1-(4-methoxybenzyl)-1*H*-indole-3,5-dicarboxylate (**19k**)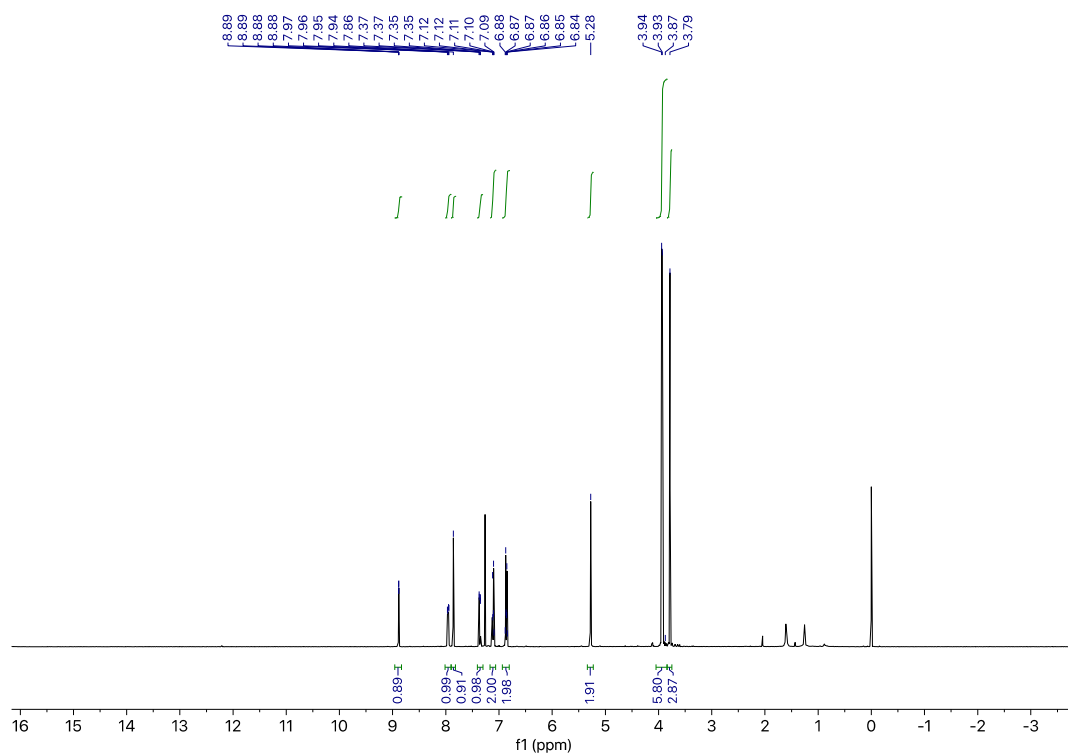<sup>13</sup>C NMR for dimethyl 1-(4-methoxybenzyl)-1*H*-indole-3,5-dicarboxylate (**19k**)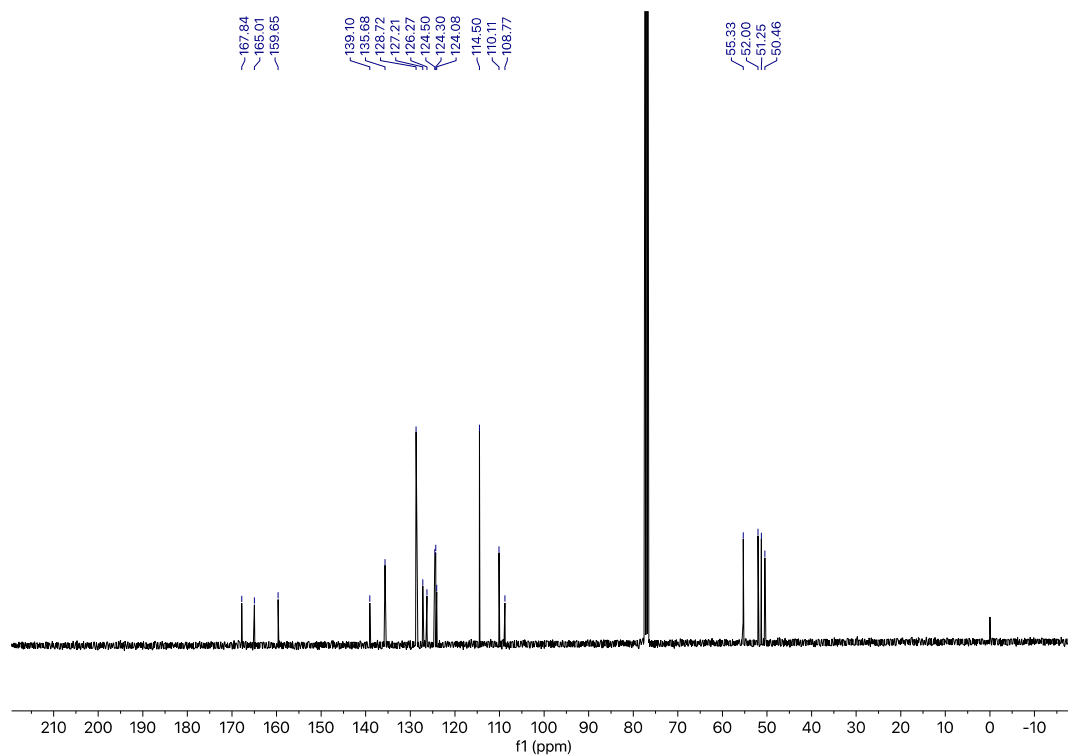

$^1\text{H}$  NMR for dimethyl 1-(4-chlorobenzyl)-1*H*-indole-3,5-dicarboxylate (**19l**)

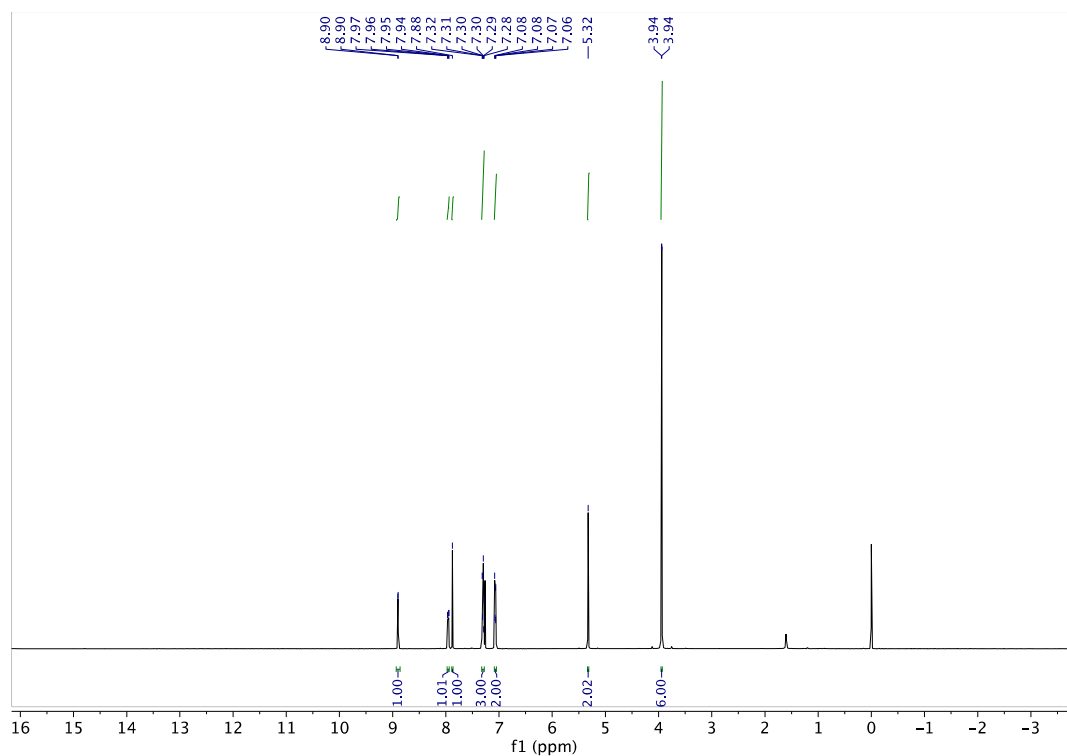

$^{13}\text{C}$  NMR for dimethyl 1-(4-chlorobenzyl)-1*H*-indole-3,5-dicarboxylate (**19l**)

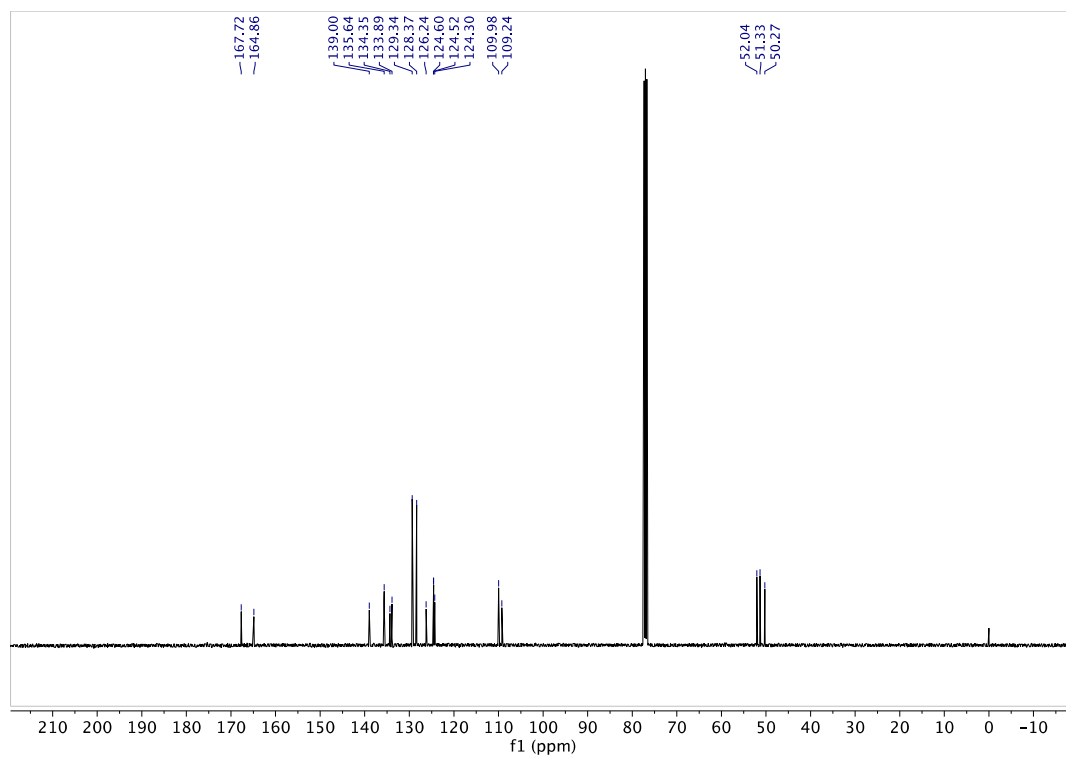

$^1\text{H}$  NMR for dimethyl 1-(3-nitrobenzyl)-1*H*-indole-3,5-dicarboxylate (**19m**)

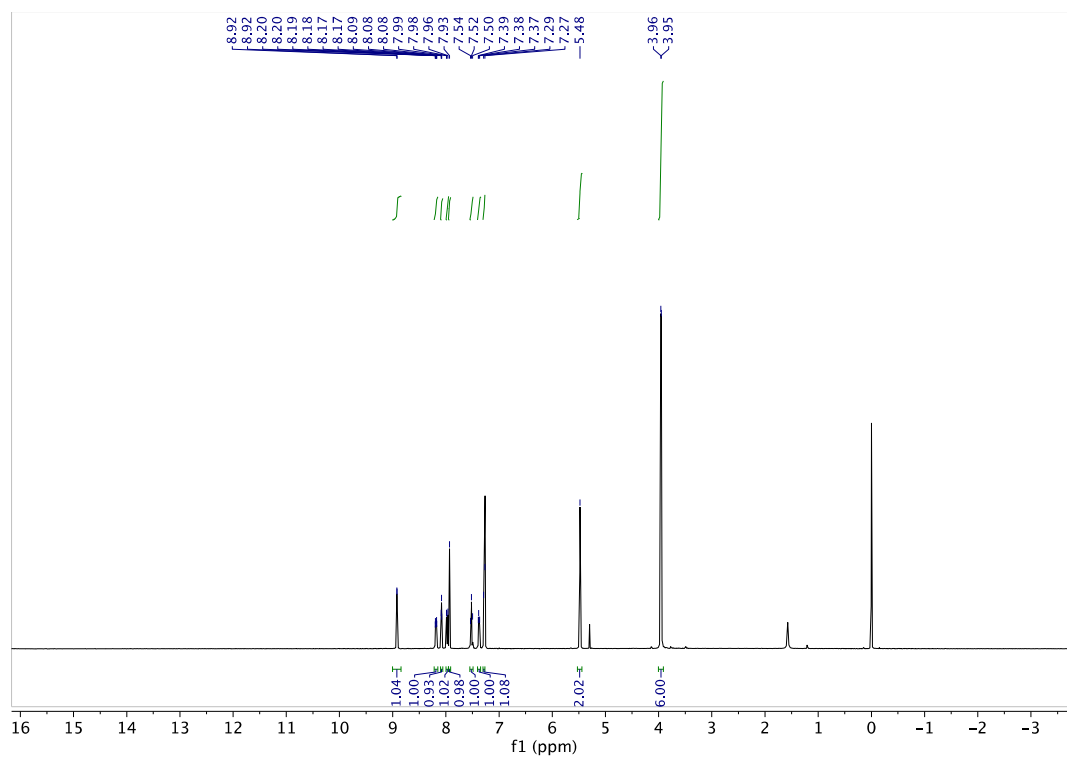

$^{13}\text{C}$  NMR for dimethyl 1-(3-nitrobenzyl)-1*H*-indole-3,5-dicarboxylate (**19m**)

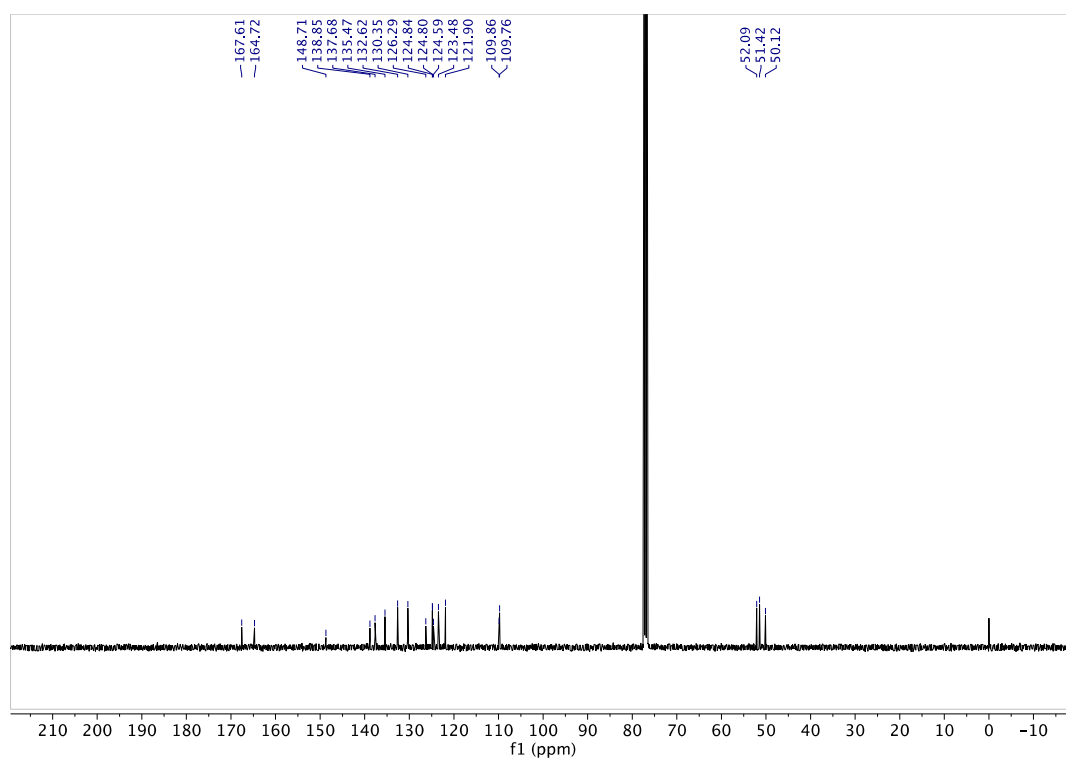

Supplement: s1 [file s1]
